# Supplementary material
Source: ML conference proceedings conference paper supplement (https://openaccess.thecvf.com/content/CVPR2026/html/Cui_Boosting_Document_Parsing_CVPR_2026_paper.html)
Supplement: Supplementary file 1 [file Cui_Boosting_Document_Parsing_CVPR_2026_supplemental.pdf]

# Boosting Document Parsing Efficiency and Performance with Coarse-to-Fine Visual Processing

## Supplementary Material

### I. Training Dataset Details

This two-stage approach offers unique advantages in terms of data collection, as obtaining isolated element images along with their annotations is more feasible than collecting complete document pages containing different elements. In the following sections, we will elaborate on the construction of multimodal model training data for text, tables, formulas, and charts.

#### I.1. Text

We have curated a large-scale dataset comprising 20 Million High-Quality Image-Text Pairs. As shown in Figure S1, the dataset generation follows a rigorous multi-stage pipeline which primarily involves:

1. **Automatic Data Annotation:** We design an automatic annotation pipeline that integrates lightweight document-structure models with large multimodal language models. Specifically, PP-StructureV3 is employed as an expert model to perform layout analysis and text recognition, generating pseudo labels that are converted into prompts for multimodal models such as ERNIE-4.5-VL and Qwen2.5-VL to refine. Finally, the refined labels are aggregated and randomly merged at multiple granularities to produce 20 million high-quality image-text training samples.
2. **High-quality OCR Data Synthesis:** During data distillation, low label quality in challenging scenarios like messy handwriting and dense blurry text was addressed by expanding the dataset through synthetic generation. Utilizing diverse CSS styles, over 200 fonts, and various corpora, we rendered a large amount of images, thereby enhancing the model’s capabilities in these difficult scenarios.

Ultimately, the data is meticulously annotated at three distinct hierarchical levels: text lines, text blocks, and text pages. With extensive language coverage of 109 languages, including major global ones like Chinese, English, French, and Hindi. It includes diverse scenes including Academic Papers, Newspapers, Handwritten texts, Ancient books, Id cards, tickets, seals, etc. Additionally, the dataset addresses compatibility with a variety of writing systems and text styles, covering Printing, Handwriting, Scanned text, Artistic Fonts, etc.

#### I.2. Table

As shown in Figure S2, we constructed a large-scale dataset of over 5 million high-quality image-table pairs. Our

dataset construction employs three key strategies: automatic data annotation, potential annotation mining, and high-quality data synthesis. For coding efficiency, we adopt OTSL [15] as the model’s target format instead of conventional HTML. The main dataset construction process is as follows:

1. **Automatic Data Annotation:** To enhance the performance of PaddleOCR-VL in table recognition, we built a large-scale, diverse dataset covering various languages, border styles, and table types. Tables are first located using PP-StructureV3 [6]. For unlabeled images, we employed a multi-stage annotation pipeline: ERNIE-4.5-VL [3] first generates pseudo-labels, which are then validated by a ERNIE-4.5-VL-28B-A3B [3] as discriminative model. Rejected annotations are refined using DianJin-OCR-R1 [5] (for tools, we use ERNIE-4.5-VL and PP-StructureV3 [6]). Finally, all annotations undergo rigorous rule-based verification, including n-gram analysis and HTML validation, to ensure only high-quality samples are used for training.
2. **Potential Annotation Mining:** For public data with potential annotations (e.g., from arXiv), we extract tables and their corresponding official-supported HTML source code. We then employ a mechanism combining regular expression matching with contextual and sequential alignment to construct accurate table-HTML pairs. The extracted HTML subsequently undergoes rule-based filtering, yielding high-quality data samples ready for model training.
3. **High-quality Table Synthesis:** To overcome data imbalance and high annotation costs, we introduce an innovative high-quality table synthesis tool which constitutes the cornerstone of our table data collection pipeline. This tool enables both randomized synthesis for comprehensive data supplement and targeted synthesis to enhance recognition of specific table categories. Specifically, we first leverage LLMs to gather a diverse and extensive corpus. Then, our tool generates table training pairs through randomized configurations of structures, fonts, CSS styles, and textual content, while also supporting customized synthesis by specifying particular parameters to accurately simulate specialized table types. With a synthesis speed of 10,000 samples per hour, our tool has produced over 5,500,000 training instances, substantially enhancing our model’s generalization capability and comprehensive performance in table recognition.

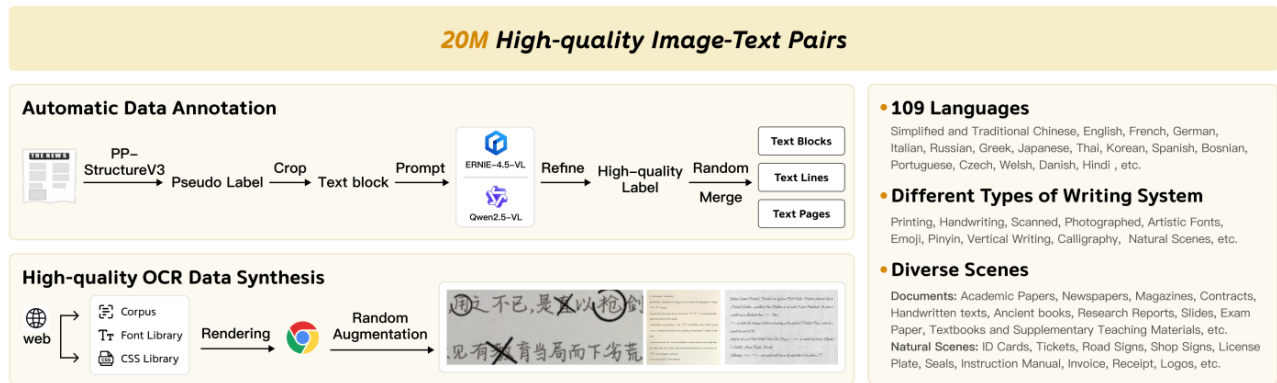

Figure S1. The construction method and characteristics of the text training data for PaddleOCR-VL-0.9B.

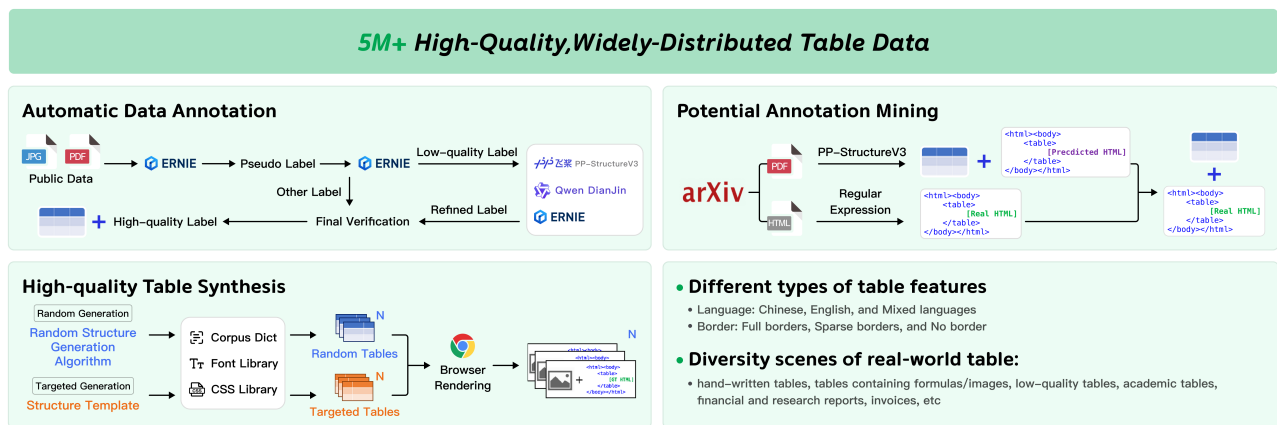

Figure S2. The construction method and characteristics of the table training data for PaddleOCR-VL-0.9B.

Through the aforementioned data construction strategies, we build a comprehensive table dataset encompassing diverse table categories and recognition scenarios, thereby providing robust support for training our model in the table recognition task.

### I.3. Formula

As shown in Figure S3, this dataset was developed using a range of strategies, including source code rendering, automatic data annotation, targeted synthesis of long-tail data, and public data collection. It encompasses a variety of formula scenarios, such as educational supplementary materials, test papers for primary and secondary schools, mathematical papers, PowerPoint courseware, university theses, financial research reports, and handwritten mathematical notes. The dataset features four types of formulas: Simple Printed Expressions, Complex Printed Expressions, Screen-Captured Expressions, and Handwritten Expressions, available in both Chinese and English. The main process for

constructing the dataset is as follows:

1. **Source Code Rendering:** To enhance the model's adaptability to a wide variety of unusual formula structures, a large amount of paper source code was scraped from arXiv, and LaTeX code for the formulas was extracted using regular expressions. Then, MinHash was used to remove duplicate and highly similar formula source codes, and KaTeX was employed to normalize the formula source codes, thereby reducing their ambiguity. Finally, the formulas were re-rendered into images using a formula rendering engine.
2. **Automatic Data Annotation:** For real-world formula data from exam papers, educational materials, and handwritten notes, the process begins with the use of the layout analysis method PP-StructureV3 [6] to identify the bounding boxes for formulas. Based on these bounding boxes, formula regions are cropped from the images. Subsequently, large multimodal language models, such as ERNie-4.5-VL-28B-A3B [3], are employed

## 4 Types Chinese and English , 7 M High-Quality Image-Formula Pairs

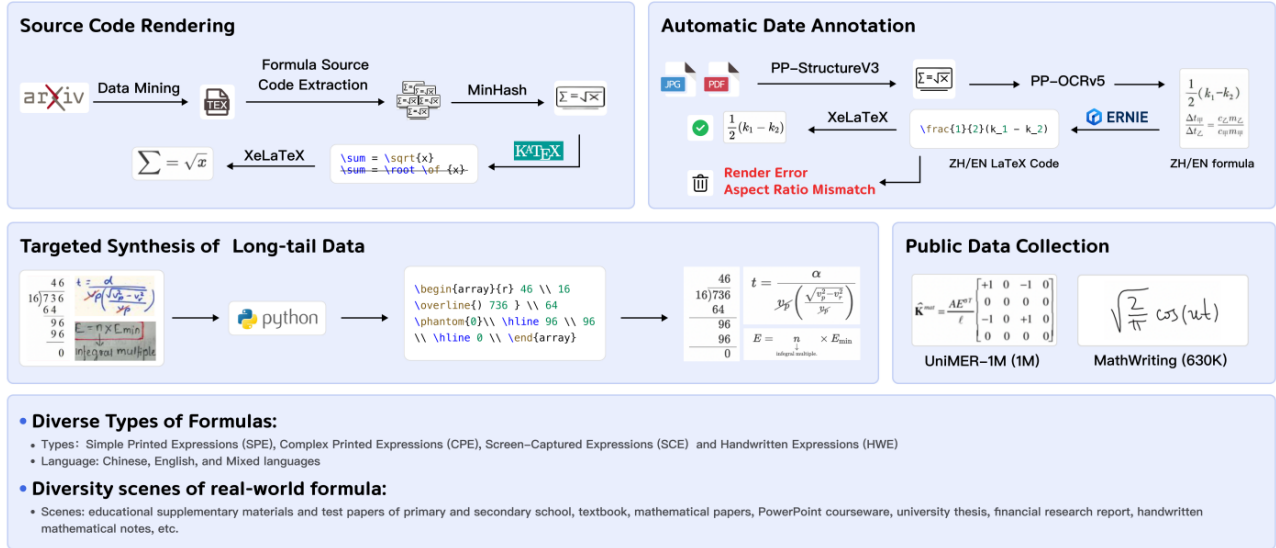

Figure S3. The construction method and characteristics of the formula training data for PaddleOCR-VL-0.9B.

to generate the LaTeX source code for these formulas. Given the rarity of Chinese formulas in real-world scenarios—where approximately 1 out of 100 formulas contains Chinese characters—PP-OCRv5 [6] is utilized to recognize characters within the cropped regions, enabling targeted optimization when Chinese characters are detected. Due to the complex and diverse nature of real-world formulas, recognition errors may occur with existing large models. To address this, a LaTeX rendering engine is used to filter the formulas generated by these models. Specifically, image-formula pairs that cannot be successfully rendered by xelatex are discarded. For those that render successfully, a more in-depth screening is conducted by comparing metrics such as the aspect ratio between the recognized image and the rendered image.

- 3. Targeted Synthesis of Long-tail Data:** For certain long-tail formula structures, such as elementary school vertical calculations, formulas with strikethroughs, and handwritten formulas with explanatory arrows, existing multimodal large models struggle to accurately recognize them due to data distribution issues. To address this, LaTeX code is synthetically generated based on rules and inverse rendering is performed using a LaTeX rendering engine, thereby constructing image-formula matching pairs for these long-tail scenarios.
- 4. Public Data Collection:** In order to enable the model to learn high-quality formula representations, a substantial amount of data has been collected from existing pub-

lic datasets, including UniMER-1M [26] and MathWriting [9]. Specifically, UniMER-1M is oriented towards real document scenarios and has gathered 1 million formula data from arXiv, Pix2tex [13], CROHME [16, 20, 21], and HME100K [27]. On the other hand, MathWriting is currently the largest handwritten mathematical formula dataset, comprising 230,000 real handwritten formula samples and 400,000 synthetic handwritten formula samples.

### I.4. Chart

We constructed a large-scale, bilingual (Chinese and English) dataset of over 0.8 million high-quality image-chart pairs. Our dataset construction employs four key strategies: public data collection and cleaning, automatic data annotation, data synthesis, and targeted long-tail data augmentation. The dataset covers a wide array of chart types from diverse sources, including academic papers, financial reports, and web pages. The main dataset construction process is as follows:

- 1. Public Data Collection and Cleaning:** We collected a large number of samples from public datasets, including ChartQA [17], PlotQA [19], Chart2Text [11], DVQA [10], Unichart [18], Beagle [4], ChartINFO [7], visText [25], and ExcelChart [14]. However, the raw datasets suffered from poor annotation quality and extremely imbalanced data distributions. Thus, a meticulous data cleaning and filtering pipeline was implemented to remove noisy samples and ensure balanced

clustering, resulting in a high-quality dataset of 220k samples.

2. **Automatic Data Annotation:** To annotate our large collection of unlabeled public and in-house data, we developed a two-stage annotation pipeline based on the Vision Large Language Model ERNIE-4.5-VL [3]. In the first stage, the model extracts tick labels from the x- and y-axes; in the second, random permutations of these labels are used to query corresponding data points, framing annotation as a data retrieval task. A final consistency check ensures that only verified annotations are included in the training set, guaranteeing high reliability.
3. **Data Synthesis:** To capture diverse visual styles and enhance model generalization, we designed a three-stage data synthesis pipeline. It begins with a large collection of base data tables, followed by an LLM Persona [8] strategy using ERNIE-X1 [3], which diversifies table content and generates persona-specific rendering code. This enables control over chart aesthetics such as color, font, and layout. Leveraging a billion distinct personas, the pipeline produces highly varied data structures and visual styles, substantially improving PaddleOCR-VL’s generalization across real-world charts. For rendering, we employ matplotlib and seaborn.
4. **Targeted Long-tail Data Augmentation:** To improve generalization on real-world long-tail samples, we designed a data augmentation pipeline based on seed charts. It first selects long-tail samples by their distinctive visual features, then uses ERNIE-4.5-VL [3] to replicate their rendering code. ERNIE-X1 [3], guided by a specific persona [8], further diversifies the code by altering data tables and visual styles. Executing the modified code produces new augmented charts with corresponding data tables.

Through the four data construction strategies mentioned above, the final chart dataset covers a wide range of application scenarios and a rich variety of chart styles, providing strong support for the training of chart models.

## II. Supported Languages

PaddleOCR-VL supports a total of 109 languages. Table S1 lists the correspondence between each language category and the specific supported languages.

## III. Additional Experiments

### III.1. Ablation Study on VRFM

To further analyze the architectural design of VRFM, we conduct controlled comparisons with several representative baselines, including an end-to-end vision–language model (Qwen3-VL-8B), a token-reduction approach based on region cropping (DocKylin [28] + Qwen3-VL-8B), and a

| Language Category | Specific Languages                                                                                                                                                                                                                                                                                                                                                                                                                                        |
|-------------------|-----------------------------------------------------------------------------------------------------------------------------------------------------------------------------------------------------------------------------------------------------------------------------------------------------------------------------------------------------------------------------------------------------------------------------------------------------------|
| Chinese           | Chinese                                                                                                                                                                                                                                                                                                                                                                                                                                                   |
| English           | English                                                                                                                                                                                                                                                                                                                                                                                                                                                   |
| Korean            | Korean                                                                                                                                                                                                                                                                                                                                                                                                                                                    |
| Japanese          | Japanese                                                                                                                                                                                                                                                                                                                                                                                                                                                  |
| Thai              | Thai                                                                                                                                                                                                                                                                                                                                                                                                                                                      |
| Greek             | Greek                                                                                                                                                                                                                                                                                                                                                                                                                                                     |
| Tamil             | Tamil                                                                                                                                                                                                                                                                                                                                                                                                                                                     |
| Telugu            | Telugu                                                                                                                                                                                                                                                                                                                                                                                                                                                    |
| Arabic            | Arabic, Persian, Uyghur, Urdu, Pashto, Kurdish, Sindhi, Balochi                                                                                                                                                                                                                                                                                                                                                                                           |
| Latin             | French, German, Afrikaans, Italian, Spanish, Bosnian, Portuguese, Czech, Welsh, Danish, Estonian, Irish, Croatian, Uzbek, Hungarian, Serbian (Latin), Indonesian, Occitan, Icelandic, Lithuanian, Maori, Malay, Dutch, Norwegian, Polish, Slovak, Slovenian, Albanian, Swedish, Swahili, Tagalog, Turkish, Latin, Azerbaijani, Kurdish, Latvian, Maltese, Pali, Romanian, Vietnamese, Finnish, Basque, Galician, Luxembourgish, Romansh, Catalan, Quechua |
| Cyrillic          | Russian, Belarusian, Ukrainian, Serbian (Cyrillic), Bulgarian, Mongolian, Abkhazian, Adyghe, Kabardian, Avar, Dargin, Ingush, Chechen, Lak, Lezgin, Tabasaran, Kazakh, Kyrgyz, Tajik, Macedonian, Tatar, Chuvash, Bashkir, Malian, Moldovan, Udmurt, Komi, Ossetian, Buryat, Kalmyk, Tuvan, Sakha, Karakalpak                                                                                                                                             |
| Devanagari        | Hindi, Marathi, Nepali, Bihari, Maithili, Angika, Bhojpuri, Magahi, Santali, Newari, Konkani, Sanskrit, Haryanvi                                                                                                                                                                                                                                                                                                                                          |

Table S1. Supported Languages

detection-based pipeline with heuristic reading-order rules (PP-DocLayout).

As shown in Table S2, DocKylin reduces the number of visual tokens (5818  $\rightarrow$  4316) but leads to a noticeable performance drop ( $-1.85\%$ ), indicating that token reduction without explicit structural modeling may discard important layout information. PP-DocLayout achieves competitive token efficiency; however, its reliance on hand-crafted reading-order rules limits its generalization ability.

In contrast, VRFM jointly models region detection and reading order within a unified framework and explicitly preserves spatial relationships. As a result, it achieves both lower token consumption and higher accuracy. These results suggest that the performance gains stem from explicit document structure modeling rather than naive token pruning.

| Method                           | Visual Tokens | Acc.(%)      |
|----------------------------------|---------------|--------------|
| Qwen3-VL-8B [1]                  | 5818          | 89.60        |
| DocKylin [28] + Qwen3-VL-8B [1]  | 4316          | 87.75        |
| PP-DocLayout [24] + Qwen3-VL-8B  | 3876          | 89.30        |
| PP-DocLayout + PaddleOCR-VL-0.9B | 2347          | 89.96        |
| VRFM + Qwen3-VL-8B               | 4262          | 90.37        |
| <b>VRFM + PaddleOCR-VL-0.9B</b>  | 2561          | <b>92.62</b> |

Table S2. Comparison of VRFM with representative baselines in terms of token efficiency and accuracy.

### III.2. Multilingual Performance

To evaluate the generalization ability of our method, we further conduct experiments on multilingual document parsing across diverse scripts. The evaluation covers a wide range of languages, including Arabic, Korean, Tamil, Greek, Thai, Telugu, Devanagari, Cyrillic, Latin, and Japanese.

As shown in Table S3, our method consistently achieves superior performance across all evaluated languages, demonstrating strong robustness to diverse linguistic and script variations. In particular, it significantly outperforms existing methods on low-resource and structurally complex scripts such as Telugu and Tamil.

These results validate that PaddleOCR-VL-0.9B effectively captures language-agnostic structural representations, enabling robust performance across multilingual scenarios.

| Language   | Qwen2.5-VL-72B | Dolphin | MinerU2.5 | Ours  |
|------------|----------------|---------|-----------|-------|
| Arabic     | 0.405          | 0.682   | 0.978     | 0.122 |
| Korean     | 0.056          | 0.699   | 0.917     | 0.052 |
| Tamil      | 0.389          | 0.912   | 0.957     | 0.043 |
| Greek      | 0.165          | 0.691   | 0.661     | 0.135 |
| Thai       | 0.194          | 0.709   | 0.880     | 0.081 |
| Telugu     | 0.758          | 0.832   | 0.937     | 0.011 |
| Devanagari | 0.164          | 0.818   | 0.915     | 0.097 |
| Cyrillic   | 0.220          | 0.549   | 0.832     | 0.109 |
| Latin      | 0.021          | 0.037   | 0.063     | 0.013 |
| Japanese   | 0.181          | 0.309   | 0.588     | 0.086 |

Table S3. Multilingual OCR performance comparison (Edit Distance ↓).

### IV. Inference Performance on Different Hardware Configurations

We measured the inference performance of PaddleOCR-VL on different hardware configurations, as summarized in Table S4. As observed, PaddleOCR-VL demonstrates stable and efficient inference performance across a wide range of hardware and backend configurations, showing that the system can flexibly adapt to diverse computing environments. Moreover, we are currently integrating the FastDeploy backend, which is expected to further enhance inference efficiency in future releases.

### V. More Visualization Results

#### V.1. Real-world Samples

This appendix showcases the parsing and recognition capabilities of our proposed algorithm across a variety of challenging scenarios.

Section V.3 demonstrates the overall document parsing capability of PaddleOCR-VL. Figures S5-S8 are examples of parsing different types of documents in Markdown format.

Figures S9-S11 in section V.4 illustrate the superior ability of PaddleOCR-VL to process pages featuring intricate

| Hardware  | Backend | Total Time (s)↓ | Pages/s↑ | Tokens/s↑ | Avg. VRAM Usage (GB)↓ |
|-----------|---------|-----------------|----------|-----------|-----------------------|
| A100      | vLLM    | 800.9           | 1.2241   | 1881.2    | 43.7                  |
|           | SGLang  | 917.6           | 1.0684   | 1641.5    | 49.8                  |
| A10       | vLLM    | 1238.0          | 0.7921   | 1217.2    | 14.1                  |
|           | SGLang  | 1429.9          | 0.6858   | 1055.8    | 20.0                  |
| RTX 3060  | vLLM    | 2749.1          | 0.3568   | 548.2     | 11.9                  |
|           | SGLang  | 2792.4          | 0.3513   | 540.8     | 11.8                  |
| RTX 5070  | vLLM    | 1292.9          | 0.7584   | 1165.5    | 8.9                   |
| RTX 4090D | vLLM    | 845.3           | 1.1597   | 1781.8    | 16.7                  |
|           | SGLang  | 951.8           | 1.0303   | 1586.1    | 21.8                  |

Table S4. End-to-End Inference Performance

or challenging layouts.

Figures S12 and S13 in section V.5 demonstrate that PaddleOCR-VL maintains excellent reading order when faced with complex layouts, such as those found in various reports, textbooks, newspapers, magazines, and even vertical documents.

Section V.6 highlights the robust text recognition performance of PaddleOCR-VL in challenging cases, including multilingual text, handwriting text, and vertical text, which are presented in Figures S14-S22.

The model’s table recognition abilities are demonstrated in section V.7. Figures S23 and S24 showcase its robust handling of a wide array of table formats, including tables from academic papers, tables from financial reports, tables with watermark, tables with image, tables with formulas and photograph of tables.

Figures in section V.8 detail the formula recognition performance. Figure S25 demonstrates the ability to handle various types of english formulas including complex printed expressions, handwritten expressions screen-captured expressions and vertical formula, while Figure S26 focuses on the ability to handle formulas that contain Chinese characters.

In section V.9, PaddleOCR-VL demonstrates impressive chart recognition capabilities, a feature currently lacking in many expert OCR VLMs like MinerU2.5 [22], dots.ocr [23] or MonkeyOCR [12]. Figures S27-S29 showcase our ability to parse various chart types, including pie charts, bar charts, line charts, bar-line hybrid charts and heatmap.

#### V.2. Compare with Others

PaddleOCR-VL showcases superior performance in scenarios involving PDF pages with complex layout, consistently outperforming existing state-of-the-art (SOTA) models. This is evident from Figures S30 and S31, which highlight its exceptional capability in handling pages with intricate layouts and unique elements, surpassing other solutions.

Moreover, the model demonstrates exceptionally high recognition accuracy in several domains, including Multi-

lingual Text Recognition, Handwriting Text Recognition, and Vertical Text Recognition. Figures S32- S37 illustrate how PaddleOCR-VL outperforms competitors such as MinerU2.5 [22] and MonkeyOCR [12], which tend to misidentify languages like Russian and Hindi as English, overlook some handwritten characters, and struggle with vertical text recognition.

In dealing with complex tables, PaddleOCR-VL's parsing accuracy stands out, as evidenced by Figures S38 and S39. This is a domain where other models frequently encounter difficulties.

Additionally, Figure S40 demonstrates PaddleOCR-VL's proficiency in accurately parsing complex formulas. In contrast, other SOTA models often produce incorrect or flawed outputs when faced with challenging mathematical notations.

Finally, as depicted in Figures S41 and S42, PaddleOCR-VL also excels in Chart Recognition. It outperforms multi-modal large language models like Qwen2.5VL-72B [2] and GPT-4o by accurately reconstructing the structure and content of charts.

# V.3. Comprehensive Document Parsing

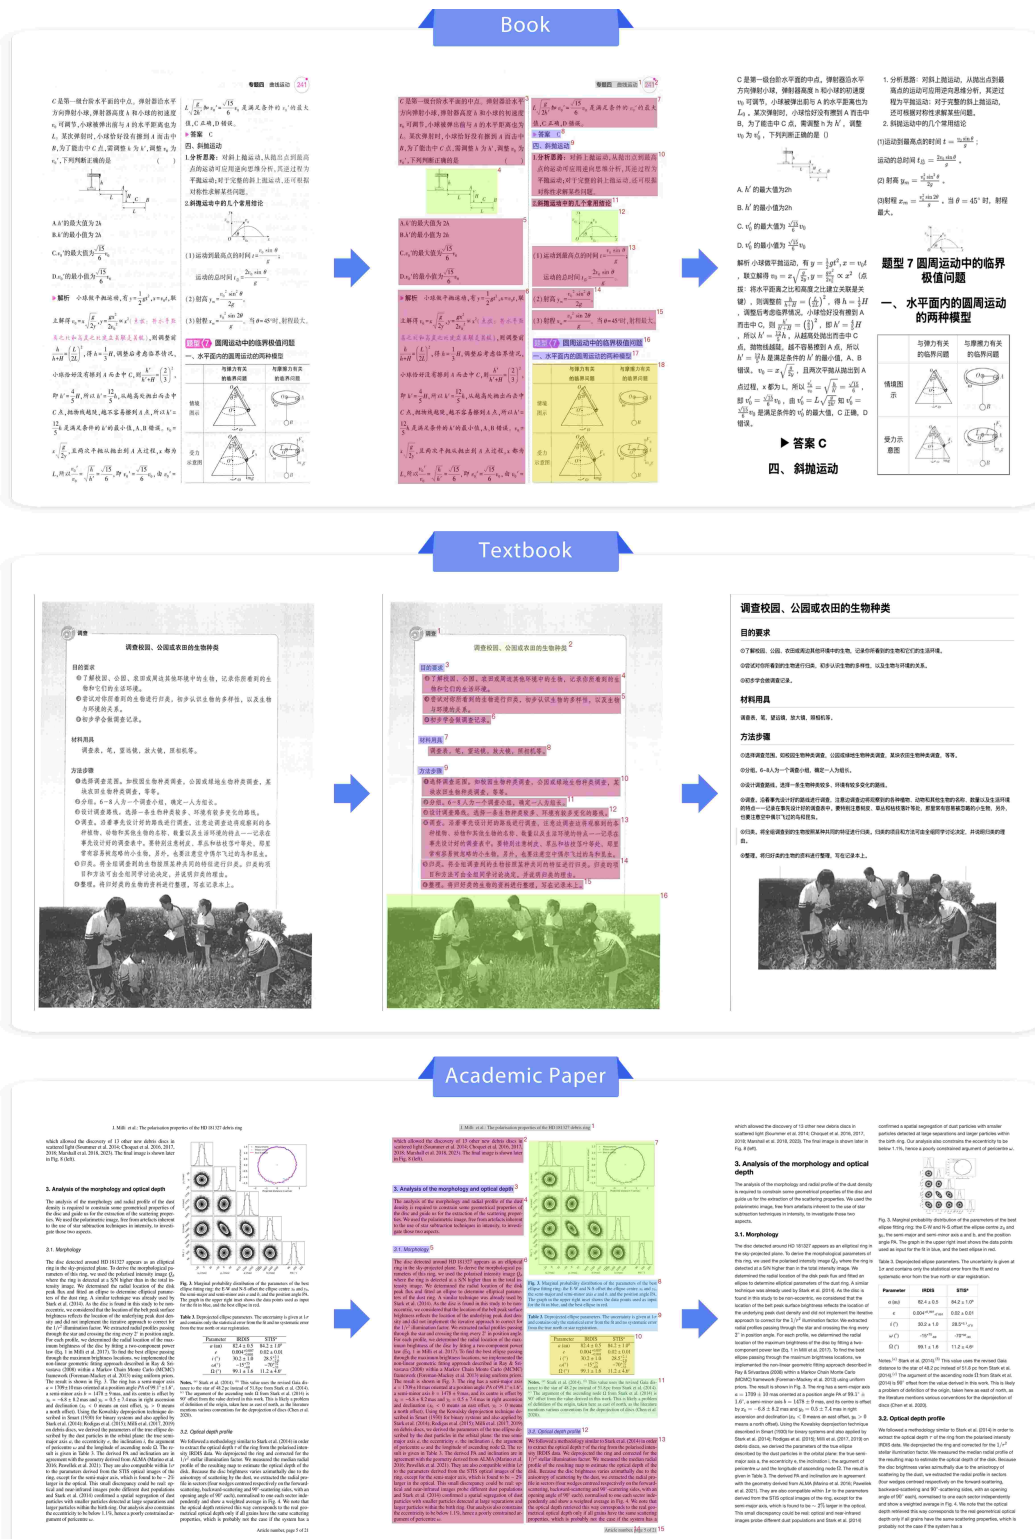

Figure S5. The Layout and Markdown Output for Book, Textbook and Academic Paper.

### Research Report

2024年7月，公司启动鄂州地区Kumba铁矿项目一期建设，启动了投资额约1.5亿元的一体化项目，采用先进设计产能提升为300万吨/年，由原设计产能提升为300万吨/年。截至7月，Kumba铁矿项目一期建设已启动，项目一期建设已启动，项目一期建设已启动。

2024年8月，公司启动鄂州地区Thoum项目一期建设，启动了投资额约2.0亿元的一体化项目，采用先进设计产能提升为300万吨/年，由原设计产能提升为300万吨/年。截至8月，Thoum项目一期建设已启动，项目一期建设已启动，项目一期建设已启动。

| 年份   | 自有矿产实物量(吨) | 外采矿产实物量(吨) | 代加工矿产实物量(吨) |
|------|------------|------------|-------------|
| 2019 | 0          | 2906       | 0           |
| 2020 | 0          | 2421       | 0           |
| 2021 | 0          | 5501       | 0           |
| 2022 | 4703       | 8175       | 1329        |
| 2023 | 14967      | 0          | 2441        |
| 2024 | 39477      | 0          | 3172        |

(三) 地勘优势助力矿权开发，多金属布局取得新进展

### Financial Report

4. 营业收入构成分析

| 项目   | 本期金额             | 上期金额             | 变动比例   |
|------|------------------|------------------|--------|
| 营业收入 | 1,124,327,451.41 | 1,124,327,451.41 | 0.00%  |
| 营业成本 | 4,953,492,128.27 | 5,114,115,118.27 | -2.36% |
| 毛利   | 6,876,965,249.86 | 6,189,242,332.14 | 11.11% |

4. 营业收入构成分析

| 项目   | 本期金额             | 上期金额             | 变动比例   |
|------|------------------|------------------|--------|
| 营业收入 | 1,124,327,451.41 | 1,124,327,451.41 | 0.00%  |
| 营业成本 | 4,953,492,128.27 | 5,114,115,118.27 | -2.36% |
| 毛利   | 6,876,965,249.86 | 6,189,242,332.14 | 11.11% |

4. 营业收入构成分析

| 项目   | 本期金额             | 上期金额             | 变动比例   |
|------|------------------|------------------|--------|
| 营业收入 | 1,124,327,451.41 | 1,124,327,451.41 | 0.00%  |
| 营业成本 | 4,953,492,128.27 | 5,114,115,118.27 | -2.36% |
| 毛利   | 6,876,965,249.86 | 6,189,242,332.14 | 11.11% |

### Slides&Exam Paper

Computer Organization and Architecture  
Designing for Performance

Chapter 3  
A Top-Level View of Computer Function and Interconnection

Prof. Yi Zou, PhD 助理  
School of Integrated Circuits  
Email: zouyi@tsinghua.edu.cn  
Office: B16-504  
Tsinghua University  
Class Room: F36-211  
Lab Room: B16-201

Computer Organization and Architecture  
Designing for Performance

Chapter 3  
A Top-Level View of Computer Function and Interconnection

Prof. Yi Zou, PhD 助理  
School of Integrated Circuits  
Email: zouyi@tsinghua.edu.cn  
Office: B16-504  
Tsinghua University  
Class Room: F36-211  
Lab Room: B16-201

Computer Organization and Architecture  
Designing for Performance

Chapter 3  
A Top-Level View of Computer Function and Interconnection

Prof. Yi Zou, PhD 助理  
School of Integrated Circuits  
Email: zouyi@tsinghua.edu.cn  
Office: B16-504  
Tsinghua University  
Class Room: F36-211  
Lab Room: B16-201

Figure S6. The Layout and Markdown Output for Research Report(with chart recognition enabled), Financial Report, Slides and Exam Paper.

Notes

加知系统化 作图系统化 基础规范化 配置合理化

将线圈内电路等效为一个电阻R

等效电阻  $R = \frac{U_1}{I_1} = \frac{U_2}{I_2} = \frac{U_2}{\frac{U_1}{k}} = k^2 R_2$  等效电阻

大结论: 等效电阻与匝数成正比, 等效电阻与匝数平方成正比

例题: 2016国16  
S断开时电流为1  
S闭合时电流为4

设匝数比为K, S断开时,  $R' = k^2 \cdot (R_2 + R_3)$ ,  $U = I(R_1 + R')$   
S闭合时,  $R' = K^2 R_2$ ,  $U = 4I(R_1 + K^2 R_2)$   
即:  $I(R_1 + K^2(R_2 + R_3)) = 4I(R_1 + K^2 R_2) \Rightarrow k = 3$

加知系统化 作图系统化 基础规范化 配置合理化

将线圈内电路等效为一个电阻R

等效电阻  $R = \frac{U_1}{I_1} = \frac{U_2}{I_2} = \frac{U_2}{\frac{U_1}{k}} = k^2 R_2$  等效电阻

大结论: 等效电阻与匝数成正比, 等效电阻与匝数平方成正比

例题: 2016国16  
S断开时电流为1  
S闭合时电流为4

设匝数比为K, S断开时,  $R' = k^2 \cdot (R_2 + R_3)$ ,  $U = I(R_1 + R')$   
S闭合时,  $R' = K^2 R_2$ ,  $U = 4I(R_1 + K^2 R_2)$   
即:  $I(R_1 + K^2(R_2 + R_3)) = 4I(R_1 + K^2 R_2) \Rightarrow k = 3$

②等效电阻:

将虚线圈内电路等效为一个电阻R'

欧姆定律:  $R' = \frac{U_1}{I_1} = \frac{U_2}{I_2} = \frac{U_2}{\frac{U_1}{k}} = k^2 R_2$  等效电阻

大结论: 等效电阻与匝数成正比, 等效电阻与匝数平方成正比

等效电阻在等效边匝数在分子上

例题: 2016国16  
S断开时电流为1  
S闭合时电流为4

设匝数比为K, S断开时,  $R' = k^2 \cdot (R_2 + R_3)$ ,  $U = I(R_1 + R')$   
S闭合时,  $R' = K^2 R_2$ ,  $U = 4I(R_1 + K^2 R_2)$   
即:  $I(R_1 + K^2(R_2 + R_3)) = 4I(R_1 + K^2 R_2) \Rightarrow k = 3$

思考与补充:

Vertical Book

刊月安案

殘酷的記錄

兩次歐戰較量談

先

出處: 莊

刊月安案

殘酷的記錄

兩次歐戰較量談

先

出處: 莊

殘酷的記錄

兩次歐戰較量談

先

出處: 莊

Ancient Book

余六十年前誦洛神賦惟知嗟豔羨華葉而已  
老矣始悟建安風骨上承屈宋賢在情真韻純  
勸者文采而歸焉文采者端緒積累非一蹴  
可至七步成詩云詎徒恃天資哉必具二百七  
千步之底功在口讀書破萬卷下筆如有神是  
也故善論書法者首當觀此古之書家往  
不待言而寓於言外應有之筆我蔡邕筆論曰  
欲書先散懷抱任情恣性然後書之試觀目  
三思中郎語設若寡韻或失韻先散懷抱則失神  
任情恣性則失形神俱失罔論書法杜少陵云

余六十年前誦洛神賦惟知嗟豔羨華葉而已  
老矣始悟建安風骨上承屈宋賢在情真韻純  
勸者文采而歸焉文采者端緒積累非一蹴  
可至七步成詩云詎徒恃天資哉必具二百七  
千步之底功在口讀書破萬卷下筆如有神是  
也故善論書法者首當觀此古之書家往  
不待言而寓於言外應有之筆我蔡邕筆論曰  
欲書先散懷抱任情恣性然後書之試觀目  
三思中郎語設若寡韻或失韻先散懷抱則失神  
任情恣性則失形神俱失罔論書法杜少陵云

余六十年前誦洛神賦惟知嗟豔羨華葉而已  
老矣始悟建安風骨上承屈宋賢在情真韻純  
勸者文采而歸焉文采者端緒積累非一蹴  
可至七步成詩云詎徒恃天資哉必具二百七  
千步之底功在口讀書破萬卷下筆如有神是  
也故善論書法者首當觀此古之書家往  
不待言而寓於言外應有之筆我蔡邕筆論曰  
欲書先散懷抱任情恣性然後書之試觀目  
三思中郎語設若寡韻或失韻先散懷抱則失神  
任情恣性則失形神俱失罔論書法杜少陵云

Figure S7. The Layout and Markdown Output for Notes, Vertical Book and Ancient Book.

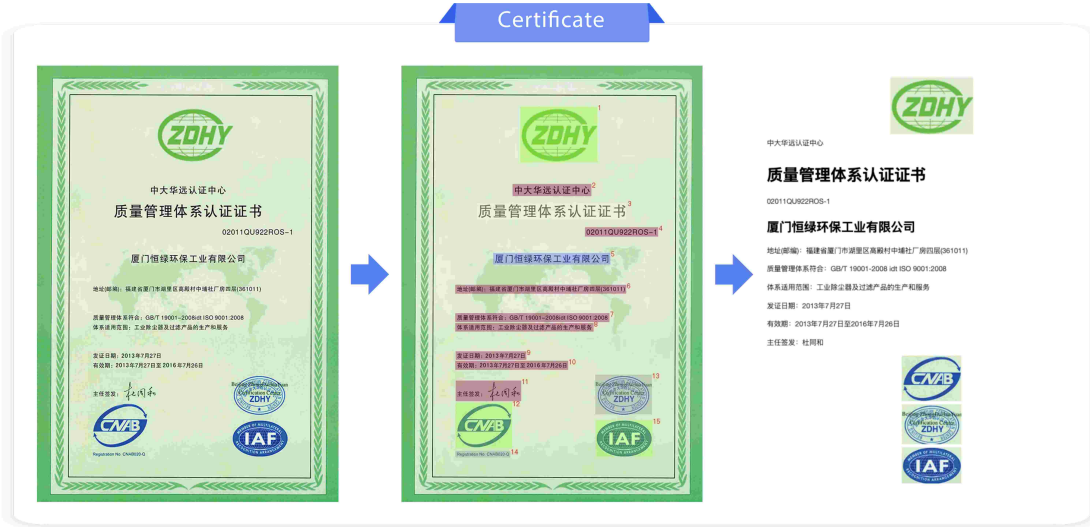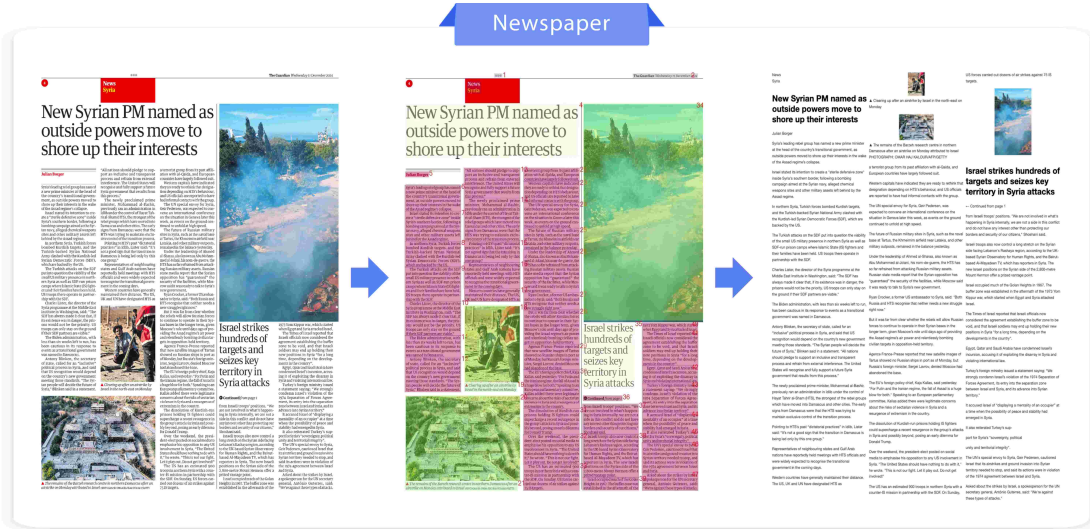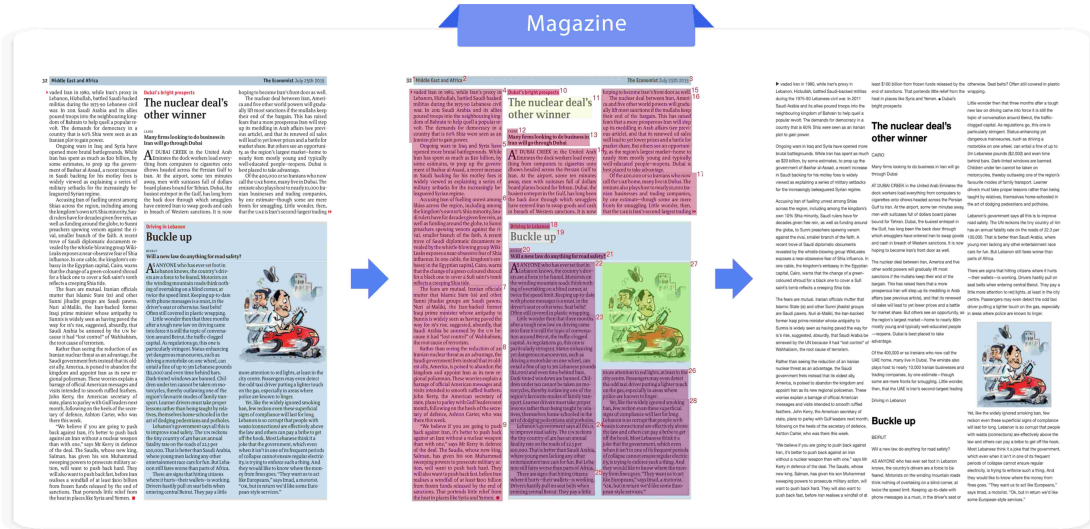

Figure S8. The Layout and Markdown Output for Certificate, Newspaper and Magazine.

## V.4. Layout Detection

### Research Report

**Header 0.93**

**Number 0.92**

**Figure Title 0.95**

**Caption 0.88**

| 年份   | 治疗领域 | 金额 (亿美元) |
|------|------|----------|
| 2016 | 肿瘤   | 120.0    |
| 2017 | 肿瘤   | 130.0    |
| 2018 | 肿瘤   | 140.0    |
| 2019 | 肿瘤   | 150.0    |
| 2020 | 肿瘤   | 160.0    |
| 2021 | 肿瘤   | 170.0    |

**Text 0.91**

**Text 0.92**

**Table 0.97**

| 排名 | 治疗领域 | 金额 (亿美元) |
|----|------|----------|
| 1  | 肿瘤   | 120.0    |
| 2  | 肿瘤   | 130.0    |
| 3  | 肿瘤   | 140.0    |
| 4  | 肿瘤   | 150.0    |
| 5  | 肿瘤   | 160.0    |
| 6  | 肿瘤   | 170.0    |
| 7  | 肿瘤   | 180.0    |
| 8  | 肿瘤   | 190.0    |
| 9  | 肿瘤   | 200.0    |
| 10 | 肿瘤   | 210.0    |

**Table 0.98**

### Book

**Header 0.97**

**Text 0.99**

**Equation-Block 0.96**

$$\frac{(4-1)S^2}{a^2} - \frac{3S^2}{a^2} - x^2(3), \frac{4(\sqrt{x}-1)^2}{a^2} = \frac{4(\sqrt{x}-1)^2}{S^2} \sim F(1,3)$$

**Text 0.94**

**Equation-Block 0.95**

$$f'(x) = \lim_{x \rightarrow 1} \frac{f(x) - f(1)}{x - 1} = 2$$

**Equation-Block 0.93**

$$\int_0^{\pi} f(\sin^2 t + \cos t) dt$$

**Equation-Block 0.92**

$$\lim_{x \rightarrow 0} \frac{f(1+\sin^2 x + \cos x) - f(1)}{3x^2} = \frac{f'(1) \lim_{x \rightarrow 0} (\sin^2 x + \cos x - 1)}{3x^2} = \frac{f'(1) \lim_{x \rightarrow 0} \frac{1}{3} (\frac{\sin^2 x}{x^2} + \frac{\cos x - 1}{x^2})}{3}$$

**Equation-Block 0.91**

$$= 2 \times \frac{1}{3} \times \left[ \frac{1}{3} - \frac{1}{3} \right] = \frac{1}{3}$$

**Equation-Block 0.90**

$$\arccos \frac{x}{2} = \frac{1}{2} \ln(x^2 + y^2) - \frac{1}{2} \ln 2 + \frac{\pi}{4}$$

**Equation-Block 0.89**

$$\frac{1}{1 + \left(\frac{x}{y}\right)^2} = \frac{1}{1 + \frac{x^2}{y^2}} = \frac{y^2}{y^2 + x^2}$$

**Equation-Block 0.88**

$$y' = \frac{-x - y}{x^2 + y^2} = 0 \Rightarrow x = -y$$

**Equation-Block 0.87**

$$(x+y)y' = -x+y$$

**Equation-Block 0.86**

$$(x+y)^2 y' + (x+y) = -x+y$$

### Scan

**Text 0.94**

**Text 0.93**

**Text 0.92**

**Text 0.91**

**Text 0.90**

**Text 0.89**

**Text 0.88**

**Text 0.87**

**Text 0.86**

**Text 0.85**

**Text 0.84**

**Text 0.83**

**Text 0.82**

**Text 0.81**

**Text 0.80**

**Text 0.79**

**Text 0.78**

**Text 0.77**

**Text 0.76**

**Text 0.75**

**Text 0.74**

**Text 0.73**

**Text 0.72**

**Text 0.71**

**Text 0.70**

**Text 0.69**

**Text 0.68**

**Text 0.67**

**Text 0.66**

**Text 0.65**

**Text 0.64**

**Text 0.63**

**Text 0.62**

**Text 0.61**

**Text 0.60**

**Text 0.59**

**Text 0.58**

**Text 0.57**

**Text 0.56**

**Text 0.55**

**Text 0.54**

**Text 0.53**

**Text 0.52**

**Text 0.51**

**Text 0.50**

**Text 0.49**

**Text 0.48**

**Text 0.47**

**Text 0.46**

**Text 0.45**

**Text 0.44**

**Text 0.43**

**Text 0.42**

**Text 0.41**

**Text 0.40**

**Text 0.39**

**Text 0.38**

**Text 0.37**

**Text 0.36**

**Text 0.35**

**Text 0.34**

**Text 0.33**

**Text 0.32**

**Text 0.31**

**Text 0.30**

**Text 0.29**

**Text 0.28**

**Text 0.27**

**Text 0.26**

**Text 0.25**

**Text 0.24**

**Text 0.23**

**Text 0.22**

**Text 0.21**

**Text 0.20**

**Text 0.19**

**Text 0.18**

**Text 0.17**

**Text 0.16**

**Text 0.15**

**Text 0.14**

**Text 0.13**

**Text 0.12**

**Text 0.11**

**Text 0.10**

**Text 0.09**

**Text 0.08**

**Text 0.07**

**Text 0.06**

**Text 0.05**

**Text 0.04**

**Text 0.03**

**Text 0.02**

**Text 0.01**

### Low-quality Scan

**Text 0.97**

**Text 0.96**

**Text 0.95**

**Text 0.94**

**Text 0.93**

**Text 0.92**

**Text 0.91**

**Text 0.90**

**Text 0.89**

**Text 0.88**

**Text 0.87**

**Text 0.86**

**Text 0.85**

**Text 0.84**

**Text 0.83**

**Text 0.82**

**Text 0.81**

**Text 0.80**

**Text 0.79**

**Text 0.78**

**Text 0.77**

**Text 0.76**

**Text 0.75**

**Text 0.74**

**Text 0.73**

**Text 0.72**

**Text 0.71**

**Text 0.70**

**Text 0.69**

**Text 0.68**

**Text 0.67**

**Text 0.66**

**Text 0.65**

**Text 0.64**

**Text 0.63**

**Text 0.62**

**Text 0.61**

**Text 0.60**

**Text 0.59**

**Text 0.58**

**Text 0.57**

**Text 0.56**

**Text 0.55**

**Text 0.54**

**Text 0.53**

**Text 0.52**

**Text 0.51**

**Text 0.50**

**Text 0.49**

**Text 0.48**

**Text 0.47**

**Text 0.46**

**Text 0.45**

**Text 0.44**

**Text 0.43**

**Text 0.42**

**Text 0.41**

**Text 0.40**

**Text 0.39**

**Text 0.38**

**Text 0.37**

**Text 0.36**

**Text 0.35**

**Text 0.34**

**Text 0.33**

**Text 0.32**

**Text 0.31**

**Text 0.30**

**Text 0.29**

**Text 0.28**

**Text 0.27**

**Text 0.26**

**Text 0.25**

**Text 0.24**

**Text 0.23**

**Text 0.22**

**Text 0.21**

**Text 0.20**

**Text 0.19**

**Text 0.18**

**Text 0.17**

**Text 0.16**

**Text 0.15**

**Text 0.14**

**Text 0.13**

**Text 0.12**

**Text 0.11**

**Text 0.10**

**Text 0.09**

**Text 0.08**

**Text 0.07**

**Text 0.06**

**Text 0.05**

**Text 0.04**

**Text 0.03**

**Text 0.02**

**Text 0.01**

Figure S9. The Layout Detection results for various types of documents.

### Electronic Notes

Header\_image 0.97

text 0.95 (3) 若与博学者日参省乎己，则知明乎行无过矣

text 0.95 (4) 君子生非异也，善假于物也

text 0.95 (5) 善学终日而足矣，不如须臾之所受也

text 0.95 (6) 蟹六跪而二螯，非蛇蝎之穴无可寄托者，用心躁也

text 0.95 3.屈原列传 (节选) (司马迁) 过关检测

text 0.95 (1) 在《屈原列传》中，作者司马迁对“离骚”一词作出自己的解释的语句是：\_\_\_\_\_

text 0.95 (2) 在《屈原列传》中，司马迁认为《离骚》的创作背景除了楚怀王听信谗言、不能明辨是非以外，还有“\_\_\_\_\_”，一针见血地指出了当时朝廷小人当道、正直之人遭到排挤的黑暗现实。

text 0.95 (3) 在《屈原列传》中，作者司马迁运用了“\_\_\_\_\_”这两个被动句写出了屈原诚信待人却被猜疑、忠心耿耿却被诽谤的现实，为下文写屈原心生怨气并作《离骚》作铺垫。

text 0.95 (4) 一个人在辛苦劳作到极点的时候，往往会仰天长叹：“天啊！”这种情况在司马迁的《屈原列传》中有形象的描述：\_\_\_\_\_

text 0.95 (5) 在《屈原列传》中，司马迁为了论证“父母，是人类根本”这一观点，举了“\_\_\_\_\_”这一例子进行了论证。

text 0.95 (6) 在《屈原列传》中，司马迁对《诗经》里的《国风》和《小雅》进行评价的语句是：“\_\_\_\_\_”。

### Table with Image

| 类别        | 物品           | 数量 | 价格  | 购入日期  | 备注                |
|-----------|--------------|----|-----|-------|-------------------|
| 衣物<br>12项 | 短袖 优衣库polo   | 1  | 59  | 24-6  | 喜欢，版型质量都好，穿久了后背发灰 |
|           | 短袖 小猫        | 1  | 19  | 25-5  | 物中最满意的，可惜下架了      |
|           | 短袖 粉色        | 1  | 15  | 25-6  | 品时达喜欢，就是颜色尺寸少     |
|           | 短袖 白色        | 1  | 10  | 25-6  | 外贸wei单，可以         |
|           | 无袖 优衣库467047 | 1  | 59  | 24-7  | 很舒服，类似三宅一生        |
|           | 长牛仔裤 优衣库     | 1  | 174 | 24-3  | 有点重，但是很好看         |
|           | 长微喇裤 黑色      | 1  | 30  | 25-3  | 舒适，就是偏短了点         |
|           | 长微喇裤 小绿橘     | 1  | 60  | 25-4  | 很好，裤有夜再入一条        |
|           | 短裤 七号仓库      | 1  | 60  | 24-5  | 很好                |
|           | 内裤 彩田        | 3  | 30  | 25-6  | 广东本土老品牌           |
|           | 内衣 宜倍梦/奶糖派   | 3  | 210 | 24-12 | 很好                |
|           | 袜子 纯棉        | 1  | 5   | 25-1  | 随便买的，想回购也找不到店铺    |

### Medical Test Report

Header: 血液细胞检验报告单

| 检测项目                 | 结果       | 参考范围      | 单位                 | 检测项目               | 结果    | 参考范围        | 单位                  |
|----------------------|----------|-----------|--------------------|--------------------|-------|-------------|---------------------|
| 1 白细胞(WBC)           | 18.98    | 3.90-9.80 | 10 <sup>9</sup> /L | 16 红细胞(ORC)        | 4.92  | 3.80-6.00   | 10 <sup>12</sup> /L |
| 2 中性粒细胞(Neut)        | 76.9     | 40.0-75.0 | %                  | 17 血红蛋白(HGB)       | 144   | 110-170     | g/L                 |
| 3 淋巴细胞(Lym)          | 14.6     | 20.0-40.0 | %                  | 18 红细胞压积(RCT)      | 42.3  | 35.0-50.0   | %                   |
| 4 单核细胞(Mon)          | 4.6      | 3.0-10.0  | %                  | 19 红细胞平均体积(MCV)    | 86.1  | 82.0-100.0  | fL                  |
| 5 嗜酸性粒细胞(Eos)        | 3.5      | 0.4-6.0   | %                  | 20 平均红细胞血红蛋白量(MCH) | 29.3  | 27.0-34.0   | pg                  |
| 6 嗜碱性粒细胞(Bas)        | 0.4      | 0.0-1.0   | %                  | 21 平均血小板体积(MCV)    | 241   | 210-264     | fL                  |
| 7 中性粒细胞绝对值(Num)      | 14.60    | 1.80-8.30 | 10 <sup>9</sup> /L | 22 红细胞分布宽度(RDW-CV) | 13.8  | 11.0-16.0   | %                   |
| 8 淋巴细胞绝对值(Lym)       | 2.78     | 1.10-3.20 | 10 <sup>9</sup> /L | 23 血小板聚集率(聚集率/100) | 41.8  | 25.0-50.0   | EL                  |
| 9 单核细胞绝对值(Mon)       | 0.87     | 0.10-0.60 | 10 <sup>9</sup> /L | 24 血小板(PLT)        | 181   | 125-350     | 10 <sup>9</sup> /L  |
| 10 嗜酸性粒细胞绝对值(Eos)    | 0.68     | 0.02-0.52 | 10 <sup>9</sup> /L | 25 血小板平均体积(MPV)    | 7.8   | 6.5-12.0    | fL                  |
| 11 嗜碱性粒细胞绝对值(Bas)    | 0.07     | 0.00-0.08 | 10 <sup>9</sup> /L | 26 血小板分布宽度(PSW)    | 7.4   | 6.0-17.0    | fL                  |
| 12 *网织红细胞计数(RET)     | 0.01     | 0.00-0.20 | 10 <sup>9</sup> /L | 27 血小板压积(PCT)      | 0.149 | 0.108-0.282 | %                   |
| 13 *网织红细胞成熟指数(RETi)  | 0.0      | 0.0-2.0   | %                  | 28 大血小板比例(P-LCC)   | 14.8  | 11.0-45.0   | %                   |
| 14 *网织红细胞成熟指数比(RETi) | 0.02     | 0.00-0.20 | 10 <sup>9</sup> /L | 29 大血小板数目(P-LCC)   | 28    | 1-30        | 10 <sup>9</sup> /L  |
| 15 *网织红细胞百分率(RETi)   | 0.02-0.5 | 0.02-0.5  | %                  |                    |       |             |                     |

### Textbook

text 0.95 当需要：班上共有三个小组的汇报任务，请把汇报从班上移交给...

text 0.95 问题1：初始状态和完成状态分别是什么？

text 0.95 问题2：解决的关键是什么？

text 0.95 问题3：解决的关键是什么？

text 0.95 问题4：解决的关键是什么？

text 0.95 问题5：解决的关键是什么？

text 0.95 问题6：解决的关键是什么？

text 0.95 问题7：解决的关键是什么？

text 0.95 问题8：解决的关键是什么？

text 0.95 问题9：解决的关键是什么？

text 0.95 问题10：解决的关键是什么？

text 0.95 问题11：解决的关键是什么？

text 0.95 问题12：解决的关键是什么？

text 0.95 问题13：解决的关键是什么？

text 0.95 问题14：解决的关键是什么？

text 0.95 问题15：解决的关键是什么？

text 0.95 问题16：解决的关键是什么？

text 0.95 问题17：解决的关键是什么？

text 0.95 问题18：解决的关键是什么？

text 0.95 问题19：解决的关键是什么？

text 0.95 问题20：解决的关键是什么？

Figure S10. The Layout Detection results for various types of documents.



# V.5. Reading Order

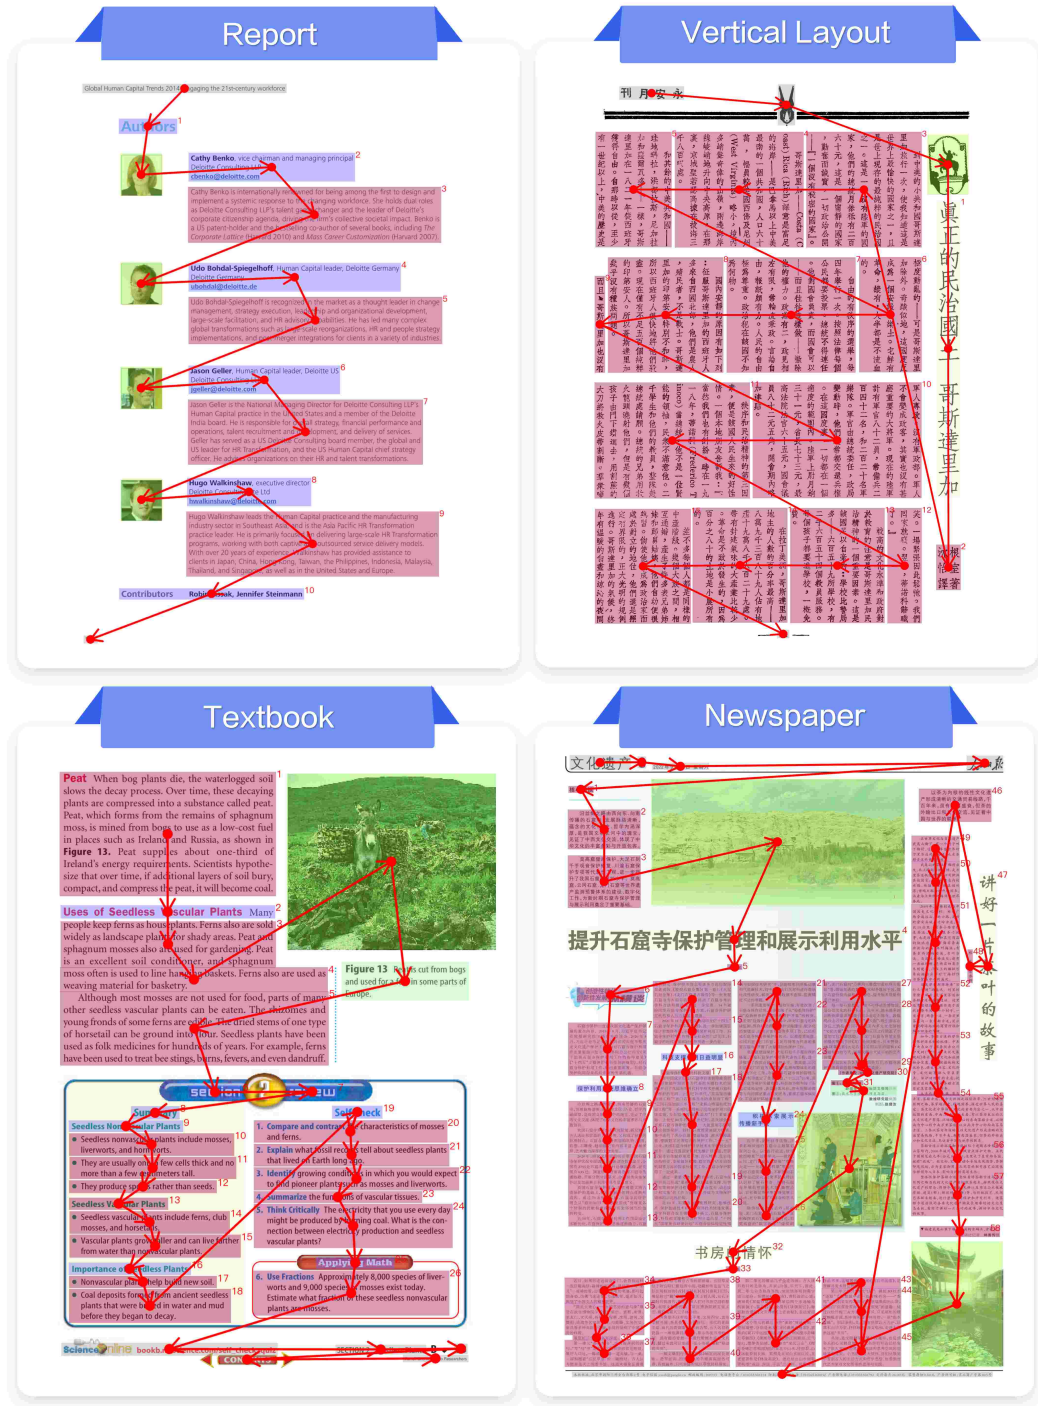

Figure S12. The Reading Order results for various types of documents.

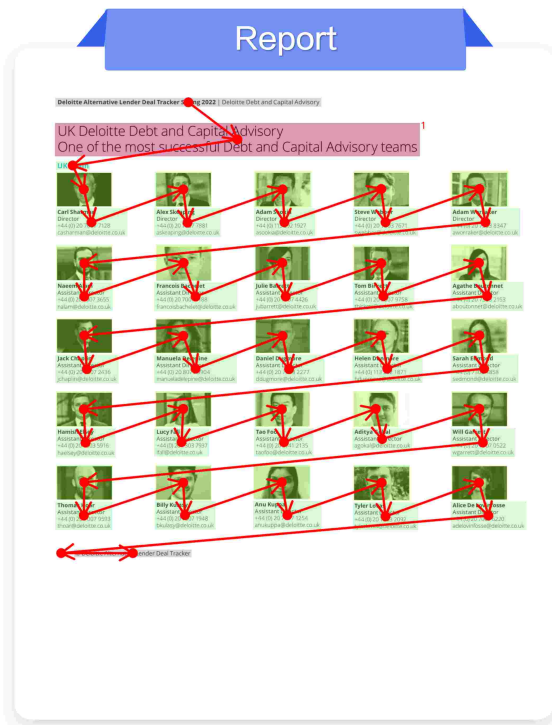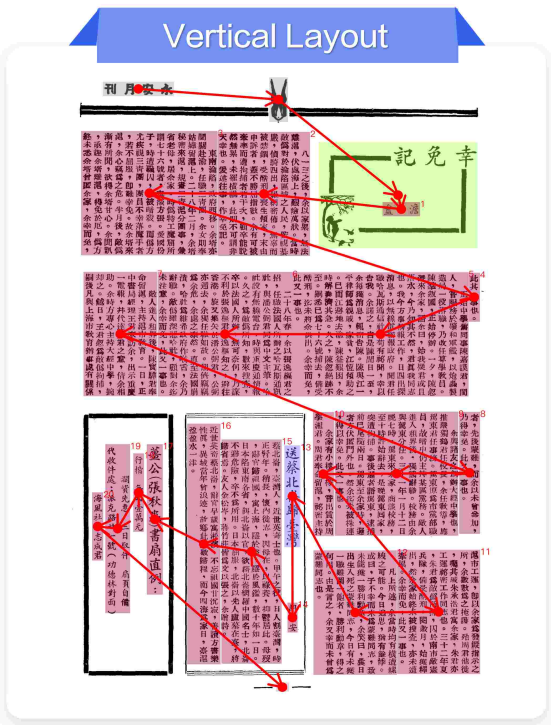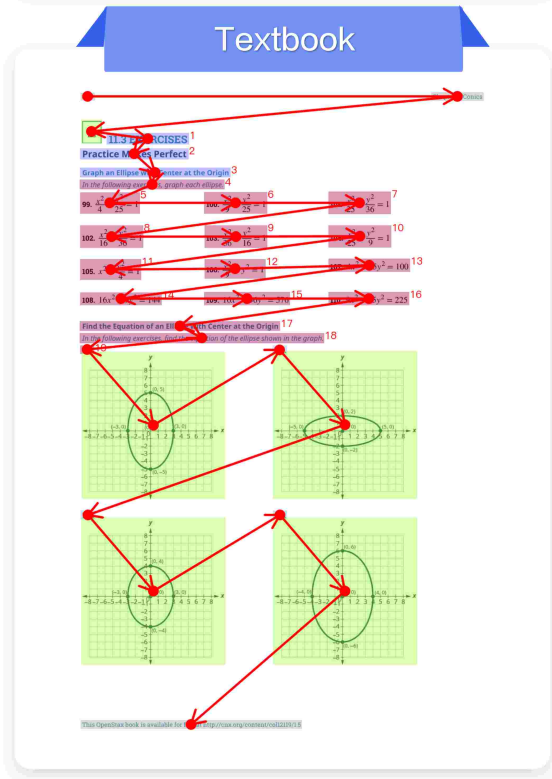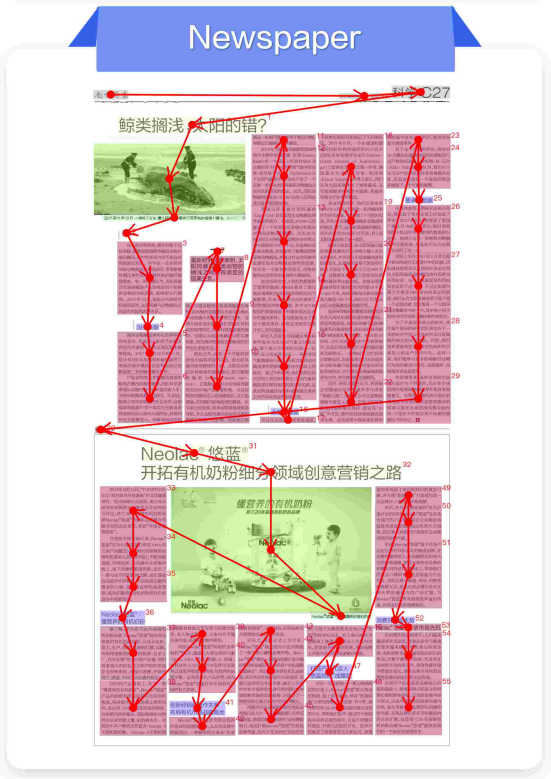

Figure S13. The Reading Order results for various types of documents.

## V.6. Text Recognition

### V.6.1. Multilingual Text Recognition

French

## Joëlle Marsot: «IL FAUT DONNER DU SENS AU TRAVAIL DE CHACUN»

### Comment bien appréhender la gestion du stress en entreprise?

S'il existe aujourd'hui de nombreuses solutions pour restreindre le stress, il faut tout d'abord comprendre que celui-ci est vécu différemment par chaque personne. Il faut donc y apporter des solutions très individuelles. Par ailleurs, s'il est clair que le stress et ses effets destructeurs sont à bannir, il faut aussi être conscient du besoin de challenges exprimé par certains salariés, dont les plus jeunes. Notre défi quotidien est de trouver ce dosage optimal, structurant, stimulant et positif qui pousse le collaborateur à donner le meilleur de lui-même, tout en lui offrant des moments de répit quand cela est nécessaire.

### «LA GESTION DU STRESS EST AUSSI DE LA RESPONSABILITÉ DE CHAQUE INDIVIDU.»

### Que peut faire l'entreprise pour créer ce climat idéal?

Elle peut jouer sur différents leviers, à commencer par la flexibilité, que ce soit des horaires ou du lieu de travail. Depuis la création de notre cabinet d'avocats en 2004, MNKS permet le télétravail et a mis en place les outils opérationnels et organisationnels pour que cela fonctionne. Un autre élément tient à la question du temps de repos. Si la loi luxembourgeoise impose un minimum de 25 jours par an, nous avons pris le pas d'aller au-delà. Un junior aura 11% de jours de congé en plus et cela peut aller jusqu'à 25 % pour un Manager. Il est également possible de transformer un bonus en jours de congé supplémentaires... Pour beaucoup, le bien-être n'est plus directement associé à la notion d'argent. La santé au travail est un autre élément à prendre en considération. De plus en plus d'entreprises mettent en place des programmes pour arrêter de fumer, perdre du poids ou simplement inciter les salariés à pratiquer une activité physique régulière. De façon plus générale, les services à la personne ont également pris de l'ampleur au cours de ces dernières années. Une conciergerie d'entreprise permet de gagner un temps précieux, libère l'esprit et vient soulager le collaborateur de ses contraintes privées ou professionnelles.

### Toutes ces mesures suffisent-elles à garantir la fin du stress?

Non, cela ne sert à rien sans une véritable culture d'entreprise et un management qui s'implique dans la relation humaine. Chez MNKS, bien que nous soyons un cabinet d'avocats avec des titres et des grades, tout le monde s'appelle par son prénom et se tutoie. Les associés ont leur bureau au milieu de leurs équipes et leur porte est toujours ouverte. L'élément déclencheur de nombreux burn-out réside dans un problème relationnel. Pour éviter cela, il est important de promouvoir un management participatif, dans un environnement collaboratif et transversal. Nous voulons que nos managers soient dans l'accompagnement, dans le mentoring et la proximité. Autre point important, nous avons abandonné tout rating de performance. Le plus important est de donner du sens au travail de chacun, sur base d'une vision stratégique claire qui permet à chacun de décliner ses propres objectifs et comprendre comment il peut y contribuer.

56 / #MAGAZINE

## Joëlle Marsot: «IL FAUT DONNER DU SENS AU TRAVAIL DE CHACUN»

### Comment bien appréhender la gestion du stress en entreprise?

S'il existe aujourd'hui de nombreuses solutions pour restreindre le stress, il faut tout d'abord comprendre que celui-ci est vécu différemment par chaque personne. Il faut donc y apporter des solutions très individuelles. Par ailleurs, s'il est clair que le stress et ses effets destructeurs sont à bannir, il faut aussi être conscient du besoin de challenges exprimé par certains salariés, dont les plus jeunes. Notre défi quotidien est de trouver ce dosage optimal, structurant, stimulant et positif qui pousse le collaborateur à donner le meilleur de lui-même, tout en lui offrant des moments de répit quand cela est nécessaire.

### «LA GESTION DU STRESS EST AUSSI DE LA RESPONSABILITÉ DE CHAQUE INDIVIDU.»

### Que peut faire l'entreprise pour créer ce climat idéal?

Elle peut jouer sur différents leviers, à commencer par la flexibilité, que ce soit des horaires ou du lieu de travail. Depuis la création de notre cabinet d'avocats en 2004, MNKS permet le télétravail et a mis en place les outils opérationnels et organisationnels pour que cela fonctionne. Un autre élément tient à la question du temps de repos. Si la loi luxembourgeoise impose un minimum de 25 jours par an, nous avons pris le pas d'aller au-delà. Un junior aura 11% de jours de congé en plus et cela peut aller jusqu'à 25 % pour un Manager. Il est également possible de transformer un bonus en jours de congé supplémentaires. Pour beaucoup, le bien-être n'est plus directement associé à la notion d'argent.

La santé au travail est un autre élément à prendre en considération. De plus en plus d'entreprises mettent en place des programmes pour arrêter de fumer, perdre du poids ou simplement inciter les salariés à pratiquer une activité physique régulière. De façon plus générale, les services à la personne ont également pris de l'ampleur au cours de ces dernières années. Une conciergerie d'entreprise permet de gagner un temps précieux, libère l'esprit et vient soulager le collaborateur de ses contraintes privées ou professionnelles.

### Toutes ces mesures suffisent-elles à garantir la fin du stress?

Non, cela ne sert à rien sans une véritable culture d'entreprise et un management qui s'implique dans la relation humaine. Chez MNKS, bien que nous soyons un cabinet d'avocats avec des titres et des grades, tout le monde s'appelle par son prénom et se tutoie. Les associés ont leur bureau au milieu de leurs équipes et leur porte est toujours ouverte. L'élément déclencheur de nombreux burn-out réside dans un problème relationnel. Pour éviter cela, il est important de promouvoir un management participatif, dans un environnement collaboratif et transversal. Nous voulons que nos managers soient dans l'accompagnement, dans le mentoring et la proximité. Autre point important, nous avons abandonné tout rating de performance. Le plus important est de donner du sens au travail de chacun, sur base d'une vision stratégique claire qui permet à chacun de décliner ses propres objectifs et comprendre comment il peut y contribuer.

Hindi

अशोक वाजपेयी की कविताओं में व्यक्तिगत या निजी संबंधों की संवेदनाओं के साथ साथ प्रकृति राग और देह की आसक्ति की संवेदनाएँ भी बार बार रेखांकित की गयी हैं। उनके काव्य संकलनों और संचयनों के निकट अध्ययन से उनमें अभिव्यक्त अनेक मौलिक विचारों, तत्वों, और प्रतिपत्तियों का संकेत मिलता है। उनमें से एक प्रतिबद्ध कवि के प्रतिपक्ष धर्मी, कला यात्री, लोक धर्मी एवं प्रजातंत्रिक प्रतिमानों के अनेक आयाम उभर आते हैं। अतः उनकी अनुभूति एवं संवेदना का धरातल विस्तृत एवं बहु आयामी है। अपने घर-परिवार, पास-पड़ोस और कस्बाई जीवन के यथार्थ अनुभवों से ही उनकी कविता प्रस्फुटित हुई है। समकालीन काव्य-तत्वों में प्रमुख मनुष्य जीवन की दुख-दुविधाओं, विषमताओं, अंतर्द्वंद्वों, संघर्षों, विचारों, अनुभवों आदि को कवि अशोक ने अपने जीवन से जोड़ कर व्यक्त किया है। उनकी कविता इस तरह वैयक्तिक, पारिवारिक, सामाजिक, राजनीतिक, सैद्धांतिक, धार्मिक, आर्थिक, प्राकृतिक, वैचारिक, दार्शनिक आदि धरातलों से होती हुई निकलती है। अशोक वाजपेयी की कविता का पार इतना विस्तृत एवं खुला है जिससे उनकी कविता आज की समकालीन कविता और अपनी पीढ़ी की कविता के बीच एक नयी भावभूमि प्रदान करती है। अशोक वाजपेयी की कविताओं में अभिव्यक्त संवेदनाओं से आम आदमी के जीवन की अनंत छवियों तक हम पहुँच पाते हैं। निम्न मध्यवर्गीय कस्बाई जीवन-परिवेश से निकली उनकी कविता संवेदना की ताज़गी एवं शिल्प विधान की मौलिकता में बेजोड़ है। उनकी कविता के बुनियादी सरोकार प्रेम, प्रकृति, रति, भाषा, मृत्यु, अनुपस्थिति आदि हैं जो मानव जीवन से संबंधित हैं। उनकी कविता में विशाल लोकानुभव, जन-जीवन के साथ उनका संबंध, लोक-व्यवहार का ज्ञान, समूची मानवीयता की पहचान, सांस्कृतिक दृष्टि, मानवीय-कुंठाओं का प्रतिफलन आदि की अभिव्यक्ति हुई है।

आम आदमी के जीवन की गति को रुकावट प्रदान करनेवाले विरोधी तत्वों से लड़ती अशोक की कविताएँ जीवन के लिए एक नया रास्ता खोल कर देती हैं। कवि का सवाल यहाँ स्पर्णीय है - 'बिना किसी को मारे जीना कितना मुश्किल है'। अशोक की कविताओं में जीवन जीने की कामना का निरपराध उत्सव भाव, देह की

अशोक वाजपेयी की कविताओं में व्यक्तिगत या निजी संबंधों की संवेदनाओं के साथ साथ प्रकृति राग और देह की आसक्ति की संवेदनाएँ भी बार बार रेखांकित की गयी हैं। उनके काव्य संकलनों और संचयनों के निकट अध्ययन से उनमें अभिव्यक्ति अनेक मौलिक विचारों, तत्वों, और प्रतिपत्तियों का संकेत मिलता है। उनमें से एक प्रतिबद्ध कवि के प्रतिपक्ष धर्मी, कला यात्री, लोक धर्मी एवं प्रजातंत्रिक प्रतिमानों के अनेक आयाम उभर आते हैं। अतः उनकी अनुभूति एवं संवेदना का धरातल विस्तृत एवं बहु आयामी है। अपने घर-परिवार, पास-पड़ोस और कस्बाई जीवन के यथार्थ अनुभवों से ही उनकी कविता प्रस्फुटित हुई है। समकालीन काव्य-तत्वों में प्रमुख मनुष्य जीवन की दुख-दुविधाओं, विषमताओं, अंतर्द्वंद्वों, संघर्षों, विचारों, अनुभवों आदि को कवि अशोक ने अपने जीवन से जोड़ कर व्यक्त किया है। उनकी कविता इस तरह वैयक्तिक, पारिवारिक, सामाजिक, राजनीतिक, सैद्धांतिक, धार्मिक, आर्थिक, प्राकृतिक, वैचारिक, दार्शनिक आदि धरातलों से होती हुई निकलती है। अशोक वाजपेयी की कविता का पार इतना विस्तृत एवं खुला है जिससे उनकी कविता आज की समकालीन कविता और अपनी पीढ़ी की कविता के बीच एक नयी भावभूमि प्रदान करती है। अशोक वाजपेयी की कविताओं में अभिव्यक्ति संवेदनाओं से आम आदमी के जीवन की अनंत छवियों तक हम पहुँच पाते हैं। निम्न मध्यवर्गीय कस्बाई जीवन-परिवेश से निकली उनकी कविता संवेदना की ताज़गी एवं शिल्प विधान की मौलिकता में बेजोड़ है। उनकी कविता के बुनियादी सरोकार प्रेम, प्रकृति, रति, भाषा, मृत्यु, अनुपस्थिति आदि हैं जो मानव जीवन से संबंधित हैं। उनकी कविता में विशाल लोकानुभव, जन-जीवन के साथ उनका संबंध, लोक-व्यवहार का ज्ञान, समूची मानवीयता की पहचान, सांस्कृतिक दृष्टि, मानवीय-कुंठाओं का प्रतिफलन आदि की अभिव्यक्ति हुई है।

आम आदमी के जीवन की गति को रुकावट प्रदान करनेवाले विरोधी तत्वों से लड़ती अशोक की कविताएँ जीवन के लिए एक नया रास्ता खोल कर देती हैं। कवि का सवाल यहाँ स्पर्णीय है - 'बिना किसी को मारे जीना कितना मुश्किल है'। अशोक की कविताओं में जीवन जीने की कामना का निरपराध उत्सव भाव, देह की

Figure S14. The markdown output for French and Hindi documents.

## Croatian

Godine 1854. na Rabu boravi još jedan bivši austrijski časnik, ilirac-preporoditelj Ivan Kukuljević Sakcinski, koji je studijski obišao i otoke Krk i Pašman, te Rijeku, Bakar, Senj, Zadar, Šibenik, Split, Klis i Omiš s Poljicima. U djelu „Izvjestje o putovanju po Dalmaciji u jeseni godine 1854. objavljenom naredne godine iskaljuje svoj bijes na odnos Austro-Ugarske prema kulturnoj baštini hrvatskog naroda, te se osvrće na zapuštene i devastirane rapske crkve i uništen mozaik u crkvi sv. Ivana Krstitelja: „Kada domoljubni Hrvat u ovu crkvu stupi, pak po prekrasnom mozaiku, sada smrdom i ruševinom pokrivenom gazeći, krasne one stupove i glavice, umjetno izrezane oltare i kipove, veličanstvene arkade i svodove, lagahne visoke prozore i kamenite grobove s latinskimi i glagolskimi napisu motri, mora da ga obuzme gorka tuga nad propašću naroda i svega toga, što mu je njegda pripadalo.“<sup>20</sup> Upravo njegova bogata zbirka spisa, isprava i rukopisa otkupljena sredstvima velikog patriota i mecene, dakovačkog biskupa Josipa Juraja Strossmayera predstavlja fundament arhiva Akademije.<sup>21</sup>

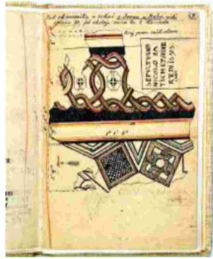

Slika 4: Fragment mozaika iz crkve sv. Ivana na Rabu, crtež Mijata Sabljara (iz BRADANOVIĆ, 2017)

Godine 1854. na Rabu boravi još jedan bivši austrijski časnik, ilirac-preporoditelj Ivan Kukuljević Sakcinski, koji je studijski obišao i otoke Krk i Pašman, te Rijeku, Bakar, Senj, Zadar, Šibenik, Split, Klis i Omiš s Poljicima. U djelu „Izvjestje o putovanju po Dalmaciji u jeseni godine 1854. objavljenom naredne godine iskaljuje svoj bijes na odnos Austro-Ugarske prema kulturnoj baštini hrvatskog naroda, te se osvrće na zapuštene i devastirane rapske crkve i uništen mozaik u crkvi sv. Ivana Krstitelja: „Kada domoljubni Hrvat u ovu crkvu stupi, pak po prekrasnom mozaiku, sada smrdom i ruševinom pokrivenom gazeći, kasne one stupove i glavice, umjetno izrezane oltare i kipove, veličanstvene arkade i svodove, lagahne visoke prozore i kamenite grobove s latinskimi i glagolskimi napisu motri, mora da ga obuzme gorka tuga nad propašću naroda i svega toga, što mu je njegda pripadalo“<sup>20</sup>. Upravo njegova bogata zbirka spisa, isprava i rukopisa otkupljena sredstvima velikog patriota i mecene, dakovačkog biskupa Josipa Juraja Strossmayera predstavlja fundament arhiva Akademije.<sup>21</sup>

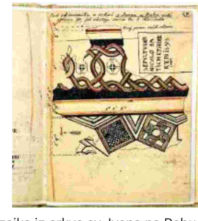

Slika 4: Fragment mozaika iz crkve sv. Ivana na Rabu, crtež Mijata Sabljara (iz BRADANOVIĆ, 2017)

## Spanish

### Concursos de obra realizada El estado de la arquitectura

Arq. María Samaniego

**María Samaniego Ponce** (Quito, Ecuador) es arquitecta ecuatoriana, egresada de la Facultad de Arquitectura y Urbanismo de la Universidad Central del Ecuador. Tiene vasta experiencia en diseño urbano y arquitectónico, conferencia invitada a nivel nacional e internacional en la Bienal de Arquitectura de Quito, dos nominaciones al Premio Mies van der Rohe de Arquitectura Latinoamericana, Finalista en V Bienal Iberoamericana de Arquitectura y Urbanismo Montevideo, mención de Honor American Architecture Prize 2017, Langlist Deseen Awards 2018, y finalista en los premios Architizer A+ Firm Awards categoría Mejor de América del Sur y Central, 2021. Ha sido jurado de varios premios de arquitectura. También fue la presidenta de la Bienal Panamericana de Arquitectura de Quito 2018 y BAQ 2020, de Doceano Ecuador desde 2017, miembro del consejo técnico de apoyo para el inventario y protección de los bienes inmuebles de arquitectura moderna del Ecuador del Ministerio de Cultura y Patrimonio, coordinadora de bienales y congresos de la FPA, 2021-2024, presidenta del colegio de arquitectos de su país y de su núcleo Pichincha.

En un escenario arquitectónico global en el que cada vez nos vemos más abocados a un sinnfin de investigaciones, artículos, teorías y textos académicos, trabajos de aula o de escritorio y no "del hacer", se aplaude la iniciativa de realizar los concursos, exposiciones o discusiones sobre la obra construida, el quehacer de nuestro oficio de arquitectos.

Sin de ninguna manera restar importancia a todas las actividades académicas, al análisis y construcción del pensamiento sobre la arquitectura y la ciudad, los espacios de confrontación de la obra arquitectónica resultan imprescindibles. Haciendo un símil con la razón fundamental en base a la que surgieron las bienales de arte, de ser espacios de exposición a gran escala y sin un fin mercantilista, que evidencian el estado del arte en ese momento, las exposiciones o concursos de obra arquitectónica realizada nos dejan ver el estado de la arquitectura.

La convocatoria realizada por la Sociedad de Arquitectos del Uruguay SAU para el 2021 fue sin duda un acierto, demostrado por la gran respuesta de proyectos participantes en las distintas categorías. Tuve el honor de formar parte del equipo de jurados integrado por Héctor

Berio y Fernando Giordano, con el acompañamiento de Cristina Bausero. Nos encomendaron juzgar la Categoría 4: edificios administrativos, institucionales y corporativos, y la Categoría 5: arquitectura para el trabajo, la producción y los servicios.

Es usual encontrarse con una gran diversidad de propuestas, diferentes escalas, lugares de implantación, usos; sin embargo, la búsqueda por parte de los jurados de una calidad arquitectónica y de una apropiada respuesta a su contexto -físico, social, cultural, etc.- fue constante. Ser jurado internacional supone cierta dificultad, al no conocer de primera mano los edificios sino limitarse a los paneles e información presentada; pero también puede ser una ventaja al tener una mirada tal vez más objetiva y una perspectiva desde fuera.

Las interesantes y profundas reuniones de deliberación, alimentadas por estas coincidentes y también diferentes condiciones y visiones, fueron un espacio propicio para concluir que, a pesar de la diferencia de latitudes, una arquitectura de calidad hecha con rigor y de manera responsable siempre tendrá un carácter universal.

### Concursos de obra realizada

El estado de la arquitectura

Arq. María Samaniego

María Samaniego Ponce (Quito, Ecuador) es arquitecta ecuatoriana, egresada de la Facultad de Arquitectura y Urbanismo de la Universidad Central del Ecuador. Tiene vasta experiencia en diseño urbano y arquitectónico, conferencia invitada a nivel nacional e internacional en la Bienal de Arquitectura de Quito, dos nominaciones al Premio Mies van der Rohe de Arquitectura Latinoamericana, Finalista en V Bienal Iberoamericana de Arquitectura y Urbanismo Montevideo, mención de Honor American Architecture Prize 2017, Langlist Deseen Awards 2018, y finalista en los premios Architizer A+ Firm Awards categoría Mejor de América del Sur y Central, 2021. Ha sido jurado de varios premios de arquitectura. También fue la presidenta de la Bienal Panamericana de Arquitectura de Quito 2018 y BAQ 2020, de Doceano Ecuador desde 2017, miembro del consejo técnico de apoyo para el inventario y protección de los bienes inmuebles de arquitectura moderna del Ecuador del Ministerio de Cultura y Patrimonio, coordinadora de bienales y congresos de la FPA, 2021-2024, presidenta del colegio de arquitectos de su país y de su núcleo Pichincha.

En un escenario arquitectónico global en el que cada vez nos vemos más abocados a un sinnfin de investigaciones, artículos, teorías y textos académicos, trabajos de aula o de escritorio y no "del hacer", se aplaude la iniciativa de realizar los concursos, exposiciones o discusiones sobre la obra construida, el quehacer de nuestro oficio de arquitectos.

Sin de ninguna manera restar importancia a todas las actividades académicas, al análisis y construcción del pensamiento sobre la arquitectura y la ciudad, los espacios de confrontación de la obra arquitectónica resultan imprescindibles. Haciendo un símil con la razón fundamental en base a la que surgieron las bienales de arte, de ser espacios de exposición a gran escala y sin un fin mercantilista, que evidencian el estado del arte en ese momento, las exposiciones o concursos de obra arquitectónica realizada nos dejan ver el estado de la arquitectura.

La convocatoria realizada por la Sociedad de Arquitectos del Uruguay SAU para el 2021 fue sin duda un acierto, demostrado por la gran respuesta de proyectos participantes en las distintas categorías. Tuve el honor de formar parte del equipo de jurados integrado por Héctor Berio y Fernando Giordano, con el acompañamiento de Cristina Bausero. Nos encomendaron juzgar la Categoría 4: edificios administrativos, institucionales y corporativos, y la Categoría 5: arquitectura para el trabajo, la producción y los servicios.

Es usual encontrarse con una gran diversidad de propuestas, diferentes escalas, lugares de implantación, usos; sin embargo, la búsqueda por parte de los jurados de una calidad arquitectónica y de una apropiada respuesta a su contexto -físico, social, cultural, etc.- fue constante. Ser jurado internacional supone cierta dificultad, al no conocer de primera mano los edificios sino limitarse a los paneles e información presentada; pero también puede ser una ventaja al tener una mirada tal vez más objetiva y una perspectiva desde fuera.

Las interesantes y profundas reuniones de deliberación, alimentadas por estas coincidentes y también diferentes condiciones y visiones, fueron un espacio propicio para concluir que, a pesar de la diferencia de latitudes, una arquitectura de calidad hecha con rigor y de manera responsable siempre tendrá un carácter universal.

Figure S15. The markdown output for Croatian and Spanish documents.

## English

yet there remains a gap between academic research prototypes and production-ready systems capable of supporting the stringent requirements of dataset construction, RAG workflows, and large-scale document intelligence.

### PaddleOCR 1.x & 2.x: Advancements and Innovations in Open-Source OCR Technology

PaddleOCR has emerged as a prominent open-source project addressing these multifaceted challenges. Since its initial release in 2020, PaddleOCR has adhered to the principles of comprehensive coverage, end-to-end workflow, and lightweight efficiency, setting new standards for both usability and technical excellence in the OCR domain. Anchored by the PP-OCR series, PaddleOCR has evolved through multiple iterations—each pushing the boundaries of text detection, recognition, and document analysis. Early versions such as PP-OCRv1 (Du et al., 2020) focused on achieving an optimal balance between accuracy and speed, making OCR accessible for resource-constrained environments. Subsequent releases (PP-OCRv2 (Du et al., 2021), v3 (Li et al., 2022b), and v4) incrementally improved recognition performance, extended language coverage, and introduced sophisticated models for handwriting and rare character recognition. A notable advancement has been the integration of document structural understanding via the PP-Structure series, enabling PaddleOCR to move beyond text lines and paragraphs to address complex layout analysis, table structure recognition (e.g., SLANet (Li et al., 2022a)), and other advanced parsing tasks. These capabilities have made PaddleOCR a critical engine for automated document processing, intelligent archiving, information extraction, and, increasingly, for supporting the data pipelines of LLMs and RAG systems.

The adoption and impact of PaddleOCR in both academic and industrial communities are evidenced by its widespread use and vibrant developer ecosystem. With more than 50,000 stars on GitHub as of June 2025, and its deployment as the core OCR engine in projects such as MinerU (Wang et al., 2024), RAGFlow (KevinHuSH, 2023), and UmiOCR (hirai sora, 2022), PaddleOCR has become an indispensable tool for digitization initiatives, knowledge management platforms, and AI-driven document analysis workflows. Notably, PaddleOCR has played a central role in the construction of high-quality document datasets for large model training, enabling researchers to assemble diverse, accurately annotated corpora spanning multiple languages, domains, and document types. Its modular architecture and rich API ecosystem facilitate seamless integration with RAG pipelines, where efficient and accurate OCR is essential for document ingestion, retrieval indexing, and context provision to generative models.

As PaddleOCR's user base has expanded, so has the range of feedback and requirements from the community. Users have highlighted persistent needs in areas such as robust handwriting recognition, improved support for multi-language and rare script recognition, more powerful document parsing for complex layouts, and advanced key information extraction. These demands are further amplified by the growing scale and dynamism of LLM and RAG applications, where the ability to extract, structure, and semantically interpret information from diverse documents is a prerequisite for building reliable, responsive, and intelligent systems. Aware of these trends and our responsibility as a leading open-source platform, we remain committed to continuously improving PaddleOCR to meet the evolving challenges of the field.

### PaddleOCR 3.0: A New Milestone in Enhancing Text Recognition and Document Parsing

In this context, we introduce PaddleOCR 3.0, a major release designed to systematically enhance text recognition accuracy and document parsing capabilities, with a particular focus on the complex scenarios encountered in modern AI applications. PaddleOCR 3.0 encompasses several core innovations. First, it presents the high-precision text recognition pipeline PP-OCRv3, which leverages advanced model architectures and training strategies to deliver state-of-the-

yet there remains a gap between academic research prototypes and production-ready systems capable of supporting the stringent requirements of dataset construction, RAG workflows, and large-scale document intelligence.

### PaddleOCR 1.x & 2.x: Advancements and Innovations in Open-Source OCR Technology

PaddleOCR has emerged as a prominent open-source project addressing these multifaceted challenges. Since its initial release in 2020, PaddleOCR has adhered to the principles of comprehensive coverage, end-to-end workflow, and lightweight efficiency, setting new standards for both usability and technical excellence in the OCR domain. Anchored by the PP-OCR series, PaddleOCR has evolved through multiple iterations—each pushing the boundaries of text detection, recognition, and document analysis. Early versions such as PP-OCRv1 (Du et al., 2020) focused on achieving an optimal balance between accuracy and speed, making OCR accessible for resource-constrained environments. Subsequent releases (PP-OCRv2 (Du et al., 2021), v3 (Li et al., 2022b), and v4) incrementally improved recognition performance, extended language coverage, and introduced sophisticated models for handwriting and rare character recognition. A notable advancement has been the integration of document structural understanding via the PP-Structure series, enabling PaddleOCR to move beyond text lines and paragraphs to address complex layout analysis, table structure recognition (e.g., SLANet (Li et al., 2022a)), and other advanced parsing tasks. These capabilities have made PaddleOCR a critical engine for automated document processing, intelligent archiving, information extraction, and, increasingly, for supporting the data pipelines of LLMs and RAG systems.

The adoption and impact of PaddleOCR in both academic and industrial communities are evidenced by its widespread use and vibrant developer ecosystem. With more than 50,000 stars on GitHub as of June 2025, and its deployment as the core OCR engine in projects such as MinerU (Wang et al., 2024), RAGFlow (KevinHuSH, 2023), and UmiOCR (hirai sora, 2022), PaddleOCR has become an indispensable tool for digitization initiatives, knowledge management platforms, and AI-driven document analysis workflows. Notably, PaddleOCR has played a central role in the construction of high-quality document datasets for large model training, enabling researchers to assemble diverse, accurately annotated corpora spanning multiple languages, domains, and document types. Its modular architecture and rich API ecosystem facilitate seamless integration with RAG pipelines, where efficient and accurate OCR is essential for document ingestion, retrieval indexing, and context provision to generative models.

As PaddleOCR's user base has expanded, so has the range of feedback and requirements from the community. Users have highlighted persistent needs in areas such as robust handwriting recognition, improved support for multi-language and rare script recognition, more powerful document parsing for complex layouts, and advanced key information extraction. These demands are further amplified by the growing scale and dynamism of LLM and RAG applications, where the ability to extract, structure, and semantically interpret information from diverse documents is a prerequisite for building reliable, responsive, and intelligent systems. Aware of these trends and our responsibility as a leading open-source platform, we remain committed to continuously improving PaddleOCR to meet the evolving challenges of the field.

### PaddleOCR 3.0: A New Milestone in Enhancing Text Recognition and Document Parsing

In this context, we introduce PaddleOCR 3.0, a major release designed to systematically enhance text recognition accuracy and document parsing capabilities, with a particular focus on the complex scenarios encountered in modern AI applications. PaddleOCR 3.0 encompasses several core innovations. First, it presents the high-precision text recognition pipeline PP-OCRv3, which leverages advanced model architectures and training strategies to deliver state-of-the-art results.

## Arabic

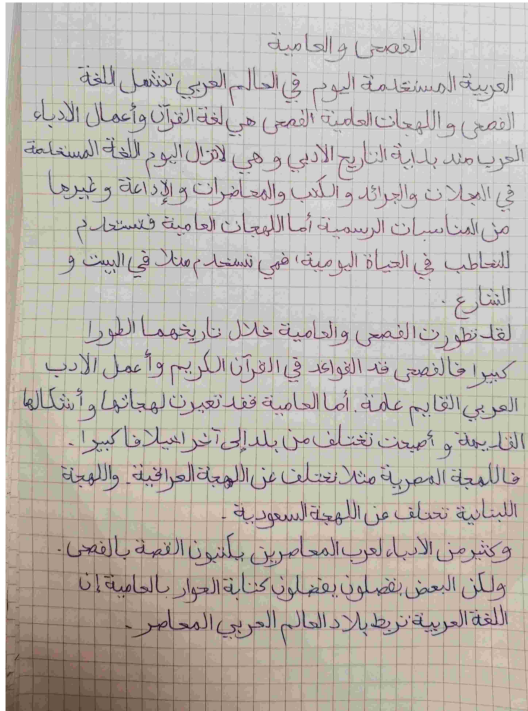

العصر  
العربية المستخدمة اليوم في العالم العربي تنفصل اللغة  
الفصحى واللهجات العلمية الفصحى هي لغة القرآن وأعمال الأدباء  
العرب منذ بداية التاريخ الأدبي وهي لازال اليوم اللغة المستخدمة  
في المجالات والجراند والكتب والمحاضرات والإذاعة وغيرها  
مُ التماثلات الرسمية أما اللهجات العامية فستُستخدم  
للحاطب في الحياة اليومية، فهي تستخدم منتج في البيت و  
لتنظون النصى والحامية خلال نار يخهما الطورا  
كبيراً فالفصحى فند القواعد في القرآن الكريم وأعمل الادب  
العربي القابم طمة، أما الحامية فقد تعبرت لهجاتها وأشكالها  
الناس يجب وأصبحت تختلف من بلد إلى أخراه بلافا كبراً .  
فاللهجة المصرية مثلاً تختلف عن اللهجة المصرية واللهجة  
البيانية تحالف من الإهجة السعودية .  
وكثير من الأدباء لعرب المعاصرين يكونون القصة بالفصحى  
ولكن البعض يقضون بعض الآ كناية الجوار بالحامية إن  
لغة العربية نرطب بلاد العالم العربي المعاصر

Figure S16. The markdown output for English and Arabic documents.

目录  
1

**Inhaltsverzeichnis**

Einleitung..... 1

Die vier Gesetze für eine gelungene Ausdrucksweise ..... 4

Erstes Gesetz ..... 5

Auf nonverbale Kommunikation achten ..... 5

1.1 Die Macht der Stimme ..... 6

1.2 Pausen und Sprechtempo geben den Takt vor ..... 10

1.3 Körpersprache und Überzeugungswirkung ..... 13

1.3.1 Gestik und Mimik – Spiegelbilder unseres Innenlebens ..... 17

1.3.2 Körperhaltung gibt Halt ..... 23

1.3.3 Körperbewegung bringt Dynamik ..... 29

1.3.4 Nonverbale Signale entschlüsseln ..... 33

Zweites Gesetz ..... 38

Auf eine positive Ausdrucksweise achten ..... 38

2.1 Konstruktive Kritik äußern ..... 39

2.2 Die Macht der positiven Worte ..... 50

2.3 Wortschatz erweitern ..... 62

Drittes Gesetz ..... 74

Sich zielgerichtet und prägnant ausdrücken ..... 74

3.1 Die Sprache der Überzeugung ..... 76

3.2 Zuhörer in den Bann ziehen ..... 89

3.3 Einfluss nutzen ..... 96

3.4 Schlagfertigkeit beweisen ..... 104

**Inhaltsverzeichnis**

Einleitung...1

Die vier Gesetze für eine gelungene Ausdrucksweise ...4

Erstes Gesetz...5

Auf nonverbale Kommunikation achten...5

1.1 Die Macht der Stimme...6

1.2 Pausen und Sprechtempo geben den Takt vor...10

1.3 Körpersprache und Überzeugungswirkung...13

1.3.1 Gestik und Mimik – Spiegelbilder unseres Innenlebens...17

1.3.2 Körperhaltung gibt Halt...23

1.3.3 Körperbewegung bringt Dynamik...29

1.3.4 Nonverbale Signale entschlüsseln...33

Zweites Gesetz...38

Auf eine positive Ausdrucksweise achten...38

2.1 Konstruktive Kritik äußern...39

2.2 Die Macht der positiven Worte...50

2.3 Wortschatz erweitern...62

Drittes Gesetz...74

Sich zielgerichtet und prägnant ausdrücken...74

3.1 Die Sprache der Überzeugung...76

3.2 Zuhörer in den Bann ziehen...89

3.3 Einfluss nutzen...96

3.4 Schlagfertigkeit beweisen...104

2025 年全国高中数学联赛江西省预赛

试题参考答案

(6月22日上午9:30—12:00)

一、填空题(每小题7分,共56分)

1. 若圆  $C_1: x^2 + y^2 - 2x - 2y = 6$  与圆  $C_2: x^2 + y^2 - 4x - 4y = k$  有唯一交点, 则  $k =$  \_\_\_\_\_.

答案: -6 或 10.

解: 由题圆  $C_1: (x-1)^2 + (y-1)^2 = (2\sqrt{2})^2$ , 圆  $C_2: (x-2)^2 + (y-2)^2 = k+8$ , 题设等价于圆  $C_2$  的半径分别为  $\sqrt{2}$  或  $3\sqrt{2}$ , 所以  $k+8=2$  或  $18$ , 所以  $k=-6$  或  $10$ .

2. 设复数  $z$  满足  $(1+2i)z = |3-4i|$ , 则  $(1+\bar{z})^2$  的值为 \_\_\_\_\_.

答案:  $-16+16i$ .

解: 由题  $z = \frac{5}{1+2i} = 1-2i$ , 所以  $(1+\bar{z})^2 = (2+2i)^2 = 8i \cdot (2+2i) = -16+16i$ .

3. 半径为  $\sqrt{6}$  的大球内部装四个半径相等的小球, 则小球的半径为 \_\_\_\_\_.

答案:  $6-2\sqrt{6}$ .

解: 由题知小球半径最大时四个小球的球心构成一个正三棱锥  $A-BCD$  且小球内切于大球, 大球球心为正三棱锥  $A-BCD$  的中心. 如图 1, 为便于计算边长比, 先设正三棱锥的棱长为 6, 容易计算得  $OA = \frac{3\sqrt{6}}{2}$ , 故大球与小球的半径比为  $\frac{3\sqrt{6}+3}{2} = \frac{\sqrt{6}+2}{2}$ , 故小球的半径为  $\frac{2\sqrt{6}}{\sqrt{6}+2} = 6-2\sqrt{6}$ .

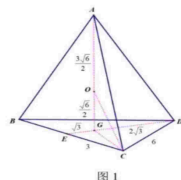

4. 函数  $f(x) = \cos(\omega x + \frac{\pi}{4})$  ( $\omega > 0$ ),  $x = \frac{\pi}{4}$  是函数的一个零点,  $x = -\frac{\pi}{4}$  是函数图像的一条对称轴,  $(\frac{\pi}{12}, \frac{\pi}{9})$  是  $f(x)$  的一个单调区间, 则  $\omega$  的最大值为 \_\_\_\_\_.

2025 年全国高中数学联赛江西省预赛

试题参考答案

(6月22日上午9:30-12:00)

一、填空题(每小题7分,共56分)

1. 若圆  $C_1: x^2 + y^2 - 2x - 2y = 6$  与圆  $C_2: x^2 + y^2 - 4x - 4y = k$  有唯一交点, 则  $k =$  \_\_\_\_\_.

答案: -6 或 10.

解: 由题圆  $C_1: (x-1)^2 + (y-1)^2 = (2\sqrt{2})^2$ , 圆  $C_2: (x-2)^2 + (y-2)^2 = k+8$ , 题设等价于圆  $C_2$  的半径分别为  $\sqrt{2}$  或  $3\sqrt{2}$ , 所以  $k+8=2$  或  $18$ , 所以  $k=-6$  或  $10$ .

2. 设复数  $z$  满足  $(1+2i)z = |3-4i|$ , 则  $(1+\bar{z})^2$  的值为 \_\_\_\_\_.

答案:  $-16+16i$ .

解: 由题  $z = \frac{5}{1+2i} = 1-2i$ , 所以  $(1+\bar{z})^2 = (2+2i)^2 = 8i \cdot (2+2i) = -16+16i$ .

3. 半径为  $\sqrt{6}$  的大球内部装四个半径相等的小球, 则小球的半径为 \_\_\_\_\_.

答案:  $6-2\sqrt{6}$ .

解: 由题知小球半径最大时四个小球的球心构成一个正三棱锥  $A-BCD$  且小球内切于大球, 大球球心为正三棱锥  $A-BCD$  的中心. 如图 1, 为便于计算边长比, 先设正三棱锥的棱长为 6, 容易计算得  $OA = \frac{3\sqrt{6}}{2}$ , 故大球与小球的半径比为  $\frac{3\sqrt{6}+3}{2} = \frac{\sqrt{6}+2}{2}$ , 故小球的半径为  $\frac{2\sqrt{6}}{\sqrt{6}+2} = 6-2\sqrt{6}$ .

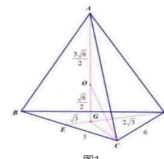

4. 函数  $f(x) = \cos(\omega x + \frac{\pi}{4})$  ( $\omega > 0$ ),  $x = \frac{\pi}{4}$  是函数的一个零点,  $x = -\frac{\pi}{4}$  是函数图像的一条对称轴,  $(\frac{\pi}{12}, \frac{\pi}{9})$  是  $f(x)$  的一个单调区间, 则  $\omega$  的最大值为 \_\_\_\_\_.

Figure S17. The markdown output for German and Chinese documents.

Russian

обществ. Первое в истории научное географическое общество (Société de Géographie), главная цель которого способствовать развитию научной географии, основано в 1821 г. в Париже. В это время в связи с расширением колониальной экспансии государств континента в Европе возрастает неподдельный интерес к другим территориям. С 1822 г. издается «Информационный бюллетень географического общества» (фр. «Bulletin de la Société de Géographie»). Впоследствии модель Французского географического общества становится эталоном для создания подобных организаций.

Так, в 1828 г. открывается географическое общество (Gesellschaft für Erdkunde) в Берлине, которое с 1853 г. начинает издавать научный журнал «Земля» («Die Erde»). В 1830 г. в Лондоне основано Королевское географическое общество (Royal Geographical Society) в целях исследования и популяризации географии как науки.

В 1845 г. создается Русское географическое общество, которое охарактеризовано известным географом, путешественником и государственным деятелем П.П. Семеновым-Тянь-Шанским как «свободная и открытая для всех, кто проникнут любовью к родной земле и глубокой, несокрушимой верой в будущее Русского государства и русского народа, корпорация» (цит. по: [5, URL]). С 1865 г. по настоящее время обществом издается научный журнал «Известия Русского географического общества».

В 1888 г. в Вашингтоне в целях «расширения и распространения географических знаний» («for the increase and diffusion of geographical knowledge» [12, p. 14], перевод наш. — Н. Г.) среди массовой аудитории создается Национальное географическое общество (National Geographic Society). Этот фундаментальный принцип, определяющий дальнейшую политику Национального географического общества, был заложен его первым президентом Г.Г. Хаббардом (Gardiner Greene Hubbard, 1822–1897). В октябре 1888 г. для распространения географических знаний Национальное географическое общество выпускает научный журнал National Geographic [19, с. 369].

Становится естественным и необходимым процессом обмен мнениями о последних достижениях географической науки, в связи с чем растет межкультурная научная коммуникация [11, с. 37], письменная форма которой представлена изданиями первых географических обществ. Это сугубо научные географические издания, ориентированные на узкоспециализированную аудиторию — профессионалов. Первоначально в них публикуются только хроникальные сообщения, сведения о новых книгах и выдержки из них. Отражение результатов научных исследований носит предварительный характер и выражено в традиционной форме писем. Интересом к научным открытиям со стороны простых граждан, вызванным ростом гражданского самосознания [11, с. 37], обусловлено издание не только научных, но и научно-популярных географических журналов, рассчитанных на широкую аудиторию.

обществ. Первое в истории научное географическое общество (Société de Géographie), главная цель которого способствовать развитию научной географии, основано в 1821 г. в Париже. В это время в связи с расширением колониальной экспансии государств континента в Европе возрастает неподдельный интерес к другим территориям. С 1822 г. издается «Информационный бюллетень географического общества» (фр. «Bulletin de la Société de Géographie»). Впоследствии модель Французского географического общества становится эталоном для создания подобных организаций.

Так, в 1828 г. открывается географическое общество (Gesellschaft für Erdkunde) в Берлине, которое с 1853 г. начинает издавать научный журнал «Земля» («Die Erde»). В 1830 г. в Лондоне основано Королевское географическое общество (Royal Geographical Society) в целях исследования и популяризации географии как науки.

В 1845 г. создается Русское географическое общество, которое охарактеризовано известным географом, путешественником и государственным деятелем П.П. Семеновым-Тянь-Шанским как «свободная и открытая для всех, кто проникнут любовью к родной земле и глубокой, несокрушимой верой в будущее Русского государства и русского народа, корпорация» (цит. по: [5, URL]). С 1865 г. по настоящее время обществом издается научный журнал «Известия Русского географического общества».

В 1888 г. в Вашингтоне в целях «расширения и распространения географических знаний» («for the increase and diffusion of geographical knowledge» [12, p. 14], перевод наш. — Н. Г.) среди массовой аудитории создается Национальное географическое общество (National Geographic Society). Этот фундаментальный принцип, определяющий дальнейшую политику Национального географического общества, был заложен его первым президентом Г.Г. Хаббардом (Gardiner Greene Hubbard, 1822–1897). В октябре 1888 г. для распространения географических знаний Национальное географическое общество выпускает научный журнал National Geographic [19, с. 369].

Становится естественным и необходимым процессом обменениями о последних достижениях географической науки, в связи с чем растет межкультурная научная коммуникация [11, с. 37], письменная форма которой представляет изданиями первых географических обществ. Это сугубо научные географические издания, ориентированные на узкоспециализированную аудиторию — профессионалов. Первоначально в них публикуются только хроникальные сообщения, сведения о новых книгах и выдержки из них. Отражение результатов научных исследований носит предварительный характер и выражено в традиционной форме писем. Интересом к научным открытиям со стороны простых граждан, вызванным ростом гражданского самосознания [11, с. 37], обусловлено издание не только научных, но и научно-популярных географических журналов, рассчитанных на широкую аудиторию.

Japanese

より詳しく知りたい方へ

～県立図書館にある今回の展示資料～

\*雑誌:発行年月 題名 巻号 出版年 出版者(創刊号は創刊当時の出版者) リスト掲載の雑誌は貸出ができませんが、複写が可能です。  
\*図書:『書名』著者名 発行者 出版年 所蔵館【県立図書館の請求記号】  
※以下に掲載した資料は、県立熊谷図書館2階ロビーで8月25日(日)まで展示中です。

◆ 創刊雑誌に関する図書

『創刊号のパノラマ』(うらわ美術館/編 岩波書店 2004.9)【R027.5/ツウ】  
『時代を創った編集者 101』(寺田博/編 新書館 2003.8)【O21.43/ツウ】  
『日本雑誌協会史 第1部』(日本雑誌協会/編 日本雑誌協会 1968)【O50/.N71/】  
『日本雑誌協会史 第2部』(日本雑誌協会/編 日本雑誌協会 1969)【O50/.N71/】  
『雑誌大研究』(斎藤精一/著 日本工業新聞社 1979.2)【O51/ツウ】  
『雑誌 100年の歩み』(塩沢実信/著 グリーンアロー出版社 1994.9)【O51/ツウ】  
『雑誌の死に方』(浜崎広/著 出版ニュース社 1998.3)【O51/ツウ】  
『雑誌は見ていた。』(植田康夫/著 水曜社 2009.11)【O51/ツウ】  
『創刊号に輝いた十人の編集者』(塩沢実信/著 流通出版 1981.4)【O51/ツウ】  
『創刊誌大研究』(植本彦利/著 大陸書房 1982.11)【O51/ツウ】  
『創刊の社会史』(津波功士/著 筑摩書房 2009.1)【O51/ツウ】  
『古雑誌研究』(小田光雄/著 雄創社 2009.4)【O51/ツウ】  
『ミリオンセラー誕生へ!』(印刷博物館/編著 東京書籍 2008.9)【O51/ツウ】

◆ 明治

(雑誌)  
『園遊珍聞』1号(明治10年3月)珍聞館(複製版 本邦書籍)  
『出版月評』1号(明治20年8月)月評社(複製版 龍溪書舎)  
『龍門雑誌』1号(明治21年4月)龍門社  
『図書館雑誌』1号(明治40年10月)日本図書館協会(複製版 学術文献普及会)  
『中央公論』25年5号(明治43年5月)反骨社(図書)  
『中央公論』100年を祝む』(三浦典門/著 中央公論社 1986.8)【O51.3/2】  
『明治大雑誌』(流通出版 1978.12)【O51/ツウ】  
『明治大雑誌』(山室信一/校注 岩波書店 1999.5)【B051.1/4/1】

◆ 大正

(雑誌)  
『思潮』創刊号(大正6年5月)(岩波書店)(複製版)  
『思想』1号(大正10年10月)(岩波書店)(複製版)  
『種籟く人』創刊号(大正10年10月)(種籟社)(複製版 ほんぶ出版)

より詳しく知りたい方へ

～県立図書館にある今回の展示資料～

\*雑誌:発行年月 題名 巻号 出版年 出版者(創刊号は創刊当時の出版者) リスト掲載の雑誌は貸出ができませんが、複写が可能です。  
\*図書:『書名』著者名 発行者 出版年 所蔵館【県立図書館の請求記号】  
※以下に掲載した資料は、県立熊谷図書館2階ロビーで8月25日(日)まで展示中です。

創刊雑誌に関する図書

『創刊号のパノラマ』(うらわ美術館/編 岩波書店 2004.9)【R027.5/ツウ】  
『時代を創った編集者 101』(寺田博/編 新書館 2003.8)【O21.43/ツウ】  
『日本雑誌協会史 第1部』(日本雑誌協会/編 日本雑誌協会 1968)【O50/N71】  
『日本雑誌協会史 第2部』(日本雑誌協会/編 日本雑誌協会 1969)【O50/N71】  
『雑誌大研究』(斎藤精一/著 日本工業新聞社 1979.2)【O51/ツウ】  
『雑誌 100年の歩み』(塩沢実信/著 グリーンアロー出版社 1994.9)【O51/ツウ】  
『雑誌の死に方』(浜崎広/著 出版ニュース社 1998.3)【O51/ツウ】  
『雑誌は見ていた。』(植田康夫/著 水曜社 2009.11)【O51/ツウ】  
『創刊号に輝いた十人の編集者』(塩沢実信/著 流通出版 1981.4)【O51/ツウ】  
『創刊誌大研究』(植本彦利/著 大陸書房 1982.11)【O51/ツウ】  
『創刊の社会史』(津波功士/著 筑摩書房 2009.1)【O51/ツウ】  
『古雑誌研究』(小田光雄/著 雄創社 2009.4)【O51/ツウ】  
ミリオンセラー誕生へ!』(印刷博物館/編著 東京書籍 2008.9)【O51/ツウ】

◆ 明治

(雑誌)  
『園遊珍聞』1号(明治10年3月)珍聞館(複製版 本邦書籍)  
『出版月評』1号(明治20年8月)月評社(複製版 龍溪書舎)  
『龍門雑誌』1号(明治21年4月)龍門社  
『図書館雑誌』1号(明治40年10月)日本図書館協会(複製版 学術文献普及会)  
中央公論 25年5号(明治43年5月)反骨社(図書)  
中央公論 100年を祝む』(三浦典門/著 中央公論社 1986.8)【O51.3/2】  
明治大雑誌』(流通出版 1978.12)【O51/ツウ】  
『明治大雑誌』(山室信一/校注 岩波書店 1999.5)【B051.1/4/1】

◆ 大正

(雑誌)  
『思潮』創刊号(大正6年5月)(岩波書店)(複製版)  
『思想』1号(大正10年10月)(岩波書店)(複製版)  
『種籟く人』創刊号(大正10年10月)(種籟社)(複製版 ほんぶ出版)

Figure S18. The markdown output for Russian and Japanese documents.

1. บทนำ

เป้าหมายการพัฒนาที่ยั่งยืน (Sustainable development goals (SDGs) มีความสำคัญกับการสร้างหลักประกันการมีสุขภาพที่ดีและส่งเสริมความเป็นอยู่ที่ดีสำหรับทุกคนในช่วงวัย ซึ่งมีเป้าหมายครอบคลุมในหลายประเด็นด้านสุขภาพและความเป็นอยู่ที่ดี โดยมีนโยบายการสร้างและรักษากำลังคนด้านสุขภาพและเสริมขีดความสามารถในการลดความเสี่ยง และการบริหารจัดการความเสี่ยงด้านสุขภาพ ซึ่งสอดคล้องกับประเทศไทยที่มีความสำคัญและมีนโยบายในการพัฒนาแรงงานไทยสู่ความมั่นคง มั่งคั่ง ยั่งยืน ตามยุทธศาสตร์ชาติระยะ 20 ปี (ปี พ.ศ. 2560 - 2579) และจากแผนยุทธศาสตร์แห่งชาติ กลุ่มสตรีและเด็กปฐมวัย กลุ่มวัยเรียน กลุ่มวัยรุ่น กลุ่มวัยทำงาน และกลุ่มวัยผู้สูงอายุเป็นกลุ่มที่กระทรวงสาธารณสุขให้ความสำคัญซึ่งมีความเชื่อมโยงกับยุทธศาสตร์ชาติประเด็นที่ 13 การสร้างสภาพแวดล้อมที่เอื้อต่อการมีสุขภาพที่ดี เพื่อให้บรรลุเป้าหมาย “การสร้างเสริมให้คนไทยมีสุขภาพที่ดี” ซึ่งเป็นกำลังสำคัญในการพัฒนาประเทศชาติ โดยเฉพาะอย่างยิ่งกลุ่มวัยทำงานหรือวัยแรงงาน จากข้อมูลของสำนักงานสถิติแห่งชาติรายงานในปีพ.ศ. 2564 ประชากรในประเทศไทยมีงานทำ 37,751,297 คน ทำงานในพื้นที่ภาคตะวันออก จำนวน 3,362,833 คน [1] และเนื่องจากเศรษฐกิจโลกปี 2565-2567

1. บทนำ

เป้าหมายการพัฒนาที่ยั่งยืน (Sustainable development goals (SDGs) มีความสำคัญกับการสร้างหลักประกันการมีสุขภาพที่ดีและส่งเสริมความเป็นอยู่ที่ดี สำหรับทุกคนในช่วงวัย ซึ่งมีเป้าหมายครอบคลุมในหลายประเด็นด้านสุขภาพและความเป็นอยู่ที่ดี โดยมีนโยบายการสร้างและรักษากำลังคนด้านสุขภาพและเสริมขีดความสามารถในการลดความเสี่ยงและการบริหารจัดการความเสี่ยงด้านสุขภาพ ซึ่งสอดคล้องกับประเทศไทยที่มีความสำคัญและมีนโยบายในการพัฒนาแรงงานไทยสู่ความมั่นคง ยั่งยืนตามยุทธศาสตร์ชาาระยะ 20 ปี (ปี พ.ศ. 2560 - 2579) และจากแผนยุทธศาสตร์แห่งชาติ กลุ่มสตรีและเด็กปฐมวัย กลุ่มวัยเรียน กลุ่มวัยรุ่น กลุ่มวัยทำงาน และกลุ่มวัยสุขภาพวัยมีกลุ่มที่กระทรวงสาธารณสุขให้ความสำคัญซึ่งมีความเชื่อมโยงกับยุทธศาสตร์ชาติประเด็นที่ 13 การสร้างสภาพแวดล้อมที่เอื้อต่อการมีสุขภาพที่ดีเพื่อให้บรรลุเป้าหมาย “การสร้างเสริมให้คนไทยมีสุขภาพที่ดี” ซึ่งเป็นกำลังสำคัญในการพัฒนาประเทศชาติ โดยเฉพาะอย่างยิ่งกลุ่มวัยทำงานหรือวัยแรงงาน จากข้อมูลของสำนักงานสถิติแห่งชาติรายงานในปีพ.ศ. 2564 ประชากรในประเทศไทยมีงานทำ 37,751,297 คน ทำงานในพื้นที่ภาคตะวันออก จำนวน 3,362,833 คน [1] และเมื่อจากเศรษฐกิจโลกปี 2565-2567

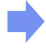

한국영화를 꽃피워낸 한국영화산업의 심장 그 새로운 박동

인터뷰 진행: 정리 <영화부산> 편집팀

전 세계가 주목하는 한국영화와 한국 영화문화의 중심에는 영화진흥위원회가 있다. 2023년은 영화진흥위원회의 창립 50주년, 한국영화아카데미의 개교 40주년 그리고 기관의 부산 이전 10주년을 맞이한 뜻깊은 한 해다. 그리고 한국영화산업은 막 내린 팬데믹과 접어든 엔데믹 시대의 기로에서 격동의 대전환기를 겪는 중이기도 하다. 지난 반세기를 뒤로하고 새로운 영화의 사명을 맞이하기 위해 앞장서고 있는 영화진흥위원회의 박기용 위원장을 만나 한국영화산업의 어제와 오늘, 그리고 내일의 이야기를 들었다.

한국영화를 꽃피워낸 한국영화산업의 심장 그 새로운 박동

인터뷰 진행: 정리 <영화부산> 편집팀

전 세계가 주목하는 한국영화와 한국 영화문화의 중심에는 영화진흥위원회가 있다. 2023년은 영화진흥위원회의 창립 50주년 한국영화아카데미의 개교 40주년 그리고 기관의 부산 이전 10주년을 맞이한 뜻깊은 한 해다. 그리고 한국영화산업은 막 내린 팬데믹과 접어든 엔데믹 시대의 기로에서 격동의 대전환기를 겪는 중이기도 하다. 지난 반세기를 뒤로하고 새로운 영화의 시대를 맞이하기 위해 앞장서고 있는 영화진흥위원회의 박기용 위원장을 만나 한국영화산업의 어제와 오늘, 그리고 내일의 이야기를 들었다.

영화진흥위원회에 대한 간략한 소개를 부탁드립니다

올해로 창립 50주년을 맞이한 영화진흥위원회(이하 영진위)는 한마디로 말씀드리면 한국영화를 책임지는 정부 기관이다. 저는 K-콘텐츠와 K-컬처를 K-무비가 선도하고 있다고 생각하는데 영진위는 그런 K-무비의 본산이라고 말씀드릴 수 있다.

을 삼반기 영진위 창립 50주년을 기념하며 국민이 선정한 영진위와 한국영화 뉴스 Top10을 조사해 공개했다. 개인적으로 꼽는 영진위 최고 뉴스와 한국영화 최고 뉴스는 무엇인가.

먼저 영진위 최고 뉴스는 1973년 영화진흥공사 창립을 꼽겠다. 73년이면 한국영화가 얼시 어려울 때였다. 군사독재 시대이자 영화산업 자체가 정부에서 허가된 20개의 영화사만이 수입, 제작, 배급을 할 수 있는 시기였다. 허가 역시도 매년 정부의 재허가를 받아야 했기에 제작은 철저하게 국책영화 중심이었고, 수입과 배급은 돈벌이 수단에 그쳤다. 그런 상황 속에서 영화인들이 '이런 식'이면 한국영화는 진짜 죽는다'라는 위기의식을 가지고 한국영화를 진흥할 수 있는 기구 설립이 필요하다고 해서 만들어진 것이 영화진흥공사다.

영화진흥위원회 박기용 위원장

영화진흥위원회에 대한 간략한 소개를 부탁드립니다.

올해로 창립 50주년을 맞이한 영화진흥위원회(이하 영진위)는 한마디로 말씀드리면 한국영화를 책임지는 정부 기관이다. 저는 K-콘텐츠와 K-컬처를 K-무비가 선도하고 있다고 생각하는데 영진위는 그런 K-무비의 본산이라고 말씀드릴 수 있다.

을 삼반기 영진위 창립 50주년을 기념하며 국민이 선정한 영진위와 한국영화 뉴스 Top10을 조사해 공개했다. 개인적으로 꼽는 영진위 최고 뉴스와 한국영화 최고 뉴스는 무엇인가.

먼저 영진위 최고 뉴스는 1973년 영화진흥공사 창립을 꼽겠다. 73년이면 한국영화가 얼시 어려울 때였다. 군사독재 시대이자 영화산업 자체가 정부에서 허가된 20개의 영화사만이 수입, 제작, 배급을 할 수 있는 시기였다. 허가 역시도 매년 정부의 재허가를 받아야 했기에 제작은 철저하게 국책영화 중심이었고, 수입과 배급은 돈벌이 수단에 그쳤다. 그런 상황 속에서 영화인들이 '이런 식'이면 한국영화는 진짜 죽는다'라는 위기의식을 가지고 한국영화를 진흥할 수 있는 기구 설립이 필요하다고 해서 만들어진 것이 영화진흥공사다.

Figure S19. The markdown output for Thai and Korean documents.

## V.6.2. Handwriting Text Recognition

### Mixed Printed and Handwritten Text

看法四：人工智能只是“辅助”学生学习，无法让他们获得自主学习能力。现在对人工智能的使用，并没有“傻瓜”到学生输入一个问题，就能立刻写出一篇完美论文的程度。（节选自《中国青年报》，有删改）

材料四  
ChatGPT的问世是社会发展的必然，是人们需求的结果呈现。新事物带来新挑战，同时也带来新机遇。有人看到变化带来的问题和未知的变数，有人看到了问题背后的机遇。只看到问题看不到机遇的人，可能会开始不停抱怨，进而错过了这个时代的宝贵机会。其实，这是因内心定力不足，所以容易被变化左右。

《孟子》中有句话说：“虽有智慧，不如乘势”。我们心中有这样一份定力在。当面对新的变化的时候，我们每一个从业者都可以升级自己的认知，打开我们生存的空间，借助外力，顺势而上！

面对ChatGPT等新兴智能科技，我们不应该固步自封，而应该正确认识它们给生活带来了怎样的便利，引发了怎样的革命。我们一路走来，本就是站在一次又一次的革命更迭的洪流中，重塑自己的思维，进而重塑时代的面貌。（节选自“知乎”）

1. 下列对以上材料内容的理解和分析，正确的一项是（D）（3分）  
A. ChatGPT 基于深度学习算法，通过简单的指令可实现对用户指令的简化、分解和消歧。  
B. ChatGPT 能够与人聊天、完成 AI 绘画，但只能通过一些被认为是入门级的专业测试。  
C. ChatGPT 较以往人工智能机器人而言，功能更强大，但网友的热议都是负面评价。  
D. ChatGPT 问世是社会发展的必然，是人们需求的结果呈现，同时也给人类带来新机遇。

2. 目前，全球多国大学、科研机构发布明确的人工智能禁令，多家期刊、出版机构禁止将ChatGPT列为论文合著者。请结合材料三分析出现这些禁令的原因有哪些。（5分）  
人工智能的快速发展具有局限性，无法培养学生的独立思考能力与解决问题的能力，无法让学生获得自主学习动力。

3. 【口语交际】班级就“如何看待ChatGPT”这一话题展开讨论，请你结合上述材料，围绕话题准备发言稿，100字左右。（4分）（高阶思维）  
同学们，网络是一把双刃剑。它是科技发展产物，它丰富了我们的日常生活，同时也带来一些弊端。不过，如果我们能正确使用它，就可以让它更好地帮助我们学习与生活，为我们的生活带来更多便利。

三、名著阅读  
1. 读完《红星照耀中国》后，学校要为活动制作以“长征”为主题的文化墙，一共分3个板块，小文将仿照一、三板块的标题，为第二板块命名。（2分）  
第一板块：新起点——瑞金 第二板块：转折点——遵义 第三板块：里程碑——会宁  
2. 班上打算召开《红星照耀中国》读书交流会，同学们就“当代青少年如何传承长征精神”这一话题展开讨论，请说说你的看法。（4分）（高阶思维）  
红军长征中，翻雪山、过草地，冰天雪地，毫不退缩，革命理想高于天。在当代时代，我们要坚定理想信念，不怕困难，勇于拼搏，为实现中华民族伟大复兴而奋斗。

看法四：人工智能只是“辅助”学生学习，无法让他们获得自主学习能力。现在对人工智能的使用，并没有“傻瓜”到学生输入一个问题，就能立刻写出一篇完美论文的程度。（节选自《中国青年报》，有删改）

材料四

ChatGPT的问世是社会发展的必然，是人们需求的结果呈现。新事物带来新挑战，同时也带来新机遇。有人看到变化带来的问题和未知的变数，有人看到了问题背后的机遇。只看到问题看不到机遇的人，可能会开始不停抱怨，进而错过了这个时代的宝贵机会。其实，这是因内心定力不足，所以容易被变化左右。

《孟子》中有句话说：“虽有智慧，不如乘势”。我们心中有这样一份定力在。当面对新的变化的时候，我们每一个从业者都可以升级自己的认知，打开我们生存的空间，借助外力，顺势而上！

面对ChatGPT等新兴智能科技，我们不应该固步自封，而应该正确认识它们给生活带来了怎样的便利，引发了怎样的革命。我们一路走来，本就是站在一次又一次的革命更迭的洪流中，重塑自己的思维，进而重塑时代的面貌。

1. 下列对以上材料内容的理解和分析，正确的一项是（D）（3分）

- A. ChatGPT 基于深度学习算法，通过简单的指令可实现对用户指令的简化、分解和消歧。
- B. ChatGPT 能够与人聊天、完成 AI 绘画，但只能通过一些被认为是入门级的专业测试。
- C. ChatGPT 较以往人工智能机器人而言，功能更强大，但网友的热议都是负面评价。
- D. ChatGPT 问世是社会发展的必然，是人们需求的结果呈现，同时也给人类带来新机遇。

2. 目前，全球多国大学、科研机构发布明确的人工智能禁令，多家期刊、出版机构禁止将ChatGPT列为论文合著者。请结合材料三分析出现这些禁令的原因有哪些。（5分）

人工智能的快速发展具有局限性，无法培养学生的独立思考能力与解决问题的能力无法让学生获得自主学习动力

3. 【口语交际】班级就“如何看待ChatGPT”这一话题展开讨论，请你结合上述材料，围绕话题准备发言稿，100字左右。（4分）（高阶思维）

同学们，网络是一把双刃剑。它是科技发展的产物，它丰富了我们的日常生活，同时也带来一些弊端。不过，如果我们能正确使用它，就可以让它更好地帮助我们学习与生活，为我们的生活带来更多便利。

### 三、名著阅读

1. 读完《红星照耀中国》后，学校要为活动制作以“长征”为主题的文化墙，一共分3个板块，小文将仿照一、三板块的标题，为第二板块命名。（2分）

第一板块：新起点——瑞金 第二板块：转折点——遵义 第三板块：里程碑——会宁

2. 班上打算召开《红星照耀中国》读书交流会，同学们就“当代青少年如何传承长征精神”这一话题展开讨论，请说说你的看法。（4分）（高阶思维）

红军长征中，翻雪山、过草地，冰天雪地，毫不退缩，革命理想高于天。在当代时代，我们要坚定理想信念，不怕困难，勇于拼搏，为实现中华民族伟大复兴而奋斗。

### Handwritten Formula

$$\sin(\alpha \pm \beta) = \sin \alpha \cos \beta \pm \cos \alpha \sin \beta$$

$$\cos(\alpha \pm \beta) = \cos \alpha \cos \beta \mp \sin \alpha \sin \beta$$

$$\tan(\alpha \pm \beta) = \frac{\tan \alpha \pm \tan \beta}{1 \mp \tan \alpha \tan \beta}$$


$$\sin 2\alpha = 2 \sin \alpha \cos \alpha$$

$$\cos 2\alpha = \cos^2 \alpha - \sin^2 \alpha = 1 - 2 \sin^2 \alpha = 2 \cos^2 \alpha - 1$$

$$\sin^2 \alpha = \frac{1 - \cos 2\alpha}{2} \quad \cos^2 \alpha = \frac{1 + \cos 2\alpha}{2}$$

$$a \sin \alpha + b \cos \alpha = \sqrt{a^2 + b^2} \sin(\alpha + \theta) \text{ 其中 } \tan \theta = \frac{b}{a}$$

$$\sin 2\alpha = \frac{2 \tan \alpha}{1 + \tan^2 \alpha} \quad \cos 2\alpha = \frac{1 - \tan^2 \alpha}{1 + \tan^2 \alpha}$$

$$\tan 2\alpha = \frac{2 \tan \alpha}{1 - \tan^2 \alpha}$$

$$\sin(\alpha \pm \beta) = \sin \alpha \cos \beta \pm \cos \alpha \sin \beta$$

$$\cos(\alpha \pm \beta) = \cos \alpha \cos \beta \mp \sin \alpha \sin \beta$$

$$\tan(\alpha \pm \beta) = \frac{\tan \alpha \pm \tan \beta}{1 \mp \tan \alpha \tan \beta}$$


$$\sin 2\alpha = 2 \sin \alpha \cos \alpha$$

$$\cos 2\alpha = \cos^2 \alpha - \sin^2 \alpha = 1 - 2 \sin^2 \alpha = 2 \cos^2 \alpha - 1$$

$$\sin^2 \alpha = \frac{1 - \cos 2\alpha}{2} \quad \cos^2 \alpha = \frac{1 + \cos 2\alpha}{2}$$

$$a \sin \alpha + b \cos \alpha = \sqrt{a^2 + b^2} \sin(\alpha + \theta) \text{ 其中 } \tan \theta = \frac{b}{a}$$

$$\sin 2\alpha = \frac{2 \tan \alpha}{1 + \tan^2 \alpha} \quad \cos 2\alpha = \frac{1 - \tan^2 \alpha}{1 + \tan^2 \alpha}$$

$$\tan 2\alpha = \frac{2 \tan \alpha}{1 - \tan^2 \alpha}$$

Figure S20. The markdown output for Mixed Printed Handwritten Text and Handwritten Formula documents.

### Handwriting Chinese

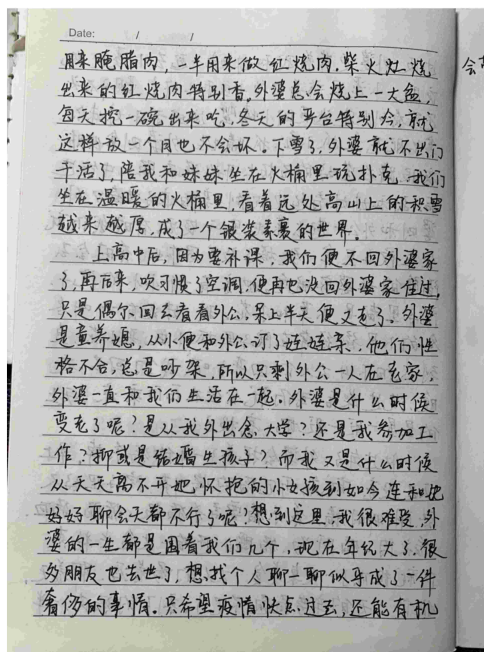

用来腌腊肉，一半用来做红烧肉。柴火灶烧出来的红烧肉特别香。外婆总会烧上一大盆，每天挖一碗出来吃，冬天的严台特别冷，就这样放一个月也不会坏。下雪了，外婆就不出门干活了，陪我和妹妹坐在火桶里玩扑克。我们坐在温暖的火桶里，看着远处高山上的积雪越来越厚，成了一个银装素裹的世界。

上高中后，因为要补课，我们便不回外婆家了，再后来，吹习惯了空调，便再也没回外婆家住过。只是偶尔回去看看外公，呆上半年便又走了。外婆是童养媳，从小便和外公订了娃娃亲，他们性格不合，总是吵架，所以只剩外公一人在老家，外婆一直和我们生活在一起。外婆是什么时候变老了呢？是我外出念大学？还是我参加工作？抑或是结婚生孩子？而我又是什么时候从天天离不开她怀抱的小女孩到如今连和她好好聊会天都不行了呢？想到这里，我很难受，外婆的一生都是围着我们几个，现在年纪大了，很多朋友也去世了，想找个人聊一聊似乎成了一件奢侈的事情。只希望疫情快点过去，还能有机

### Handwriting English

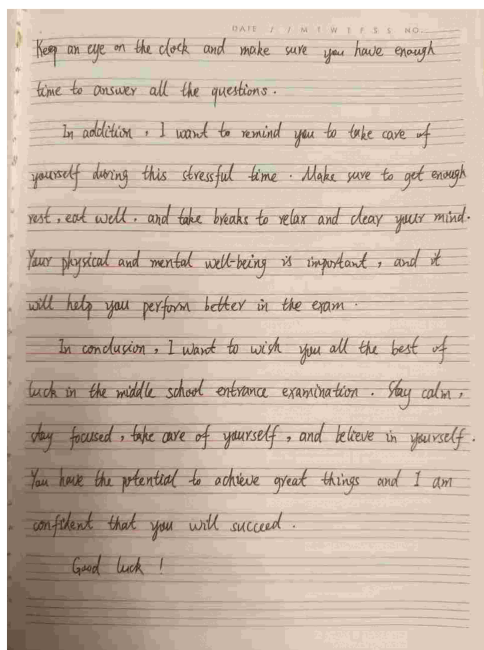

Keep an eye on the clock and make sure you have enough time to answer all the questions.

In addition, I want to remind you to take care of yourself during this stressful time. Make sure to get enough rest, eat well, and take breaks to relax and clear your mind. Your physical and mental well-being is important, and it will help you perform better in the exam.

In conclusion, I want to wish you all the best of luck in the middle school entrance examination. Stay calm, stay focused, take care of yourself, and believe in yourself. You have the potential to achieve great things and I am confident that you will succeed.

Good luck!

Figure S21. The markdown output for Handwriting Chinese and Handwriting English documents.

### V.6.3. Vertical Text Recognition

#### Vertical Chinese Typesetting



**龙**  
Chinese Loong

祥瑞四灵之一。

龙，中国古代传说中的鳞虫之长，能兴云雨致万物，是善于变化的神兽。中国人自称「龙的传人」，龙是中国最重要的文化图腾之一，亦是中华民族精神的象征。

中国古代最早的辞典《尔雅》这样描述龙：“九似者，角似鹿，头似驼，眼似鬼，项似蛇，腹似鹿，鳞似鱼，爪似鹰，掌似虎，耳似牛。”龙的基本形态是蛇，也是多种动物和自然天象的开放集合。在先民的想象中，龙能显能隐、能细能巨、能短能长，更能呼风唤雨，具有超凡的威力。龙在历史中还衍生出很多种类，“有鳞曰蛟龙，有翼曰应龙，有角曰虬龙，无角曰螭龙”。又有“龙生九子”的说法，龙的九个儿子在人间各司其职。几千年来，封建帝王把龙当作权力和尊严的象征。皇帝被称为“真龙天子”，凡与皇帝有关的事物皆冠以“龙”字，如：“龙颜”、“龙袍”、“龙种”等。在民间，龙代表着智慧，是贤德人才的象征。相传孔子见到老子后，认为老子是“人中之龙”。诸葛亮出山之前躬耕陇亩，自称“卧龙先生”。现在，人们也常用“望子成龙”表示希望子孙出人头地。同时，龙代表着吉庆、祥和，寓意施惠于民，风调雨顺，是祥瑞之兆。人们以赛龙舟、点龙灯的方式祈福幸福的生活。

#### Vertical Japanese Calligraphy



夕風の中 日暮だけ 通り過ぎて 中人パツと光つて 咲いた。 釜火を見てた。 きっとまだ 終わらない夏が。 曖昧な心を 解かして 曇いだ。 この夜が続いて 欲しかった。 東誠鎖

夕風の中 日暮だけが 通り過ぎて 中人パツと光つて 咲いた。 釜火を見てた。 きっとまだ 終わらない夏が。 曖昧な心を 解かして 曇いだ。 この夜が続いて 欲しかった。 東誠鎖

↓

**龙**  
Chinese Loong

祥瑞四灵之一。

龙，中国古代传说中的鳞虫之长，能兴云雨致万物，是善于变化的神兽。中国人自称「龙的传人」，龙是中国最重要的文化图腾之一，亦是中华民族精神的象征。

中国古代最早的辞典《尔雅》这样描述龙：“九似者，角似鹿，头似驼，眼似鬼，项似蛇，腹似鹿，鳞似鱼，爪似鹰，掌似虎，耳似牛。”龙的基本形态是蛇，也是多种动物和自然天象的开放集合。在先民的想象中，龙能显能隐、能细能巨、能短能长，更能呼风唤雨，具有超凡的威力。龙在历史中还衍生出很多种类，“有鳞曰蛟龙，有翼曰应龙，有角曰虬龙，无角曰螭龙”。又有“龙生九子”的说法，龙的九个儿子在人间各司其职。几千年来，封建帝王把龙当作权力和尊严的象征。皇帝被称为“真龙天子”，凡与皇帝有关的事物皆冠以“龙”字，如：“龙颜”、“龙袍”、“龙种”等。在民间，龙代表着智慧，是贤德人才的象征。相传孔子见到老子后，认为老子是“人中之龙”。诸葛亮出山之前躬耕陇亩，自称“卧龙先生”。现在，人们也常用“望子成龙”表示希望子孙出人头地。同时，龙代表着吉庆、祥和，寓意施惠于民，风调雨顺，是祥瑞之兆。人们以赛龙舟、点龙灯的方式祈福幸福的生活。

↓

夕風の中 日暮だけが 通り過ぎて 中人パツと光つて 咲いた。 釜火を見てた。 きっとまだ 終わらない夏が。 曖昧な心を 解かして 曇いだ。 この夜が続いて 欲しかった。 東誠鎖

#### Vertical Chinese Calligraphy



觀自在菩薩行深般若波羅蜜多時照見五蘊皆空度一切苦厄舍利子色不異空空不異色即是空空即是色受想行識亦復如是舍利子是諸法空相不生不滅不垢不淨不增不減無色無聲香味觸

#### Ancient Chinese Scrolls



按天機金篆玉函經乃九天玄女授青鳥子之秘文吉凶禍福百發百中惜古聖通而人不古若雖有是書恐難辨成諒宿度分宮多秘不傳以故註釋不明龍穴宿度不清關煞不真天度與分金不相貫串以致發用無應禍福不准余深病之備訪明師且行且學願得要領從洪武二十三年至二十五年曾三編訂矣因遇張宗道會問而測地宿度之盈縮及各宮分度界限之起止始有著落用之禍福不備應如符鼓緣羅經有三盤內層地盤十二支統六十龍七十

Figure S22. The markdown output for various types of vertical documents.

## V.7. Table Recognition

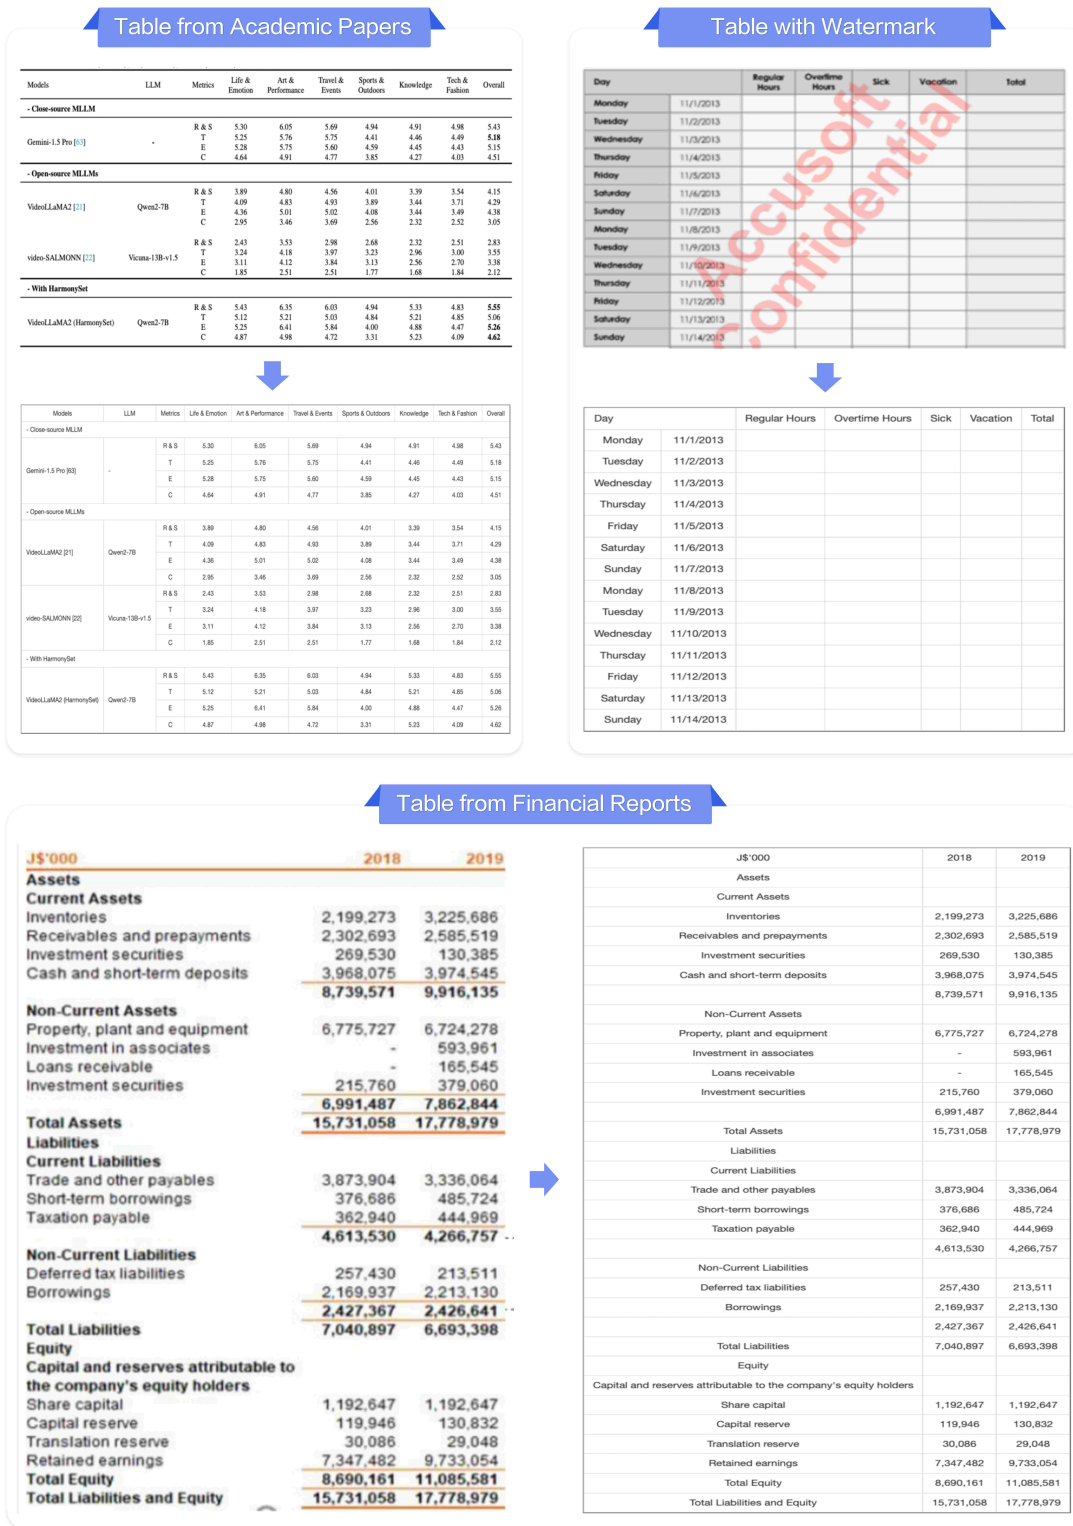

Figure S23. The markdown output for various types of Tables.

Table with Image

|                                      |                |                                                                                   |
|--------------------------------------|----------------|-----------------------------------------------------------------------------------|
| 双臂水平外伸，掌心朝上，向上招手，双臂移动速度表示上升率大小       | 向上移动<br>(上升高度) |  |
| 双臂水平外伸，掌心朝下，向下招手，双臂移动速度表示上升率大小       | 向下移动<br>(下降高度) |  |
| 一臂水平指向右侧，另一臂反复向所指方向挥动，示意直升机应向左移动(转向) | 向左移动<br>(转向)   |  |
| 一臂水平指向左侧，另一臂反复向所指方向挥动，示意直升机应向右移动(转向) | 向右移动<br>(转向)   |  |

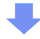

|                                      |            |                                                                                     |
|--------------------------------------|------------|-------------------------------------------------------------------------------------|
| 双臂水平外伸，掌心朝上，向上招手，双臂移动速度表示上升率大小       | 向上移动(上升高度) |   |
| 双臂水平外伸，掌心朝下，向下招手，双臂移动速度表示上升率大小       | 向下移动(下降高度) |  |
| 一臂水平指向右侧，另一臂反复向所指方向挥动，示意直升机应向左移动(转向) | 向左移动(转向)   |  |
| 一臂水平指向左侧，另一臂反复向所指方向挥动，示意直升机应向右移动(转向) | 向右移动(转向)   |  |

Table with Formula

|      |                                                               |
|------|---------------------------------------------------------------|
| 电流   | $I = \frac{q}{t}$                                             |
| 电阻串联 | $R = R_1 + R_2 + R_3$                                         |
| 电阻并联 | $\frac{1}{R} = \frac{1}{R_1} + \frac{1}{R_2} + \frac{1}{R_3}$ |
| 电池串联 | $E = nE, r_{\text{总}} = nr$                                   |
| 电池并联 | $E_{\text{总}} = E, r_{\text{总}} = r/n$                        |
| 欧姆定律 | $U = E - Ir$                                                  |
|      | $I = \frac{E}{R+r}$ 或 $I = \frac{U}{R}$                       |
| 电阻定律 | $R = \rho \frac{L}{S}$ 或电阻率 $\rho = \frac{RS}{L}$             |
| 电功   | $W = UIt$                                                     |
| 电热   | $Q = I^2 R t$                                                 |
| 功率   | $P = UI, P_R = I^2 R$                                         |

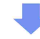

|      |                                                               |
|------|---------------------------------------------------------------|
| 电流   | $I = \frac{q}{t}$                                             |
| 电阻串联 | $R = R_1 + R_2 + R_3$                                         |
| 电阻并联 | $\frac{1}{R} = \frac{1}{R_1} + \frac{1}{R_2} + \frac{1}{R_3}$ |
| 电池串联 | $E = nE, r_{\text{总}} = nr$                                   |
| 电池并联 | $E_{\text{总}} = E, r_{\text{总}} = r/n$                        |
| 欧姆定律 | $U = E - Ir$                                                  |
|      | $I = \frac{E}{R+r}$ 或 $I = \frac{U}{R}$                       |
| 电阻定律 | $R = \rho \frac{L}{S}$ 或电阻率 $\rho = \frac{RS}{L}$             |
| 电功   | $W = UIt$                                                     |
| 电热   | $Q = I^2 R t$                                                 |
| 功率   | $P = UI, P_R = I^2 R$                                         |

Photo Table

| 序号 | 深度/cm | 橡皮膜朝向 | 压强计左右液面高度差/cm |
|----|-------|-------|---------------|
| 1  | 5     | 朝上    | 4.9           |
| 2  | 5     | 朝下    | 4.9           |
| 3  | 5     | 朝侧面   | 4.9           |
| 4  | 10    | 朝侧面   | 9.7           |
| 5  | 15    | 朝侧面   | 14.6          |

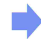

| 序号 | 深度/cm | 橡皮膜朝向 | 压强计左右液面高度差/cm |
|----|-------|-------|---------------|
| 1  | 5     | 朝上    | 4.9           |
| 2  | 5     | 朝下    | 4.9           |
| 3  | 5     | 朝侧面   | 4.9           |
| 4  | 10    | 朝侧面   | 9.7           |
| 5  | 15    | 朝侧面   | 14.6          |

Figure S24. The markdown output for various types of Tables.

## V.8. Formula Recognition

### Complex Printed Expressions

$$\begin{aligned} & \frac{6f''(x_2)(\nu(\lambda_1^2 - 1 + \theta^2 f(x_2)^2) + f'(x_2)^2 - 1)}{f'(x_2)} - \frac{6\theta^2 f(x_2)(\lambda_1^2 - 1 + \theta^2 f(x_2)^2 + \nu(f'(x_2)^2 - 1))}{f'(x_2)} \\ & + \dots + \frac{4H^2 \lambda_1^2 \theta^2 (1 - \nu) f'(x_2) f''(x_2)}{\lambda_1^2 + \theta^2 f(x_2)^2} - \frac{H^2 \lambda_1^2 \theta^4 (1 - \nu) f(x_2) f'(x_2) (\lambda_1^2 + \theta^2 f(x_2)^2 + f'(x_2)^2)}{(\lambda_1^2 + \theta^2 f(x_2)^2)^2} \\ & + \dots + 12f'(x_2)(\theta^2 \nu f(x_2) + f''(x_2)) = 0. \end{aligned}$$

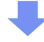

$$\begin{aligned} & \frac{6f''(x_2)(\nu(\lambda_1^2 - 1 + \theta^2 f(x_2)^2) + f'(x_2)^2 - 1)}{f'(x_2)} - \frac{6\theta^2 f(x_2)(\lambda_1^2 - 1 + \theta^2 f(x_2)^2 + \nu(f'(x_2)^2 - 1))}{f'(x_2)} \\ & + \dots + \frac{4H^2 \lambda_1^2 \theta^2 (1 - \nu) f'(x_2) f''(x_2)}{\lambda_1^2 + \theta^2 f(x_2)^2} - \frac{H^2 \lambda_1^2 \theta^4 (1 - \nu) f(x_2) f'(x_2) (\lambda_1^2 + \theta^2 f(x_2)^2 + f'(x_2)^2)}{(\lambda_1^2 + \theta^2 f(x_2)^2)^2} \\ & + \dots + 12f'(x_2)(\theta^2 \nu f(x_2) + f''(x_2)) = 0. \end{aligned}$$

### Handwritten Expressions

$$\therefore f[g(x)] = \begin{cases} 1, & |x| \in [0, 1) \cup [2, +\infty) \\ 0, & |x| \in [1, 2) \end{cases}$$

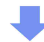

$$\therefore f[g(x)] = \begin{cases} 1, & |x| \in [0, 1) \cup [2, +\infty) \\ 0, & |x| \in [1, 2) \end{cases}$$

### Screen-Captured Expressions

$$\begin{aligned} f(x) &= 2x^2 + 2x + 3, \\ f(3) &= 2 \cdot 3^2 + 2 \cdot 3 + 3 = 27, \\ f(a) &= 2a^2 + 2a + 3, \\ f(0) &= 0 + 0 + 3 = 3, \text{ etc.} \end{aligned}$$

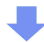

$$\begin{aligned} f(x) &= 2x^2 + 2x + 3, \\ f(3) &= 2 \cdot 3^2 + 2 \cdot 3 + 3 = 27, \\ f(a) &= 2a^2 + 2a + 3, \\ f(0) &= 0 + 0 + 3 = 3, \text{ etc.} \end{aligned}$$

### Vertical Formula

$$\begin{array}{r} 123 \\ 3 \overline{)370} \\ \underline{3} \phantom{0} \\ 7 \phantom{0} \\ \underline{6} \phantom{0} \\ 10 \phantom{0} \\ \underline{9} \phantom{0} \\ 1 \phantom{0} \end{array} \quad \rightarrow \quad \begin{array}{r} 123 \\ 3 \overline{)370} \\ \underline{3} \phantom{0} \\ 7 \phantom{0} \\ \underline{6} \phantom{0} \\ 10 \phantom{0} \\ \underline{9} \phantom{0} \\ 1 \phantom{0} \end{array} \quad \begin{array}{r} 853 \\ \times 95 \\ \hline 4265 \\ 7677 \\ \hline 81035 \end{array}$$

Figure S25. The markdown output for various types of Formulas.

### Complex Printed Expressions

$$\begin{aligned}
 A &= 4 \iint_D \sqrt{1 + \left(\frac{\partial z}{\partial x}\right)^2 + \left(\frac{\partial z}{\partial y}\right)^2} dx dy \\
 &= 4 \iint_D \frac{a}{\sqrt{a^2 - x^2 - y^2}} dx dy \xrightarrow{\text{极坐标}} 4a \iint_D \frac{1}{\sqrt{a^2 - \rho^2}} \rho d\rho d\theta \\
 &= 4a \int_0^{\frac{\pi}{2}} d\theta \int_0^{a \cos \theta} \frac{\rho}{\sqrt{a^2 - \rho^2}} d\rho \\
 &= 4a^2 \int_0^{\frac{\pi}{2}} (1 - \sin \theta) d\theta = 2a^2(\pi - 2).
 \end{aligned}$$

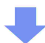

$$\begin{aligned}
 A &= 4 \iint_D \sqrt{1 + \left(\frac{\partial z}{\partial x}\right)^2 + \left(\frac{\partial z}{\partial y}\right)^2} dx dy \\
 &= 4 \iint_D \frac{a}{\sqrt{a^2 - x^2 - y^2}} dx dy \xrightarrow{\text{极坐标}} 4a \iint_D \frac{1}{\sqrt{a^2 - \rho^2}} \rho d\rho d\theta \\
 &= 4a \int_0^{\frac{\pi}{2}} d\theta \int_0^{a \cos \theta} \frac{\rho}{\sqrt{a^2 - \rho^2}} d\rho \\
 &= 4a^2 \int_0^{\frac{\pi}{2}} (1 - \sin \theta) d\theta = 2a^2(\pi - 2).
 \end{aligned}$$

### Screen-Captured Expressions

$$\varphi(\text{MnO}_2/\text{Mn}^{2+}) = \varphi^\ominus(\text{MnO}_2/\text{Mn}^{2+}) + \frac{0.059}{n} \lg \frac{[\text{氧化型}]}{[\text{还原型}]}$$

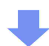

$$\varphi(\text{MnO}_2/\text{Mn}^{2+}) = \varphi^\ominus(\text{MnO}_2/\text{Mn}^{2+}) + \frac{0.059}{n} \lg \frac{[\text{氧化型}]}{[\text{还原型}]}$$

### Handwritten Expressions

$$e^{\frac{1}{x}} + b = 0. \begin{cases} b > 0 & \text{非间断点} \\ b < 0 & \text{为-间断点} \end{cases}$$

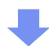

$$e^{\frac{1}{x}} + b = 0. \begin{cases} b > 0 & \text{非间断点} \\ b < 0 & \text{为-间断点} \end{cases}$$

$$S_{\text{总}} = \frac{1}{2} g_{\text{地球}} t_1^2 + v_0 t_2 + \frac{1}{2} a_{\text{空气}} t_2^2$$

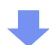

$$S_{\text{总}} = \frac{1}{2} g_{\text{地球}} t_1^2 + v_0 t_2 + \frac{1}{2} a_{\text{空气}} t_2^2$$

Figure S26. The markdown output for various types of Formulas.

## V.9. Chart Recognition

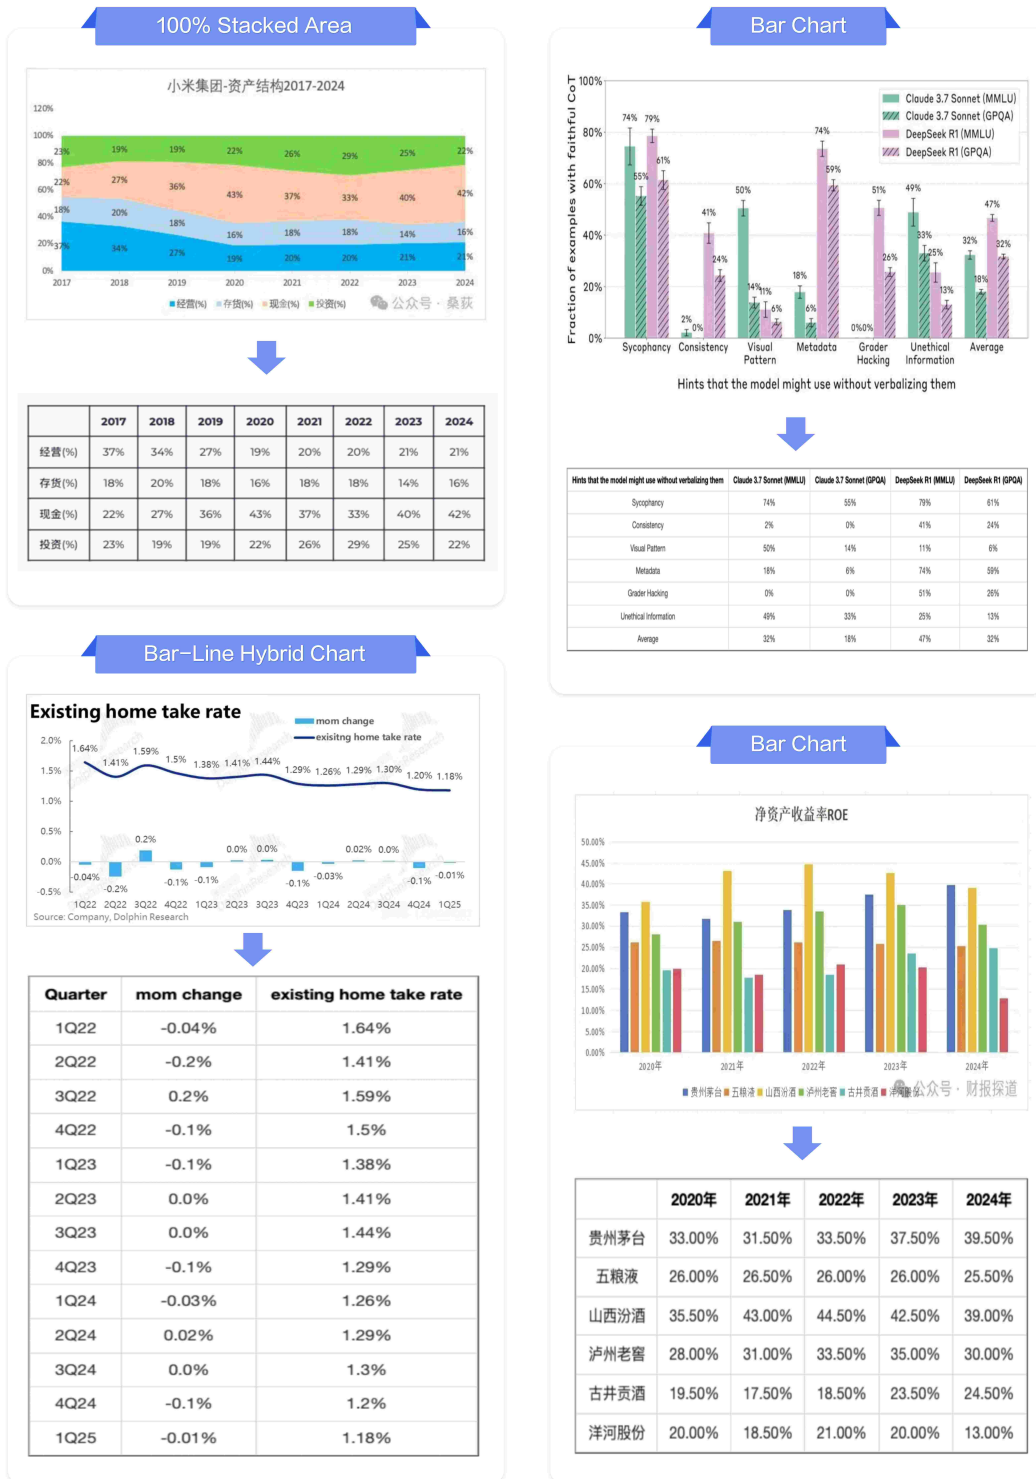

Figure S27. The markdown output for various types of Charts.

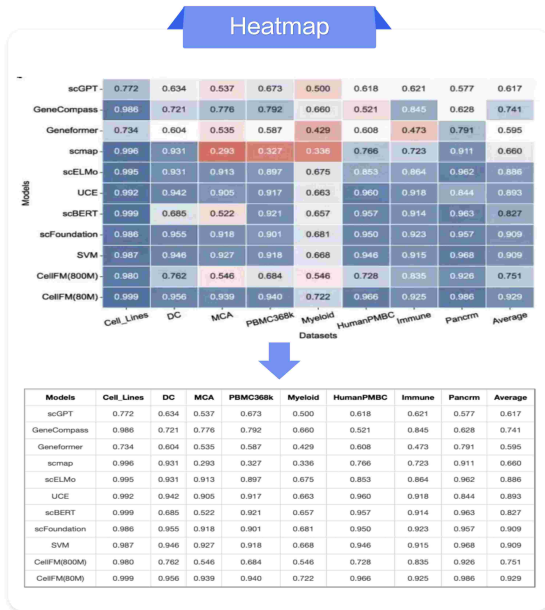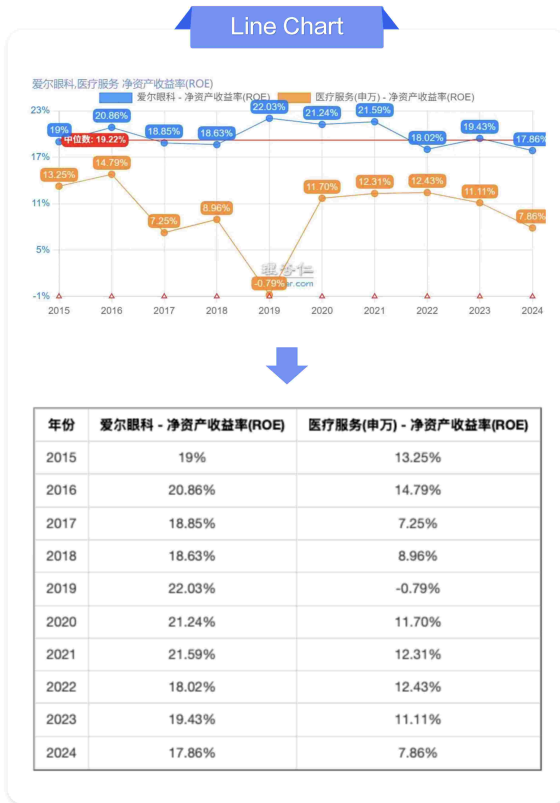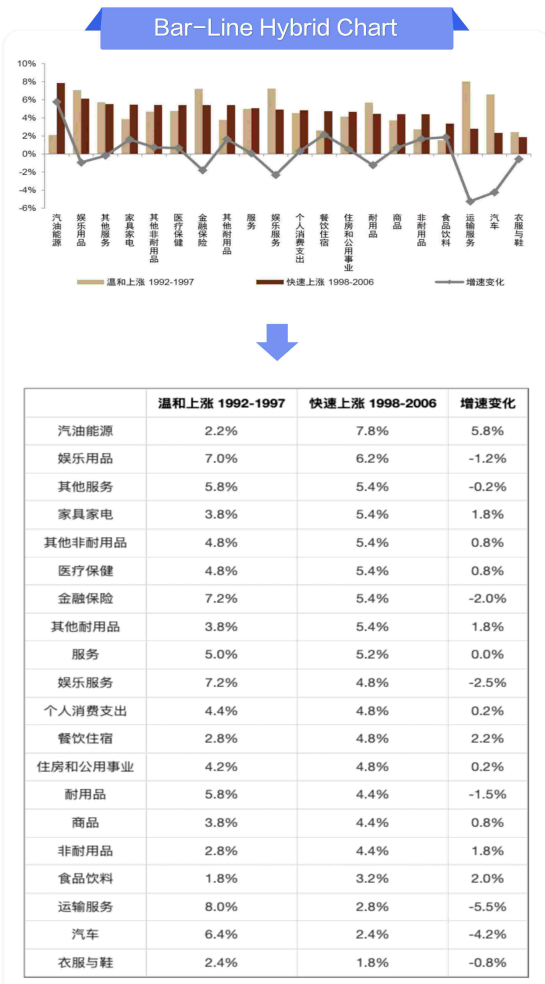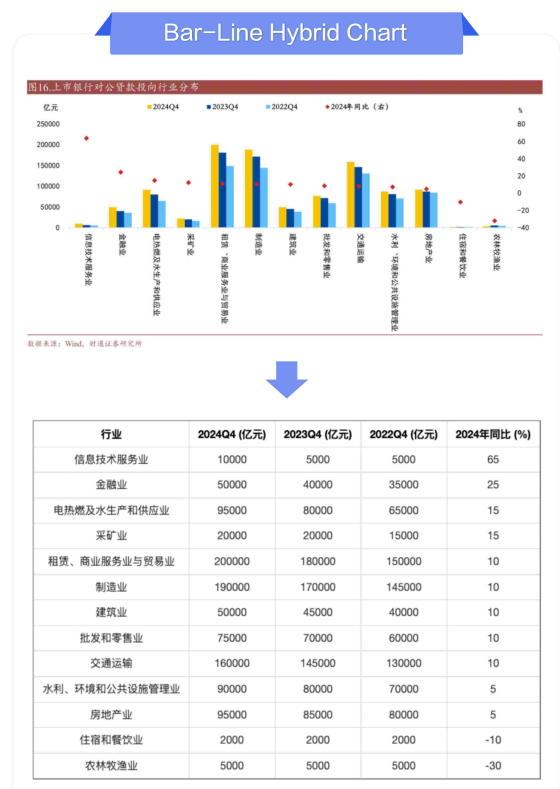

Figure S28. The markdown output for various types of Charts.

100% Stacked Bar Chart

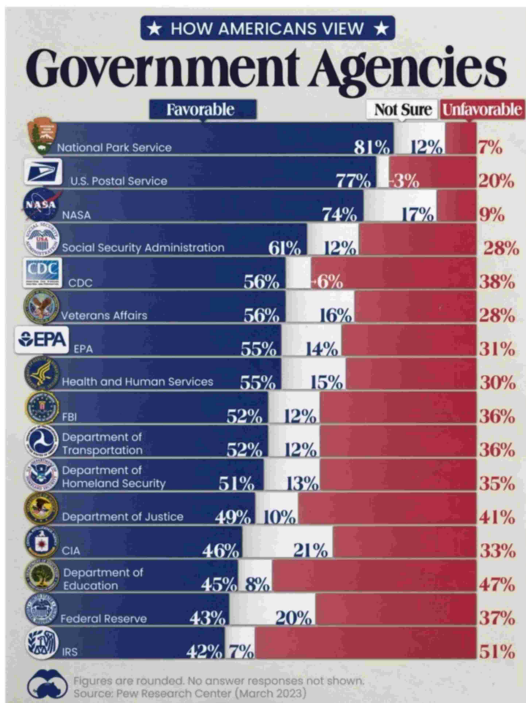

| Agency                          | Favorable | Not Sure | Unfavorable |
|---------------------------------|-----------|----------|-------------|
| National Park Service           | 81%       | 12%      | 7%          |
| U.S. Postal Service             | 77%       | 3%       | 20%         |
| NASA                            | 74%       | 17%      | 9%          |
| Social Security Administration  | 61%       | 12%      | 28%         |
| CDC                             | 56%       | 6%       | 38%         |
| Veterans Affairs                | 56%       | 16%      | 28%         |
| EPA                             | 55%       | 14%      | 31%         |
| Health and Human Services       | 55%       | 15%      | 30%         |
| FBI                             | 52%       | 12%      | 36%         |
| Department of Transportation    | 52%       | 12%      | 36%         |
| Department of Homeland Security | 51%       | 13%      | 35%         |
| Department of Justice           | 49%       | 10%      | 41%         |
| CIA                             | 46%       | 21%      | 33%         |
| Department of Education         | 45%       | 8%       | 47%         |
| Federal Reserve                 | 43%       | 20%      | 37%         |
| IRS                             | 42%       | 7%       | 51%         |

Bar-Line Hybrid Chart

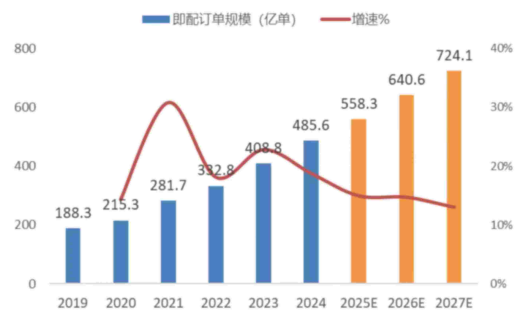

| 年份    | 即配订单规模 (亿单) | 增速%   |
|-------|-------------|-------|
| 2019  | 188.3       |       |
| 2020  | 215.3       | 15.0% |
| 2021  | 281.7       | 31.0% |
| 2022  | 332.8       | 18.0% |
| 2023  | 408.8       | 22.0% |
| 2024  | 485.6       | 18.0% |
| 2025E | 558.3       | 14.0% |
| 2026E | 640.6       | 14.0% |
| 2027E | 724.1       | 12.0% |

Pie Chart

| 类别 | 数值   | 百分比    |
|----|------|--------|
| 住房 | 3600 | 28.13% |
| 食品 | 2400 | 18.75% |
| 服装 | 1800 | 14.06% |
| 交通 | 1500 | 11.72% |
| 教育 | 1200 | 9.37%  |
| 医疗 | 900  | 7.03%  |
| 娱乐 | 800  | 6.25%  |
| 其他 | 600  | 4.69%  |

Line Chart

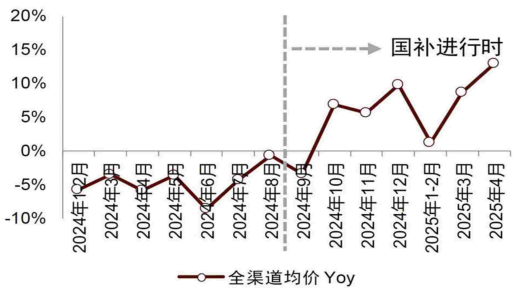

| 月份        | 全渠道均价 YoY |
|-----------|-----------|
| 2024年1-2月 | -5%       |
| 2024年3月   | -4%       |
| 2024年4月   | -5%       |
| 2024年5月   | -4%       |
| 2024年6月   | -8%       |
| 2024年7月   | -5%       |
| 2024年8月   | -1%       |
| 2024年9月   | -3%       |
| 2024年10月  | 7%        |
| 2024年11月  | 6%        |
| 2024年12月  | 10%       |
| 2025年1-2月 | 1%        |
| 2025年3月   | 9%        |
| 2025年4月   | 13%       |

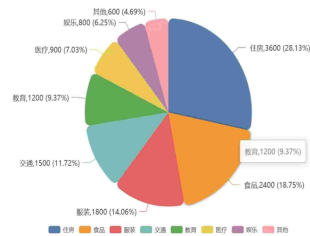

Figure S29. The markdown output for various types of Charts.

# V.10. Layout Detection

Image

财信证券  
CASHWIN SECURITIES

公司研究报告

**财务预测摘要**

| 利润表          | 2018A      | 2018A     | 2020E     | 2021E     | 2022E      | 资产负债表       | 2018A    | 2019A    | 2020E    | 2021E    | 2022E    |
|--------------|------------|-----------|-----------|-----------|------------|-------------|----------|----------|----------|----------|----------|
| 营业收入         | 2369.93    | 3314.08   | 3820.52   | 4591.51   | 6060.34    | 权益类         |          |          |          |          |          |
| 成本/费用        | 1724.68    | 2331.28   | 2721.66   | 3286.93   | 4324.60    | 无利率         | 27.29%   | 29.62%   | 28.76%   | 28.35%   | 27.69%   |
| 营业利润         | 1977.70    | 3146.31   | 3407.96   | 4040.36   | 5333.53    | 公允价值        | 8.50%    | 8.70%    | 8.41%    | 8.20%    | 7.70%    |
| 管理费用         | 915.83     | 1324.66   | 1505.31   | 1767.74   | 2321.20    | EBITDA/营业收入 | 11.96%   | 14.07%   | 24.32%   | 22.29%   | 19.29%   |
| 营业费用         | 866.96     | 1291.71   | 1459.46   | 1712.64   | 2133.41    | EBITDA/营业利润 | 14.33%   | 14.40%   | 24.53%   | 22.47%   | 19.13%   |
| 财务费用         | 231.29     | 268.23    | 258.26    | 311.20    | 319.28     | 债务净利率       | 10.13%   | 10.00%   | 9.90%    | 9.66%    | 9.41%    |
| 资产减值损失       | 12.41      | (0.79)    | (1.20)    | (1.00)    | (1.00)     | 净资产利润率      |          |          |          |          |          |
| 加: 投资收益/公允价值 | 626.57     | 720.99    | 516.00    | 546.00    | 635.00     | ROE         | 15.35%   | 14.08%   | 14.51%   | 15.05%   | 16.65%   |
| 营业利润         | 3095.21    | 4353.43   | 4872.38   | 5733.34   | 7417.31    | ROA         | 1.83%    | 2.01%    | 3.87%    | 4.08%    | 4.6%     |
| 利润总额         | 3083.15    | 4366.79   | 4869.45   | 5730.41   | 7414.26    | ROIC        | 2.96%    | 3.97%    | 6.69%    | 6.71%    | 7.42%    |
| 减: 所得税       | 682.54     | 1076.04   | 1081.36   | 1296.10   | 1601.85    | 资本成本        | 11.86%   | 13.96%   | 15.26%   | 16.01%   | 16.20%   |
| 净利润          | 2400.61    | 3313.85   | 3788.09   | 4434.31   | 5791.54    | 销售净利率       | 18.99%   | 39.87%   | 15.26%   | 20.18%   | 32.00%   |
| 减: 少数股东损益    | 117.43     | 531.59    | 589.85    | 736.10    | 1086.71    | EBIT 净利率    | 30.01%   | 40.95%   | 99.18%   | 10.17%   | 14.24%   |
| 归属母公司净利润     | 2283.19    | 2782.26   | 3198.24   | 3698.21   | 4632.82    | EBITDA 净利率  | 29.79%   | 40.37%   | 96.34%   | 10.08%   | 13.11%   |
| 资产负债表        | 2018A      | 2019A     | 2020E     | 2021E     | 2022E      | 净利润增长率      | 35.54%   | 38.04%   | 14.10%   | 17.26%   | 28.98%   |
| 货币资金         | 1960.93    | 2783.76   | 2252.49   | 2749.23   | 3636.08    | 总资产增长率      | 30.38%   | 28.60%   | 3.39%    | 4.38%    | 0.22%    |
| 应收账款和应收款     | 8303.24    | 9433.46   | 8835.36   | 9328.09   | 10567.85   | 权益类增长率      | 25.17%   | 32.84%   | 11.31%   | 11.77%   | 13.19%   |
| 存货           | 128416.46  | 159045.47 | 170897.75 | 175393.72 | 164362.50  | 经营费用增长率     | 0.12%    | 18.93%   | 9.34%    | 2.45%    | -5.36%   |
| 长期股权投资       | 13647.74   | 21392.01  | 21392.01  | 21392.01  | 21392.01   | 无形资产        | 82.17%   | 81.59%   | 81.02%   | 80.53%   | 78.85%   |
| 投资性房地产       | 6456.36    | 8324.87   | 9940.87   | 11366.87  | 12021.87   | 投资类资产       | 49.33%   | 45.74%   | 48.55%   | 47.97%   | 46.22%   |
| 资产总计         | 2376.55    | 4891.32   | 4891.32   | 4891.32   | 4891.32    | 非流动资产       | 42.44%   | 37.51%   | 36.31%   | 35.21%   | 31.42%   |
| 短期借款         | 838.19     | 154.98    | 90.49     | 6.00      | 6.00       | 流动资产        | 173.60%  | 170.49%  | 173.10%  | 172.70%  | 172.49%  |
| 应付账款         | 10486.62   | 23213.28  | 23992.42  | 23996.90  | 24122.28   | 长期借款        | 28.47%   | 29.37%   | 24.74%   | 27.42%   | 35.05%   |
| 长期借款         | 12655.63   | 12308.18  | 8668.96   | 7404.01   | 1959.15    | 应付利息        | 27.81%   | 0.00%    | 30.00%   | 30.00%   | 30.00%   |
| 应付债券         | 54024.37   | 83666.13  | 89130.50  | 96243.03  | 109390.23  | 公允价值        | 72.17%   | 100.00%  | 70.00%   | 70.00%   | 70.00%   |
| 所有者权益        | 31314.04   | 34686.48  | 34686.48  | 34686.48  | 34686.48   | 货币资金        | 0.13     | 0.16     | 0.16     | 0.18     | 0.21     |
| 留存收益         | 148362.42  | 189388.14 | 194342.28 | 202996.48 | 198326.28  | 交易性金融资产     | 34.04    | 41.66    | 44.13    | 53.45    | 71.10    |
| 归属母公司权益      | 211795     | 211722    | 211722    | 211722    | 211722     | 应收类资产       | 1960.41  | 943.62   | 1220.02  | 1535.38  | 1618.98  |
| 少数股东权益       | 11349.23   | 16535.70  | 18769.56  | 21392.01  | 24601.29   | 其他流动资产      | 14877.04 | 19757.12 | 21990.98 | 24793.73 | 27822.71 |
| 负债和所有者权益     | 14877.04   | 19757.12  | 21990.98  | 24793.73  | 27822.71   | 公允价值        | 0.13     | 0.16     | 0.16     | 0.19     | 0.27     |
| 现金流量表        | 2018A      | 2019A     | 2020E     | 2021E     | 2022E      | 经营和折旧摊销     | 2018A    | 2019A    | 2020E    | 2021E    | 2022E    |
| 经营活动现金流      | 16003.67   | 27999.63  | 2008.21   | 10575.21  | 23849.61   | EPS (元)     | 1.08     | 1.31     | 1.51     | 1.75     | 2.19     |
| 投资活动现金流      | (11029.36) | (3217.50) | (1162.20) | (902.20)  | (902.20)   | ROIC (%)    | 7.02     | 9.33     | 10.39    | 11.61    | 13.14    |
| 筹资活动现金流      | 22684.63   | 10791.21  | (8419.36) | (5917.76) | (14131.69) | ROE (%)     | 7.03     | 5.77     | 5.03     | 4.31     | 3.46     |
| 现金净增加额       | 7648.25    | 6652.36   | (4912.27) | 4625.76   | 8815.76    | ROA (%)     | 1.08     | 0.81     | 0.73     | 0.65     | 0.58     |

资料来源: Wind 数据, 财信证券

此报告仅供内部客户参考

财信证券

PaddleOCR-VL

财信证券  
CASHWIN SECURITIES

公司研究报告

**财务预测摘要**

| 利润表          | 2018A      | 2019A     | 2020E     | 2021E     | 2022E      | 资产负债表       | 2018A    | 2019A    | 2020E    | 2021E    | 2022E    |
|--------------|------------|-----------|-----------|-----------|------------|-------------|----------|----------|----------|----------|----------|
| 营业收入         | 2369.93    | 3314.08   | 3820.52   | 4591.51   | 6060.34    | 权益类         |          |          |          |          |          |
| 成本/费用        | 1724.68    | 2331.28   | 2721.66   | 3286.93   | 4324.60    | 无利率         | 27.29%   | 29.62%   | 28.76%   | 28.35%   | 27.69%   |
| 营业利润         | 1977.70    | 3146.31   | 3407.96   | 4040.36   | 5333.53    | 公允价值        | 8.50%    | 8.70%    | 8.41%    | 8.20%    | 7.70%    |
| 管理费用         | 915.83     | 1324.66   | 1505.31   | 1767.74   | 2321.20    | EBITDA/营业收入 | 11.96%   | 14.07%   | 24.32%   | 22.29%   | 19.29%   |
| 营业费用         | 866.96     | 1291.71   | 1459.46   | 1712.64   | 2133.41    | EBITDA/营业利润 | 14.33%   | 14.40%   | 24.53%   | 22.47%   | 19.13%   |
| 财务费用         | 231.29     | 268.23    | 258.26    | 311.20    | 319.28     | 债务净利率       | 10.13%   | 10.00%   | 9.90%    | 9.66%    | 9.41%    |
| 资产减值损失       | 12.41      | (0.79)    | (1.20)    | (1.00)    | (1.00)     | 净资产利润率      |          |          |          |          |          |
| 加: 投资收益/公允价值 | 626.57     | 720.99    | 516.00    | 546.00    | 635.00     | ROE         | 15.35%   | 14.08%   | 14.51%   | 15.05%   | 16.65%   |
| 营业利润         | 3095.21    | 4353.43   | 4872.38   | 5733.34   | 7417.31    | ROA         | 1.83%    | 2.01%    | 3.87%    | 4.08%    | 4.6%     |
| 利润总额         | 3083.15    | 4366.79   | 4869.45   | 5730.41   | 7414.26    | ROIC        | 2.96%    | 3.97%    | 6.69%    | 6.71%    | 7.42%    |
| 减: 所得税       | 682.54     | 1076.04   | 1081.36   | 1296.10   | 1601.85    | 资本成本        | 11.86%   | 13.96%   | 15.26%   | 16.01%   | 16.20%   |
| 净利润          | 2400.61    | 3313.85   | 3788.09   | 4434.31   | 5791.54    | 销售净利率       | 18.99%   | 39.87%   | 15.26%   | 20.18%   | 32.00%   |
| 减: 少数股东损益    | 117.43     | 531.59    | 589.85    | 736.10    | 1086.71    | EBIT 净利率    | 30.01%   | 40.95%   | 99.18%   | 10.17%   | 14.24%   |
| 归属母公司净利润     | 2283.19    | 2782.26   | 3198.24   | 3698.21   | 4632.82    | EBITDA 净利率  | 29.79%   | 40.37%   | 96.34%   | 10.08%   | 13.11%   |
| 资产负债表        | 2018A      | 2019A     | 2020E     | 2021E     | 2022E      | 净利润增长率      | 35.54%   | 38.04%   | 14.10%   | 17.26%   | 28.98%   |
| 货币资金         | 1960.93    | 2783.76   | 2252.49   | 2749.23   | 3636.08    | 总资产增长率      | 30.38%   | 28.60%   | 3.39%    | 4.38%    | 0.22%    |
| 应收账款和应收款     | 8303.24    | 9433.46   | 8835.36   | 9328.09   | 10567.85   | 权益类增长率      | 25.17%   | 32.84%   | 11.31%   | 11.77%   | 13.19%   |
| 存货           | 128416.46  | 159045.47 | 170897.75 | 175393.72 | 164362.50  | 经营费用增长率     | 0.12%    | 18.93%   | 9.34%    | 2.45%    | -5.36%   |
| 长期股权投资       | 13647.74   | 21392.01  | 21392.01  | 21392.01  | 21392.01   | 无形资产        | 82.17%   | 81.59%   | 81.02%   | 80.53%   | 78.85%   |
| 投资性房地产       | 6456.36    | 8324.87   | 9940.87   | 11366.87  | 12021.87   | 投资类资产       | 49.33%   | 45.74%   | 48.55%   | 47.97%   | 46.22%   |
| 资产总计         | 2376.55    | 4891.32   | 4891.32   | 4891.32   | 4891.32    | 非流动资产       | 42.44%   | 37.51%   | 36.31%   | 35.21%   | 31.42%   |
| 短期借款         | 838.19     | 154.98    | 90.49     | 6.00      | 6.00       | 流动资产        | 173.60%  | 170.49%  | 173.10%  | 172.70%  | 172.49%  |
| 应付账款         | 10486.62   | 23213.28  | 23992.42  | 23996.90  | 24122.28   | 长期借款        | 28.47%   | 29.37%   | 24.74%   | 27.42%   | 35.05%   |
| 长期借款         | 12655.63   | 12308.18  | 8668.96   | 7404.01   | 1959.15    | 应付利息        | 27.81%   | 0.00%    | 30.00%   | 30.00%   | 30.00%   |
| 应付债券         | 54024.37   | 83666.13  | 89130.50  | 96243.03  | 109390.23  | 公允价值        | 72.17%   | 100.00%  | 70.00%   | 70.00%   | 70.00%   |
| 所有者权益        | 31314.04   | 34686.48  | 34686.48  | 34686.48  | 34686.48   | 货币资金        | 0.13     | 0.16     | 0.16     | 0.18     | 0.21     |
| 留存收益         | 148362.42  | 189388.14 | 194342.28 | 202996.48 | 198326.28  | 交易性金融资产     | 34.04    | 41.66    | 44.13    | 53.45    | 71.10    |
| 归属母公司权益      | 211795     | 211722    | 211722    | 211722    | 211722     | 应收类资产       | 1960.41  | 943.62   | 1220.02  | 1535.38  | 1618.98  |
| 少数股东权益       | 11349.23   | 16535.70  | 18769.56  | 21392.01  | 24601.29   | 其他流动资产      | 14877.04 | 19757.12 | 21990.98 | 24793.73 | 27822.71 |
| 负债和所有者权益     | 14877.04   | 19757.12  | 21990.98  | 24793.73  | 27822.71   | 公允价值        | 0.13     | 0.16     | 0.16     | 0.19     | 0.27     |
| 现金流量表        | 2018A      | 2019A     | 2020E     | 2021E     | 2022E      | 经营和折旧摊销     | 2018A    | 2019A    | 2020E    | 2021E    | 2022E    |
| 经营活动现金流      | 16003.67   | 27999.63  | 2008.21   | 10575.21  | 23849.61   | EPS (元)     | 1.08     | 1.31     | 1.51     | 1.75     | 2.19     |
| 投资活动现金流      | (11029.36) | (3217.50) | (1162.20) | (902.20)  | (902.20)   | ROIC (%)    | 7.02     | 9.33     | 10.39    | 11.61    | 13.14    |
| 筹资活动现金流      | 22684.63   | 10791.21  | (8419.36) | (5917.76) | (14131.69) | ROE (%)     | 7.03     | 5.77     | 5.03     | 4.31     | 3.46     |
| 现金净增加额       | 7648.25    | 6652.36   | (4912.27) | 4625.76   | 8815.76    | ROA (%)     | 1.08     | 0.81     | 0.73     | 0.65     | 0.58     |

资料来源: Wind 数据, 财信证券

此报告仅供内部客户参考

财信证券

MinerU2.5

财信证券  
CASHWIN SECURITIES

公司研究报告

**财务预测摘要**

| 利润表          | 2018A   | 2019A   | 2020E   | 2021E   | 2022E   | 资产负债表       | 2018A  | 2019A  | 2020E  | 2021E  | 2022E  |
|--------------|---------|---------|---------|---------|---------|-------------|--------|--------|--------|--------|--------|
| 营业收入         | 2369.93 | 3314.08 | 3820.52 | 4591.51 | 6060.34 | 权益类         |        |        |        |        |        |
| 成本/费用        | 1724.68 | 2331.28 | 2721.66 | 3286.93 | 4324.60 | 无利率         | 27.29% | 29.62% | 28.76% | 28.35% | 27.69% |
| 营业利润         | 1977.70 | 3146.31 | 3407.96 | 4040.36 | 5333.53 | 公允价值        | 8.50%  | 8.70%  | 8.41%  | 8.20%  | 7.70%  |
| 管理费用         | 915.83  | 1324.66 | 1505.31 | 1767.74 | 2321.20 | EBITDA/营业收入 | 11.96% | 14.07% | 24.32% | 22.29% | 19.29% |
| 营业费用         | 866.96  | 1291.71 | 1459.46 | 1712.64 | 2133.41 | EBITDA/营业利润 | 14.33% | 14.40% | 24.53% | 22.47% | 19.13% |
| 财务费用         | 231.29  | 268.23  | 258.26  | 311.20  | 319.28  | 债务净利率       | 10.13% | 10.00% | 9.90%  | 9.66%  | 9.41%  |
| 资产减值损失       | 12.41   | (0.79)  | (1.20)  | (1.00)  | (1.00)  | 净资产利润率      |        |        |        |        |        |
| 加: 投资收益/公允价值 | 626.57  | 720.99  | 516.00  | 546.00  | 635.00  | ROE         | 15.35% | 14.08% | 14.51% | 15.05% | 16.65% |
| 营业利润         | 3095.21 | 4353.43 | 4872.38 | 5733.34 | 7417.31 | ROA         | 1.83%  | 2.01%  | 3.87%  | 4.08%  | 4.6%   |
| 利润总额         | 3083.15 | 4366.79 | 4869.45 | 5730.41 | 7414.26 | ROIC        | 2.96%  | 3.97%  | 6.69%  | 6.71%  | 7.42%  |
| 减: 所得税       | 682.54  | 1076.04 | 1081.36 | 1296.10 | 1601.85 | 资本成本        | 11.86% | 13.96% | 1      |        |        |

Date No.

例3. 某生物兴趣小组利用本校4年 解析: 由表中数据知男性患者较多, 来全体学生的体检结果进行红绿色 原因是男性只要X染色体上有致病基 盲发病率调查, 结果如T, 则下列推 因, 就一定患病, 而女性要2条X染色体 测或结论正确的是(ABC) 上同时有致病基因时才是病一件X

|    |     |     |     |
|----|-----|-----|-----|
| 9届 | 10届 | 11届 | 12届 |
| 男  | 女   | 男   | 女   |
| 女  | 男   | 女   | 男   |

隐性遗传病的特点, 而红绿色盲为 伴X隐性遗传病, 同时女性患者两条 正常 404 398 524 432 436 328 402 298

红绿色盲 8 0 13 1 6 0 12 0 X染色体, 一条来自父方, 所以父方一定是 上部含色盲基因时才是患病  $436+328+402+298 = 1.23\%$

D. 该调查群体中色盲发病率约为1.4%

例4. 人的X染色体和Y染色体大小、形态 解析: 由图可知, II区段为Y染色体特有, 因 不完全相同, 但存在着同源区(II)与非同 此区上有控制男性性别决定的基因, 且上述基 源区(I, II)如下图, 因此可推測 (AB) 控制的遗传病是应全为男性 (女性体内无I上 的基因, I区断为X染色体所有, 其上隐性基因控 制的病女性是少于男性患者, 因此女性患者 重要两条X染色体均含该隐性基因才是病, II片 断为X,Y染色体同源区, 但其上基因控制的 病与性别有关 遗传病与常染色体遗传并不相同, 男性患 病与女性患病并不总是相同, 如 $X^mX^c$  均为女性  $X^mY$ 子代中女性均正常, 男性均是患病, 再如  $X^mX^c \times X^mY$ , 子代中女性均是患病, 男性均 性患者高于男性患者 正常, 所以患病率与性别无关.

168

Date No.

例3. 某生物兴趣小组利用本校4年 解析: 由表中数据知男性患者较多, 来全体学生的体检结果进行红绿色 原因是男性只要X染色体上有致病基 盲发病率调查, 结果如T, 则下列推 因, 就一定患病, 而女性要2条X染色体 测或结论正确的是(ABC) 上同时有致病基因时才是病一件X

|    |     |     |     |
|----|-----|-----|-----|
| 9届 | 10届 | 11届 | 12届 |
| 男  | 女   | 男   | 女   |
| 女  | 男   | 女   | 男   |

隐性遗传病的特点, 而红绿色盲为 伴X隐性遗传病, 同时女性患者两条 正常 404 398 524 432 436 328 402 298

红绿色盲 8 0 13 1 6 0 12 0 X染色体, 一条来自父方, 所以父方一定是 上部含色盲基因时才是患病  $436+328+402+298 = 1.23\%$

D. 该调查群体中色盲发病率约为1.4%

例4. 人的X染色体和Y染色体大小、形态 解析: 由图可知, II区段为Y染色体特有, 因 不完全相同, 但存在着同源区(II)与非同 此区上有控制男性性别决定的基因, 且上述基 源区(I, II)如下图, 因此可推測 (AB) 控制的遗传病是应全为男性 (女性体内无I上 的基因, I区断为X染色体所有, 其上隐性基因控 制的病女性是少于男性患者, 因此女性患者 重要两条X染色体均含该隐性基因才是病, II片 断为X,Y染色体同源区, 但其上基因控制的 病与性别有关 遗传病与常染色体遗传并不相同, 男性患 病与女性患病并不总是相同, 如 $X^mX^c$  均为女性  $X^mY$ 子代中女性均正常, 男性均是患病, 再如  $X^mX^c \times X^mY$ , 子代中女性均是患病, 男性均 性患者高于男性患者 正常, 所以患病率与性别无关.

168

Date No.

例3. 某生物兴趣小组利用本校4年 解析: 由表中数据知男性患者较多, 来全体学生的体检结果进行红绿色 原因是男性只要X染色体上有致病基 盲发病率调查, 结果如T, 则下列推 因, 就一定患病, 而女性要2条X染色体 测或结论正确的是(ABC) 上同时有致病基因时才是病一件X

|    |     |     |     |
|----|-----|-----|-----|
| 9届 | 10届 | 11届 | 12届 |
| 男  | 女   | 男   | 女   |
| 女  | 男   | 女   | 男   |

隐性遗传病的特点, 而红绿色盲为 伴X隐性遗传病, 同时女性患者两条 正常 404 398 524 432 436 328 402 298

红绿色盲 8 0 13 1 6 0 12 0 X染色体, 一条来自父方, 所以父方一定是 上部含色盲基因时才是患病  $436+328+402+298 = 1.23\%$

D. 该调查群体中色盲发病率约为1.4%

例4. 人的X染色体和Y染色体大小、形态 解析: 由图可知, II区段为Y染色体特有, 因 不完全相同, 但存在着同源区(II)与非同 此区上有控制男性性别决定的基因, 且上述基 源区(I, II)如下图, 因此可推測 (AB) 控制的遗传病是应全为男性 (女性体内无I上 的基因, I区断为X染色体所有, 其上隐性基因控 制的病女性是少于男性患者, 因此女性患者 重要两条X染色体均含该隐性基因才是病, II片 断为X,Y染色体同源区, 但其上基因控制的 病与性别有关 遗传病与常染色体遗传并不相同, 男性患 病与女性患病并不总是相同, 如 $X^mX^c$  均为女性  $X^mY$ 子代中女性均正常, 男性均是患病, 再如  $X^mX^c \times X^mY$ , 子代中女性均是患病, 男性均 性患者高于男性患者 正常, 所以患病率与性别无关.

168

Date No.

例3. 某生物兴趣小组利用本校4年 解析: 由表中数据知男性患者较多, 来全体学生的体检结果进行红绿色 原因是男性只要X染色体上有致病基 盲发病率调查, 结果如T, 则下列推 因, 就一定患病, 而女性要2条X染色体 测或结论正确的是(ABC) 上同时有致病基因时才是病一件X

|    |     |     |     |
|----|-----|-----|-----|
| 9届 | 10届 | 11届 | 12届 |
| 男  | 女   | 男   | 女   |
| 女  | 男   | 女   | 男   |

隐性遗传病的特点, 而红绿色盲为 伴X隐性遗传病, 同时女性患者两条 正常 404 398 524 432 436 328 402 298

红绿色盲 8 0 13 1 6 0 12 0 X染色体, 一条来自父方, 所以父方一定是 上部含色盲基因时才是患病  $436+328+402+298 = 1.23\%$

D. 该调查群体中色盲发病率约为1.4%

例4. 人的X染色体和Y染色体大小、形态 解析: 由图可知, II区段为Y染色体特有, 因 不完全相同, 但存在着同源区(II)与非同 此区上有控制男性性别决定的基因, 且上述基 源区(I, II)如下图, 因此可推測 (AB) 控制的遗传病是应全为男性 (女性体内无I上 的基因, I区断为X染色体所有, 其上隐性基因控 制的病女性是少于男性患者, 因此女性患者 重要两条X染色体均含该隐性基因才是病, II片 断为X,Y染色体同源区, 但其上基因控制的 病与性别有关 遗传病与常染色体遗传并不相同, 男性患 病与女性患病并不总是相同, 如 $X^mX^c$  均为女性  $X^mY$ 子代中女性均正常, 男性均是患病, 再如  $X^mX^c \times X^mY$ , 子代中女性均是患病, 男性均 性患者高于男性患者 正常, 所以患病率与性别无关.

168

Figure S31. Compare with others in Layout Detection.



## Image

### संदर्भ :

1. मीना, मधु एवं डॉ. कल्पना लाल। "अमरकंटक के उपन्यास साहित्य में सामाजिक चर्चाएं" International Research Journal of Management Sociology & Humanities (IRJMSH), खंड 9, अंक 4, 2018, पृष्ठ 307-309।
2. मीनाक्षी एवं डॉ. नविता रानी। "हिंदी साहित्य में आधुनिक दलित विमर्श के साहित्य की अवधारणा का अध्ययन" Journal of Advances and Scholarly Researches in Allied Education (JASRAE), खंड 18, अंक 4, 2021, पृष्ठ 1014-1020।
3. लता, सुमन एवं डॉ. विनोद कुमार यादव। "हिंदी साहित्य में प्रेमचंद का दलित विमर्श के संदर्भ में विश्लेषणात्मक अध्ययन" Journal of Advances and Scholarly Researches in Allied Education (JASRAE), खंड 17, अंक 1, 2020, पृष्ठ 401-405।
4. लता, सुमन एवं डॉ. विनोद कुमार यादव। "हिंदी साहित्य में आधुनिक दलित विमर्श" Journal of Advances and Scholarly Researches in Allied Education (JASRAE), खंड 18, अंक 1, 2021, पृष्ठ 219-225।
5. अज्ञात। "प्रेमचंद के कथा साहित्य में भारत की दलित महिलाओं की सामाजिक स्थिति का चित्रण" RESEARCH REVIEW International Journal of Multidisciplinary, खंड 3, अंक 12, 2018।
6. लामा, सारेज। "ओमप्रकाश वाल्मीकि के साहित्य में दलित चेहरा"। नवंबर बंगाल विश्वविद्यालय रोच पत्र, 2021, पृष्ठ 253।
7. सिंह, डॉ. रामनारायण। "हिंदी कथा साहित्य में दलित विमर्श" साहित्य सागर, खंड 12, अंक 2, 2019, पृष्ठ 45-52।
8. चर्मा, डॉ. सुभद्रा। "अमरकंटक की कहानियों में दलित संवेदना" हिंदी अनुसंधान, खंड 15, अंक 1, 2020, पृष्ठ 33-40।
9. कुमार, डॉ. अरुण। "अमरकंटक की कहानियों में दलित संवेदना" समाज विज्ञान शोध पत्रिका, खंड 22, अंक 3, 2018, पृष्ठ 89-96।
10. वर्मा, डॉ. रेखा। "हिंदी उपन्यासों में दलित विमर्श" साहित्य समीक्षा, खंड 18, अंक 4, 2021, पृष्ठ 112-118।
11. सिंह, डॉ. मनीष। "अमरकंटक के साहित्य में सामाजिक न्याय की अवधारणा" हिंदी साहित्य परिषद्, खंड 7, अंक 2, 2019, पृष्ठ 58-65।
12. मिश्रा, डॉ. विनोद। "दलित विमर्श और हिंदी कहानी" कथा धरती, खंड 14, अंक 3, 2020, पृष्ठ 77-84।
13. ओझा, डॉ. कविता। "अमरकंटक की कहानियों में दलित संवेदना" साहित्य लोक, खंड 9, अंक 1, 2021, पृष्ठ 25-32।
14. कुमार, डॉ. राकेश। "दलित साहित्य: संरचना और संदर्भ" साहित्य विमर्श, खंड 11, अंक 2, 2018, पृष्ठ 99-106।
15. सिंह, डॉ. प्रीति। "हिंदी कहानी में दलित चेहरा" कथा सागर, खंड 16, अंक 3, 2019, पृष्ठ 66-73।
16. कुमार, डॉ. रवीश। "अमरकंटक के साहित्य में ग्रामीण जीवन और दलित चर्चा" हिंदी साहित्य चर्चा, खंड 10, अंक 2, 2020, पृष्ठ 41-48।
17. कुमार, डॉ. संजीव। "दलित विमर्श: एक पुनर्विचार" साहित्य संवाद, खंड 13, अंक 1, 2021, पृष्ठ 54-61।
18. प्रभा, डॉ. रश्मि। "अमरकंटक की कहानियों में सामाजिक न्याय और दलित जीवन" कथा जगत, खंड 8, अंक 4, 2019, पृष्ठ 29-36।
19. चर्मा, डॉ. नवीन। "दलित साहित्य का विकास और उसकी भूमिका" साहित्य यात्रा, खंड 17, अंक 2, 2020, पृष्ठ 63-71।
20. गुप्त, डॉ. सुरेश। "अमरकंटक की कहानियों में दलित जीवन और संघर्ष" हिंदी साहित्य समीक्षा, खंड 20, अंक 1, 2021, पृष्ठ 88-95।
21. सक्सेना, डॉ. अरिता। "हिंदी कथा साहित्य में दलित विमर्श की प्रवृत्तियाँ" भारतीय साहित्य शोध पत्रिका, खंड 19, अंक 3, 2020, पृष्ठ 74-82।

## PaddleOCR-VL

### संदर्भ :

1. मीना, मधु एवं डॉ. कल्पना लाल। "अमरकंटक के उपन्यास साहित्य में सामाजिक चर्चाएं" International Research Journal of Management Sociology & Humanities (IRJMSH), खंड 9, अंक 4, 2018, पृष्ठ 307-309।
2. मीनाक्षी एवं डॉ. नविता रानी। "हिंदी साहित्य में आधुनिक दलित विमर्श के साहित्य की अवधारणा का अध्ययन" Journal of Advances and Scholarly Researches in Allied Education (JASRAE), खंड 18, अंक 4, 2021, पृष्ठ 1014-1020।
3. लता, सुमन एवं डॉ. विनोद कुमार यादव। "हिंदी साहित्य में प्रेमचंद का दलित विमर्श के संदर्भ में विश्लेषणात्मक अध्ययन" Journal of Advances and Scholarly Researches in Allied Education (JASRAE), खंड 17, अंक 1, 2020, पृष्ठ 401-405।
4. लता, सुमन एवं डॉ. विनोद कुमार यादव। "हिंदी साहित्य में आधुनिक दलित विमर्श" Journal of Advances and Scholarly Researches in Allied Education (JASRAE), खंड 18, अंक 1, 2021, पृष्ठ 219-225।
5. अज्ञात। "प्रेमचंद के कथा साहित्य में भारत की दलित महिलाओं की सामाजिक स्थिति का चित्रण" RESEARCH REVIEW International Journal of Multidisciplinary, खंड 3, अंक 12, 2018।
6. लामा, सारेज। "ओमप्रकाश वाल्मीकि के साहित्य में दलित चेहरा"। नवंबर बंगाल विश्वविद्यालय रोच पत्र, 2021, पृष्ठ 253।
7. सिंह, डॉ. रामनारायण। "हिंदी कथा साहित्य में दलित विमर्श" साहित्य सागर, खंड 12, अंक 2, 2019, पृष्ठ 45-52।
8. चर्मा, डॉ. सुभद्रा। "अमरकंटक की कहानियों में दलित संवेदना" हिंदी अनुसंधान, खंड 15, अंक 1, 2020, पृष्ठ 33-40।
9. कुमार, डॉ. अरुण। "अमरकंटक की कहानियों में दलित संवेदना" समाज विज्ञान शोध पत्रिका, खंड 22, अंक 3, 2018, पृष्ठ 89-96।
10. वर्मा, डॉ. रेखा। "हिंदी उपन्यासों में दलित विमर्श" साहित्य समीक्षा, खंड 18, अंक 4, 2021, पृष्ठ 112-118।
11. सिंह, डॉ. मनीष। "अमरकंटक के साहित्य में सामाजिक न्याय की अवधारणा" हिंदी साहित्य विमर्श, खंड 7, अंक 2, 2019, पृष्ठ 58-65।
12. मिश्रा, डॉ. विनोद। "दलित विमर्श और हिंदी कहानी" कथा भारतीय, खंड 14, अंक 3, 2020, पृष्ठ 77-84।
13. ओझा, डॉ. कविता। "अमरकंटक की कहानियों में दलित संवेदना" साहित्य लोक, खंड 9, अंक 1, 2021, पृष्ठ 25-32।
14. कुमार, डॉ. राकेश। "दलित साहित्य: संरचना और संदर्भ" साहित्य विमर्श, खंड 11, अंक 2, 2018, पृष्ठ 99-106।
15. सिंह, डॉ. प्रीति। "हिंदी कहानी में दलित चेहरा" कथा सागर, खंड 16, अंक 3, 2019, पृष्ठ 66-73।
16. कुमार, डॉ. रवीश। "अमरकंटक के साहित्य में ग्रामीण जीवन और दलित चर्चा" हिंदी साहित्य चर्चा, खंड 10, अंक 2, 2020, पृष्ठ 41-48।
17. कुमार, डॉ. संजीव। "दलित विमर्श: एक पुनर्विचार" साहित्य संवाद, खंड 13, अंक 1, 2021, पृष्ठ 54-61।
18. प्रभा, डॉ. रश्मि। "अमरकंटक की कहानियों में सामाजिक न्याय और दलित जीवन" कथा जगत, खंड 8, अंक 4, 2019, पृष्ठ 29-36।
19. चर्मा, डॉ. नवीन। "दलित साहित्य का विकास और उसकी भूमिका" साहित्य यात्रा, खंड 17, अंक 2, 2020, पृष्ठ 63-71।
20. गुप्त, डॉ. सुरेश। "अमरकंटक की कहानियों में दलित जीवन और संघर्ष" हिंदी साहित्य समीक्षा, खंड 20, अंक 1, 2021, पृष्ठ 88-95।
21. सक्सेना, डॉ. अरिता। "हिंदी कथा साहित्य में दलित विमर्श की प्रवृत्तियाँ" भारतीय साहित्य शोध पत्रिका, खंड 19, अंक 3, 2020, पृष्ठ 74-82।

## MinerU2.5

1. Minna, Mshu e. kLepnla Lalll "Amarokali te uynpnys rahmamok
2. Minanakli Eevd nivlatra rani "Hcdi Sahaley me Aahuyink dolit vimgrh k saheily kio Achbargarana ka Aghayn" Journal of Advances and Scholarly Researches in Allied Education (JASRAE), 18, 4, 2021, p 1014-1020
3. लता, सुमन एवं डॉ. विनोद कुमार यादव। "हिंदी साहित्य में प्रेमचंद का दलित विमर्श के संदर्भ में विश्लेषणात्मक अध्ययन" Journal of Advances and Scholarly Researches in Allied Education (JASRAE), 17, 2020, p 401-405
4. लता, सुमन एवं डॉ. विनोद कुमार यादव। "हिंदी साहित्य में आधुनिक दलित विमर्श" Journal of Advances and Scholarly Researches in Allied Education (JASRAE), 18, 2021, p 219-225
5. अज्ञात। "प्रेमचंद के कथा साहित्य में भारत की दलित महिलाओं की सामाजिक स्थिति का चित्रण" RESEARCH REVIEW International Journal of Multidisciplinary, 3, 2018
6. Lama, Sarej | "Aomprakavh valmikike k sahily me dolit chehna" naegb gal viy dhay 253
7. Si, 2019, p 45-52
8. 8.
9. kumar, 2. Aajay | "dolit sahily k a mamajhraeogy Aghypan" smanan vishan 800 pplikrka, 22, 3, 2018, 89-96
10. 112-118
11. SiH, dA. mnila | "Amarokot k sahily me saamaiknaya k i Aovharga" hdi t sahily parrkma, 7, 2019, 58-65
12. 12.
13. Jai, d. kvital | "Amrakat ki kahinay me hairay ke log" sahily lok, 9, 2021, p 25-32
14. kumar, 2. rai.
15. 15.
16. kumar, 2. rakeh "Amrakatke sahily me gann Jown and dolit pah" hdi sahily y 10, 2020, 41-48
17. kumar, 2.5.55
18. (text) \math { H } \_ { ( 1 ) } , ,
19. Sam, 2. nivini | "dolit sahilyl kai vikas Aor uskki bimikali" sahily yarra, 17, 2020, 63-71
20. 1857, 20.
21. 54

Text Error

## MonkeyOCR

### sundhri:

1. "Manna, Muthu Ewam D. Kalyana." "Amrakant ke Ugnayds sahitya me samajik yatharth." International Research Journal of Management Sociology & Humanities (IRJMSH), Khond 9, Ank 4, 2018, p.8 307-309
2. "Manna Ewam D. Nivita Rani." "Hindi sahitya me adhunik dilit vimarsh ke sahitya ki avdharana ki achyayan." Journal of Advances and Scholarly Researches in Allied Education (JASRAE), Khond 18, Ank 4, 2021, p.8 1014-1020
3. "Latta, Surman Ewam D. Vinod Kumar Yadav." "Hindi sahitya me premchand ka dilit vimarsh ke sandbhr me visrlebatamuk achyayan." Journal of Advances and Scholarly Researches in Allied Education (JASRAE), Khond 17, Ank 1, 2020, p.8 401-405
4. "Latta, Surman Ewam D. Vinod Kumar Yadav." "Hindi sahitya me adhunik dilit vimarsh." Journal of Advances and Scholarly Researches in Allied Education (JASRAE), Khond 18, Ank 1, 2021, p.8 219-225
5. "Anzilat." "Premchand ke katha sahitya me Bharat ki dilit mahilaon ki samajik singhiti ki chitna." RESEARCH REVIEW International Journal of Multidisciplinary, Khond 3, Ank 12, 2018
6. "Lama, Saroj." "Omkrant valmikiki ke sahitya me dilit cheetana." Narong bingal visvavidyalay shodh parj, 2021, p.8 253
7. "Singh, Don. Ramnarayan." "Hindi kavya sahitya me dilit vimarsh." Sahitya Sagar, Khond 12, Ank 2, 2019, p.8 45-52
8. "Sharma, Don. Sogarna." "Amrakant ki kahaniyon me dilit savedna." Hindi Anusandhan, Khond 15, Ank 1, 2020, p.8 33-40
9. "Kumar, Don. Aajay." "Dilit sahitya ka samajamastayit achyayan." Samaj vijan shodh patrika, Khond 22, Ank 3, 2018, p.8 89-96
10. "Varma, Don. Rekha." "Hindi upnayas me dilit vimarsh." Sahitya Samiksha, Khond 18, Ank 4, 2021, p.8 112-118
11. "Singh, Don. Manna." "Amrakant ke sahitya me samajik naya ki avdharana." Hindi sahitya Pankirama, Khond 7, Ank 2, 2019, p.8 58-65
12. "Mitra, Don. Vinod." "Dilit vimarsh aur Hindi kahani." Katha Bharati, Khond 14, Ank 3, 2020, p.8 77-84
13. "Joshi, Don. Kavita." "Amrakant ki kahaniyon me hshikhe ke loja." Sahitya lojek, Khond 9, Ank 1, 2021, p.8 25-32
14. "Kumar, Don. Rojes." "Dilit sahitya: sarorip aur sandbhr." Sahitya vimarsh, Khond 11, Ank 2, 2018, p.8 99-106
15. "Singh, Don. Priiti." "Hindi kahaniya me dilit cheetana." Katha Sagar, Khond 16, Ank 3, 2019, p.8 66-73
16. "Kumar, Don. Rojes." "Amrakant ke sahitya me gramini javan aur dilit patra." Hindi sahitya charti, Khond 10, Ank 2, 2020, p.8 41-48
17. "Kumar, Don. Sargej." "Dilit vimarsh: ek purnavichar." Sahitya Savad, Khond 13, Ank 1, 2021, p.8 54-61
18. "Prabha, Don. Shashi." "Amrakant ki kahaniyon me samajik yatharsh aur dilit javan." Katha Jagat, Khond 8, Ank 4, 2019, p.8 29-36
19. "Sharma, Don. Naveen." "Dilit sahitya ka vikas aur Usawaki bohmi." Sahitya patra, Khond 17, Ank 2, 2020, p.8 63-71
20. "Gupta, Don. Suraj." "Amrakant ki kahaniyon me dilit javan aur sandbhr." Hindi sahitya Samiksha, Khond 20, Ank 1, 2021, p.8 88-95
21. "Savseena, Don. Anitta." "Hindi katha sahitya me dilit vimarsh ki pravritiya." Bharatiya sahitya shodh patrika, Khond 19, Ank 3, 2020, p.8 74-82

Figure S33. Compare with others in Multilingual Text Recognition.



## V.11.2. Handwriting Text Recognition

| Image                                                                                                                                                                                                                                                                                                                                                                                           | PaddleOCR-VL                                                                                                                                                                                                                                                                                                                                                                                                                        |
|-------------------------------------------------------------------------------------------------------------------------------------------------------------------------------------------------------------------------------------------------------------------------------------------------------------------------------------------------------------------------------------------------|-------------------------------------------------------------------------------------------------------------------------------------------------------------------------------------------------------------------------------------------------------------------------------------------------------------------------------------------------------------------------------------------------------------------------------------|
|                                                                                                                                                                                                                                                                                                                | <p>致每位同伴亚洲巡演的SWITH</p> <p>SWITH你好~</p> <p>亚洲巡演结束后怀着感激的心情写下了这封信。首先有了SWITH才能够顺利结束首次亚洲巡演。真的感谢你们一直在一起，一直来支持我们，感到很安心。在每个演唱会，粉丝签名会和者其他日程中，都能够感受到每位SWITH的温暖的真心。虽然时间较短但是能够见到你们真是个幸运。读者SWITH的每封信让我思考了很多。每个认真写下的韩文都很可爱，很多人说自己的韩语不好很抱歉，但其实完全不需要道歉!!并且想对大家说封信我都读了，都很感谢。而且我决定一定要给你们写回一封信!!感谢你们祝我安全飞行，愉快的一天，感谢你们给我问好。虽然因为日程繁忙无法体验所有的东西，但感谢你们为我推荐好看的，好吃的和能享受的东西。最重要的是感谢你们一直相信我，等着我，而且会跟我们在以后的前途会在一起。尽管我们的国籍不同，语言和文化也有差异，但通过音乐</p> <p>&lt;1&gt;</p> |
| MinerU2.5                                                                                                                                                                                                                                                                                                                                                                                       | MonkeyOCR                                                                                                                                                                                                                                                                                                                                                                                                                           |
| <p>亚洲巡演结束后怀着感激的心情写下了这封信。首先有了SWITH才能够顺利结束首次亚洲巡演。真的感谢你们一直在一起，一直来支持我们，感到很安心。在每个演唱会，粉丝签名会和者其他日程中，都能够感受到每位SWITH的温暖的真心，虽然时间较短但是能够见到你们真是个幸运。读者SWITH的每封信让我思考了很多。每个认真写下的韩文都很可爱，很多人说自己的韩语不好很抱歉，但其实完全不需要道歉”，并且想对大家说封信我都读了，都很感谢，而且我决定一定要给你们写回一封信”，感谢你们祝我安全飞行，愉快的一天，感谢你们给我问好。虽然因为日程繁忙无法体验所有的东西，但感谢你们为我推荐好看的，好吃的和能享受的东西。最重要的是感谢你们一直相信我，等着我，而且会跟我们在以后的前途会在一起。尽管我们的国籍不同，语言和文化也有差异，但通过音乐</p> <p>Missing Text</p> | <p>亚洲巡演结束后怀着感激的心情写下了这封信。首先有了SWITH才能够顺利结束首次亚洲巡演。真的感谢你们一直在一起，一直来支持我们，感到很安心。在每个演唱会，粉丝签名会和者其他日程中，都能够感受到每位SWITH的温暖的真心。虽然时间较短但是能够见到你们真是个幸运。读者SWITH的每封信让我思考了很多。每个认真写下的韩文都很可爱，很多人说自己的韩语不好很抱歉，但其实完全不需要道歉!!并且想对大家说，封信我都读了，都很感谢。而且我决定一定要给你们写回一封信!!感谢你们祝我安全飞行，愉快的一天!感谢你们给我问好。虽然因为日程繁忙无法体验所有的东西，但感谢你们为我推荐好看的，好吃的和能享受的东西。最重要的是感谢你们一直相信我，等着我，而且会跟我们在以后的前途会在一起。尽管我们的国籍不同，语言和文化也有差异，但通过音乐</p> <p>Missing Text</p>                                    |

Figure S35. Compare with others in Handwriting Text Recognition.

Image

你们，就像你们一直让我感受到的。可长大之后，我才发现成为很厉害的人并没有我想象得那么容易。我懊悔荒废的日子里，我没有为你更加努力。我害怕时光飞逝，你渐渐老去。我没能尽快让你感受到更多美好，给予你更多。所以，现在的每天，我都在努力奔跑，因为我希望有一天能成为你的骄傲。尽管我的羽翼不丰满，有膀

PaddleOCR-VL

你们，就像你们一直让我感受到的。可长大之后，我才发现成为很厉害的人并没有我想象得那么容易。我懊悔荒废的日子里，我没有为你更加努力。我害怕时光飞逝，你渐渐老去。我没能尽快让你感受到更多美好，给予你更多。所以，现在的每天，我都在努力奔跑，因为我希望有一天能成为你的骄傲。尽管我的羽翼不丰满，肩膀

MinerU2.5

你们就像你们一直让我感受到的。可长大之后，我才发现成为很厉害的人并没有我想象得那么容易。我懊悔荒废的日子里我没有为你更加努力。我害怕时光飞逝，你渐渐老去。我没能尽快让你感受到更

多美子合尔更多巧与见书

Text Error

我都在努力奔跑 因为我希望有一天成为你的骄傲。尽管我的羽翼不丰满，有膀

MonkeyOCR

你们,就像你们一直让我感受到的。可长大之后,我才发现成为很厉害的人并没有我想象得那么容易。我懊悔荒废的日子里,我没有为你更加努力。我害怕时光飞逝,你渐渐老去。我没能尽快让你感受到更多美好给予你更多。所以,现在的每天,我都在努力奔跑,因为我希望有一天能成为你的骄傲。尽管我的羽翼不满,有膀

Text Error

Figure S36. Compare with others in Handwriting Text Recognition.

### V.11.3. Vertical Text Recognition

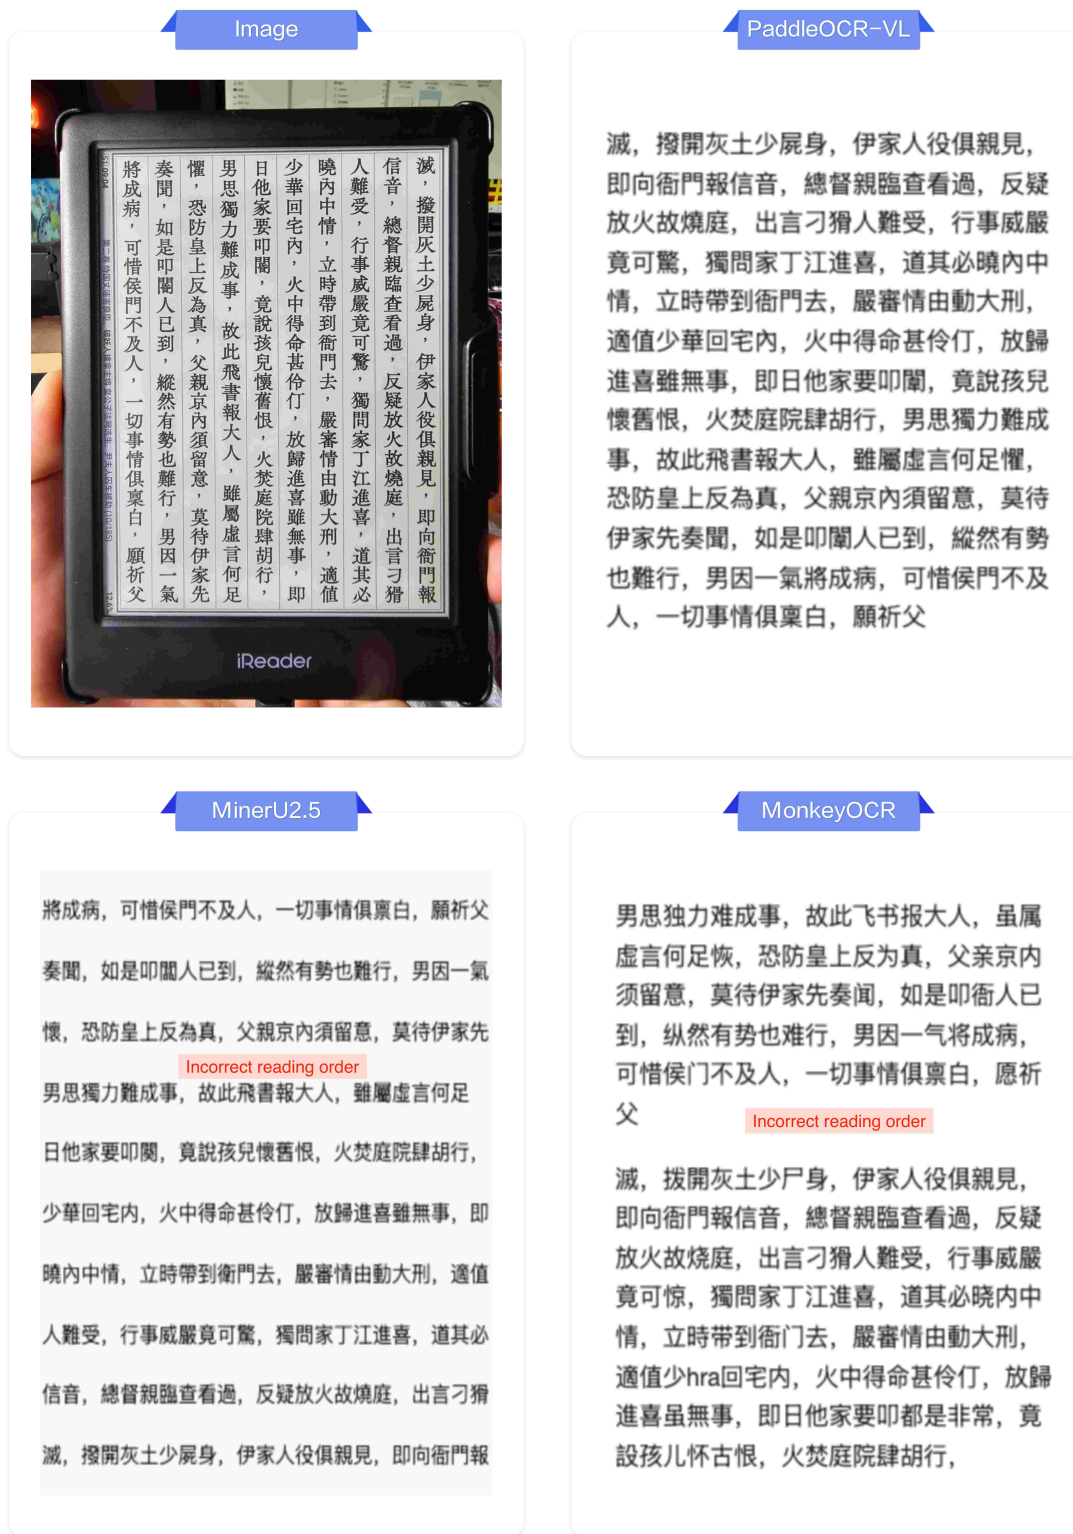

Figure S37. Compare with others in Vertical Text Recognition.



### Image

| 操作顺序 | 手势目的<br>(机械动作) | 手势图示                                                                              | 操作说明                                                               |
|------|----------------|-----------------------------------------------------------------------------------|--------------------------------------------------------------------|
| 1    | 微速起钩           |  | 两小臂水平伸向侧前方,五指伸开,手心朝上,以腕部为轴,向上摆动;当要求双机以不同速度起升时,指挥起升快的一方,手要高于另一只手    |
| 2    | 慢速起钩           |  | 两小臂水平伸向侧前方,五指伸开,手心朝上,手臂以肘部为轴向上摆动;当要求双机以不同速度起升时,指挥起升速度快的一方,手要高于另一只手 |
| 3    | 全速升钩           |  | 两臂下垂,五指伸开,手心朝上,全臂向上挥动                                              |
| 4    | 微速落钩           |  | 两小臂水平伸向侧前方,五指伸开,手心朝下,手以腕部为轴向下摆动;当要求双机以不同的速度降落时,指挥降落速度快一方,手要低于另一只手  |

### PaddleOCR-VL

| 操作顺序 | 手势目的<br>(机械动作) | 手势图示                                                                               | 操作说明                                                               |
|------|----------------|------------------------------------------------------------------------------------|--------------------------------------------------------------------|
| 1    | 微速起钩           |  | 两小臂水平伸向侧前方,五指伸开,手心朝上,以腕部为轴,向上摆动;当要求双机以不同速度起升时,指挥起升快的一方,手要高于另一只手    |
| 2    | 慢速起钩           |  | 两小臂水平伸向侧前方,五指伸开,手心朝上,手臂以肘部为轴向上摆动;当要求双机以不同速度起升时,指挥起升速度快的一方,手要高于另一只手 |
| 3    | 全速升钩           |  | 两臂下垂,五指伸开,手心朝上,全臂向上挥动                                              |
| 4    | 微速落钩           |  | 两小臂水平伸向侧前方,五指伸开,手心朝下,手以腕部为轴向下摆动;当要求双机以不同的速度降落时,指挥降落速度快一方,手要低于另一只手  |

### MinerU2.5

| 操作顺序 | 手势目的<br>(机械动作) | 手势图示                                                                                | 操作说明                                                               |
|------|----------------|-------------------------------------------------------------------------------------|--------------------------------------------------------------------|
| 1    | 微速起钩           |  | 两小臂水平伸向侧前方,五指伸开,手心朝上,以腕部为轴,向上摆动;当要求双机以不同速度起升时,指挥起升快的一方,手要高于另一只手    |
| 2    | 慢速起钩           |  | 两小臂水平伸向侧前方,五指伸开,手心朝上,手臂以肘部为轴向上摆动;当要求双机以不同速度起升时,指挥起升速度快的一方,手要高于另一只手 |
| 3    | 全速升钩           |  | 两臂下垂,五指伸开,手心朝上,全臂向上挥动                                              |
| 4    | 微速落钩           |  | 两小臂水平伸向侧前方,五指伸开,手心朝下,手以腕部为轴向下摆动;当要求双机以不同的速度降落时,指挥降落速度快一方,手要低于另一只手  |

Image Lost

### MonkeyOCR

| 操作顺序 | 手势目的<br>(机械动作) | 手势图示                                                                                 | 操作说明                                                               |
|------|----------------|--------------------------------------------------------------------------------------|--------------------------------------------------------------------|
| 1    | 微速起钩           |  | 两小臂水平伸向侧前方,五指伸开,手心朝上,以腕部为轴,向上摆动;当要求双机以不同速度起升时,指挥起升快的一方,手要高于另一只手    |
| 2    | 慢速起钩           |  | 两小臂水平伸向侧前方,五指伸开,手心朝上,手臂以肘部为轴向上摆动;当要求双机以不同速度起升时,指挥起升速度快的一方,手要高于另一只手 |
| 3    | 全速升钩           |  | 两臂下垂,五指伸开,手心朝上,全臂向上挥动                                              |
| 4    | 微速落钩           |  | 两小臂水平伸向侧前方,五指伸开,手心朝下,手以腕部为轴向下摆动;当要求双机以不同的速度降落时,指挥降落速度快一方,手要低于另一只手  |

Image Lost

Figure S39. Compare with others in Table Recognition.

### V.13. Formula Recognition

Image

13  
14)191  
14  
51  
42  
9

$$\begin{vmatrix} f(\alpha)f(\beta)f(\gamma) & 1 & \alpha & \alpha^2 \\ g(\alpha)g(\beta)g(\gamma) & 1 & \beta & \beta^2 \\ h(\alpha)h(\beta)h(\gamma) & 1 & \gamma & \gamma^2 \end{vmatrix} = \begin{vmatrix} c_0 & a_1 & a_2 & a_3 & a_4 \\ b_0 & b_1 & b_2 & b_3 & b_4 \\ c_0 & c_1 & c_2 & c_3 & c_4 \\ r & q & p & 1 & 0 \\ 0 & r & q & p & 1 \end{vmatrix}$$

$$\begin{bmatrix} a_{11} & a_{12} & a_{13} \\ a_{21} & a_{22} & a_{23} \\ a_{31} & a_{32} & a_{33} \end{bmatrix} \xrightarrow{\text{第3列加上第1列的}k\text{倍}} \begin{bmatrix} a_{11} & a_{12} & a_{13} + ka_{11} \\ a_{21} & a_{22} & a_{23} + ka_{21} \\ a_{31} & a_{32} & a_{33} + ka_{31} \end{bmatrix}$$

$$|A| = \frac{1}{2}n(n+1) \begin{vmatrix} 1 & 1 & 1 & \dots & 1 & 1 \\ 2 & 3 & 4 & \dots & n & 1 \\ 3 & 4 & 5 & \dots & 1 & 2 \\ \vdots & \vdots & \vdots & \ddots & \vdots & \vdots \\ n-1 & n & 1 & \dots & n-3 & n-2 \\ n & 1 & 2 & \dots & n-2 & n-1 \end{vmatrix}$$

$$= \frac{1}{2}n(n+1) \begin{vmatrix} 1 & 0 & 0 & \dots & 0 & 0 \\ 2 & 1 & 2 & \dots & n-2 & -1 \\ 3 & 1 & 2 & \dots & -2 & -1 \\ \vdots & \vdots & \vdots & \ddots & \vdots & \vdots \\ n-1 & 1 & 2 & \dots & n-2 & -1 \\ n & 1-n & 2-n & \dots & -2 & -1 \end{vmatrix}$$

$$= \frac{1}{2}n(n+1) \begin{vmatrix} 1 & 2 & \dots & n-2 & -1 \\ 1 & 2 & \dots & -2 & -1 \\ \vdots & \vdots & \ddots & \vdots & \vdots \\ 1 & 2-n & \dots & -2 & -1 \\ 1-n & 2-n & \dots & -2 & -1 \end{vmatrix}$$

$y = ax^2 + bx + c \ (a \neq 0)$

$= a(x-h)^2 + k$  顶点式  $h = -\frac{b}{2a}$

$= a(x-x_1)(x-x_2)$  交点式

$\vec{AB} = -2\hat{i} - 5\hat{j} \quad \vec{AC} = \hat{i} - 2\hat{j} - \hat{k}$

$\vec{AB} \times \vec{AC} = \begin{vmatrix} \hat{i} & \hat{j} & \hat{k} \\ -2 & -5 & 0 \\ 1 & -2 & -1 \end{vmatrix} = 5\hat{i} - 7\hat{j} + 4\hat{k}$

$|\vec{AB} \times \vec{AC}| = \sqrt{(5)^2 + (-7)^2 + (4)^2}$

PaddleOCR-VL

13  
14)191  
14  
51  
42  
9

$$\begin{vmatrix} f(\alpha)f(\beta)f(\gamma) & 1 & \alpha & \alpha^2 \\ g(\alpha)g(\beta)g(\gamma) & 1 & \beta & \beta^2 \\ h(\alpha)h(\beta)h(\gamma) & 1 & \gamma & \gamma^2 \end{vmatrix} = \begin{vmatrix} c_0 & a_1 & a_2 & a_3 & a_4 \\ b_0 & b_1 & b_2 & b_3 & b_4 \\ c_0 & c_1 & c_2 & c_3 & c_4 \\ r & q & p & 1 & 0 \\ 0 & r & q & p & 1 \end{vmatrix}$$

$$\begin{bmatrix} a_{11} & a_{12} & a_{13} \\ a_{21} & a_{22} & a_{23} \\ a_{31} & a_{32} & a_{33} \end{bmatrix} \xrightarrow{\text{第3列加上第1列的}k\text{倍}} \begin{bmatrix} a_{11} & a_{12} & a_{13} + ka_{11} \\ a_{21} & a_{22} & a_{23} + ka_{21} \\ a_{31} & a_{32} & a_{33} + ka_{31} \end{bmatrix}$$

$$|A| = \frac{1}{2}n(n+1) \begin{vmatrix} 1 & 1 & 1 & \dots & 1 & 1 \\ 2 & 3 & 4 & \dots & n & 1 \\ 3 & 4 & 5 & \dots & 1 & 2 \\ \vdots & \vdots & \vdots & \ddots & \vdots & \vdots \\ n-1 & n & 1 & \dots & n-3 & n-2 \\ n & 1 & 2 & \dots & n-2 & n-1 \end{vmatrix}$$

$$= \frac{1}{2}n(n+1) \begin{vmatrix} 1 & 0 & 0 & \dots & 0 & 0 \\ 2 & 1 & 2 & \dots & n-2 & -1 \\ 3 & 1 & 2 & \dots & -2 & -1 \\ \vdots & \vdots & \vdots & \ddots & \vdots & \vdots \\ n-1 & 1 & 2 & \dots & n-2 & -1 \\ n & 1-n & 2-n & \dots & -2 & -1 \end{vmatrix}$$

$$= \frac{1}{2}n(n+1) \begin{vmatrix} 1 & 2 & \dots & n-2 & -1 \\ 1 & 2 & \dots & -2 & -1 \\ \vdots & \vdots & \ddots & \vdots & \vdots \\ 1 & 2-n & \dots & -2 & -1 \\ 1-n & 2-n & \dots & -2 & -1 \end{vmatrix}$$

$y = ax^2 + bx + c \ (a \neq 0)$

$= a(x-h)^2 + k$  顶点式  $h = -\frac{b}{2a}$

$= a(x-x_1)(x-x_2)$  交点式

$\vec{AB} = -2\hat{i} - 5\hat{j} \quad \vec{AC} = \hat{i} - 2\hat{j} - \hat{k}$

$\vec{AB} \times \vec{AC} = \begin{vmatrix} \hat{i} & \hat{j} & \hat{k} \\ -2 & -5 & 0 \\ 1 & -2 & -1 \end{vmatrix} = 5\hat{i} - 7\hat{j} + 4\hat{k}$

$|\vec{AB} \times \vec{AC}| = \sqrt{(-10)^2 + (-7)^2 + (4)^2}$

MinerU2.5

13  
14)191  
14  
51  
42  
9

$$\begin{vmatrix} f(\alpha)f(\beta)f(\gamma) & 1 & \alpha & \alpha^2 & b_0 \\ g(\alpha)g(\beta)g(\gamma) & 1 & \beta & \beta^2 & c_0 \\ h(\alpha)h(\beta)h(\gamma) & 1 & \gamma & \gamma^2 & r \\ & 0 & r & q & p \end{vmatrix}$$

$$\begin{bmatrix} a_{11} & a_{12} & a_{13} \\ a_{21} & a_{22} & a_{23} \\ a_{31} & a_{32} & a_{33} \end{bmatrix} \xrightarrow{\text{第3列加上}} \begin{bmatrix} a_{11} & a_{12} & a_{13} + ka_{11} \\ a_{21} & a_{22} & a_{23} + ka_{21} \\ a_{31} & a_{32} & a_{33} + ka_{31} \end{bmatrix}$$

$$|A| = \frac{1}{2}n(n+1) \begin{vmatrix} 1 & 1 & 1 & \dots & 1 & 1 \\ 2 & 3 & 4 & \dots & n & 1 \\ 3 & 4 & 5 & \dots & 1 & 2 \\ \vdots & \vdots & \vdots & \ddots & \vdots & \vdots \\ n-1 & n & 1 & \dots & n-3 & n-2 \\ n & 1 & 2 & \dots & n-2 & n-1 \end{vmatrix}$$

$y = ax^2 + bx + c \ (a \neq 0) = a(x-h)^2 + k$  顶点式  $h = -\frac{b}{2a} = a(x-x_1)^2(x-x_2)$  交点式

Structure Error and Value Recognition Error

$\vec{AB} = -2\hat{i} - 5\hat{j} \quad \vec{AC} = \hat{i} - 2\hat{j} - \hat{k}$

$\vec{AB} \times \vec{AC} = \begin{vmatrix} \hat{i} & \hat{j} & \hat{k} \\ -2 & -5 & 0 \\ 1 & -2 & -1 \end{vmatrix} = 5\hat{i} - 7\hat{j} + 4\hat{k}$

$|\vec{AB} \times \vec{AC}| = \sqrt{(-10)^2 + (-7)^2 + (4)^2}$

Value Recognition Error

dots.ocr

13  
14)191  
14  
51  
42  
9

$$\begin{vmatrix} f(\alpha)f(\beta)f(\gamma) & 1 & \alpha & \alpha^2 & c_0 & a_1 & a_2 & a_3 & a_4 \\ g(\alpha)g(\beta)g(\gamma) & 1 & \beta & \beta^2 & c_0 & a_1 & a_2 & a_3 & a_4 \\ h(\alpha)h(\beta)h(\gamma) & 1 & \gamma & \gamma^2 & c_0 & a_1 & a_2 & a_3 & a_4 \\ & & & & r & q & p & 1 & 0 \\ & & & & 0 & r & q & p & 1 \end{vmatrix}$$

$$\begin{bmatrix} a_{11} & a_{12} & a_{13} \\ a_{21} & a_{22} & a_{23} \\ a_{31} & a_{32} & a_{33} \end{bmatrix} \xrightarrow{\text{第3列加上第1列的}k\text{倍}} \begin{bmatrix} a_{11} & a_{12} & a_{13} + ka_{11} \\ a_{21} & a_{22} & a_{23} + ka_{21} \\ a_{31} & a_{32} & a_{33} + ka_{31} \end{bmatrix}$$

$$|A| = \frac{1}{2}n(n+1) \begin{vmatrix} 1 & 2 & \dots & n-2 & -1 \\ 1 & 2 & \dots & -2 & -1 \\ \vdots & \vdots & \ddots & \vdots & \vdots \\ 1 & 2-n & \dots & -2 & -1 \\ 1-n & 2-n & \dots & -2 & -1 \end{vmatrix}$$

$= a(1x-x_1)(1x-x_2)$  交点式

Structure Error and Value Recognition Error

$|\vec{AB} \times \vec{AC}| = \sqrt{(-10)^2 + (-7)^2 + (4)^2}$

Structure Error

Figure S40. Compare with others in Formula Recognition.

## V.14. Chart Recognition

Original Chart

图表9：25Q1 各省及直辖市 GDP 总额及同比增长

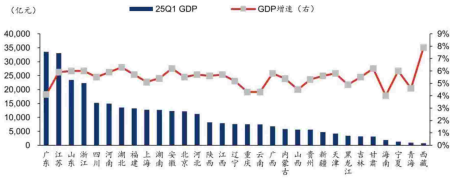

资料来源：Wind，华泰研究

PaddleOCR-VL

| 省份/直辖市 | 25Q1 GDP (亿元) | GDP增速 (%) |
|--------|---------------|-----------|
| 广东     | 33500         | 4.2       |
| 江苏     | 33000         | 5.8       |
| 山东     | 23500         | 6.0       |
| 浙江     | 22500         | 6.2       |
| 四川     | 15500         | 5.5       |
| 河南     | 15000         | 6.0       |
| 湖北     | 13500         | 6.5       |
| 福建     | 13000         | 5.5       |
| 上海     | 12500         | 5.0       |
| 湖南     | 12500         | 5.8       |
| 安徽     | 12000         | 6.2       |
| 北京     | 11500         | 5.5       |
| 河北     | 11000         | 5.8       |
| 陕西     | 8000          | 5.5       |
| 江西     | 7500          | 5.8       |
| 辽宁     | 7000          | 5.0       |
| 重庆     | 7000          | 4.5       |
| 云南     | 6500          | 4.2       |
| 广西     | 6000          | 5.8       |
| 内蒙古    | 5500          | 5.5       |
| 山西     | 5000          | 4.5       |
| 贵州     | 4500          | 5.5       |
| 新疆     | 4000          | 5.8       |
| 天津     | 3500          | 5.0       |
| 黑龙江    | 3000          | 5.5       |
| 吉林     | 2500          | 6.0       |
| 甘肃     | 2000          | 6.5       |
| 海南     | 1500          | 4.0       |
| 宁夏     | 1000          | 6.0       |
| 青海     | 800           | 4.5       |
| 西藏     | 500           | 6.0       |

Qwen2.5VL-72B

| 省份  | 25Q1 GDP (亿元) | GDP增速 (%) |
|-----|---------------|-----------|
| 广东  | 30000         | 4.0       |
| 江苏  | 30000         | 4.0       |
| 山东  | 25000         | 4.0       |
| 浙江  | 20000         | 4.0       |
| 四川  | 15000         | 4.0       |
| 河南  | 15000         | 4.0       |
| 湖北  | 12000         | 4.0       |
| 湖南  | 12000         | 4.0       |
| 福建  | 12000         | 4.0       |
| 上海  | 10000         | 4.0       |
| 河北  | 10000         | 4.0       |
| 安徽  | 10000         | 4.0       |
| 北京  | 10000         | 4.0       |
| 陕西  | 8000          | 4.0       |
| 辽宁  | 8000          | 4.0       |
| 重庆  | 8000          | 4.0       |
| 云南  | 7000          | 4.0       |
| 广西  | 7000          | 4.0       |
| 内蒙古 | 7000          | 4.0       |
| 山西  | 6000          | 4.0       |
| 贵州  | 6000          | 4.0       |
| 新疆  | 6000          | 4.0       |
| 天津  | 5000          | 4.0       |
| 黑龙江 | 5000          | 4.0       |
| 吉林  | 5000          | 4.0       |
| 甘肃  | 5000          | 4.0       |
| 青海  | 5000          | 4.0       |
| 宁夏  | 5000          | 4.0       |
| 海南  | 5000          | 4.0       |
| 西藏  | 5000          | 4.0       |

Value Recognition Error

GPT4o

| 地区  | 25Q1 GDP (亿元) | GDP增速 (%) |
|-----|---------------|-----------|
| 广东  | 35,000        | 6.5       |
| 江苏  | 30,000        | 6.5       |
| 山东  | 25,000        | 5         |
| 浙江  | 20,000        | 5.5       |
| 河南  | 20,000        | 5         |
| 四川  | 15,000        | 4.5       |
| 湖北  | 15,000        | 5         |
| 福建  | 15,000        | 4.5       |
| 上海  | 15,000        | 4.5       |
| 湖南  | 10,000        | 4.5       |
| 安徽  | 10,000        | 5         |
| 北京  | 10,000        | 4         |
| 河北  | 10,000        | 3.5       |
| 江西  | 10,000        | 4         |
| 辽宁  | 10,000        | 3         |
| 陕西  | 8,000         | 4.5       |
| 重庆  | 8,000         | 4.5       |
| 云南  | 8,000         | 5         |
| 广西  | 8,000         | 4         |
| 内蒙古 | 8,000         | 4         |
| 山西  | 7,000         | 4.5       |
| 贵州  | 7,000         | 5         |
| 新疆  | 6,000         | 4         |
| 天津  | 6,000         | 3.5       |
| 黑龙江 | 6,000         | 3         |
| 吉林  | 5,000         | 3.5       |
| 甘肃  | 5,000         | 3         |
| 海南  | 5,000         | 4.5       |
| 宁夏  | 4,000         | 4         |
| 青海  | 4,000         | 4.5       |
| 西藏  | 3,000         | 6         |

Value Recognition Error

Figure S41. Compare with others in Chart Recognition.

### Original Chart

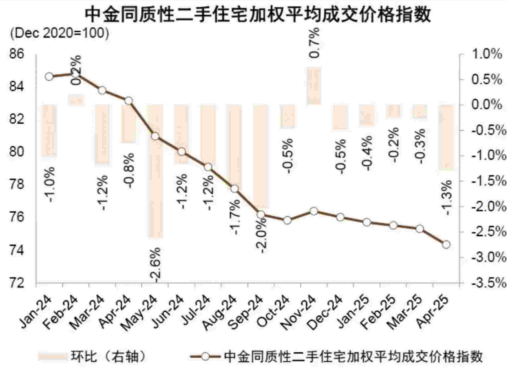

### PaddleOCR-VL

| 日期     | 中金同质性二手住宅加权平均成交价格指数 (Dec 2020=100) | 环比 (右轴) |
|--------|------------------------------------|---------|
| Jan-24 | 84.5                               | -1.0%   |
| Feb-24 | 84.8                               | 0.2%    |
| Mar-24 | 83.8                               | -1.2%   |
| Apr-24 | 83.0                               | -0.8%   |
| May-24 | 81.0                               | -2.6%   |
| Jun-24 | 80.0                               | -1.2%   |
| Jul-24 | 79.0                               | -1.2%   |
| Aug-24 | 78.0                               | -1.7%   |
| Sep-24 | 76.0                               | -2.0%   |
| Oct-24 | 75.8                               | -0.5%   |
| Nov-24 | 76.2                               | 0.7%    |
| Dec-24 | 75.8                               | -0.5%   |
| Jan-25 | 75.5                               | -0.4%   |
| Feb-25 | 75.2                               | -0.2%   |
| Mar-25 | 75.0                               | -0.3%   |
| Apr-25 | 74.0                               | -1.3%   |

### Qwen3VL-30B-A3B

| 日期     | 中金同质性二手住宅加权平均成交价格指数 | 环比 (右轴)    |
|--------|---------------------|------------|
| Jan-24 | 85.0                | -1.0%      |
| Feb-24 | 84.8                | -1.2%      |
| Mar-24 | 84.2                | -0.8%      |
| Apr-24 | 83.6                | -2.6%      |
| May-24 | 81.4                | -1.2%      |
| Jun-24 | 80.8                | -1.2%      |
| Jul-24 | 80.2                | -1.7%      |
| Aug-24 | 79.4                | -2.0%      |
| Sep-24 | 77.8                | -0.5%      |
| Oct-24 | 78.2                | 0.7%       |
| Nov-24 | 78.0                | -0.5%      |
| Dec-24 | 77.8                | -0.4%      |
| Jan-25 | 77.6                | -0.2%      |
| Feb-25 | 77.4                | -0.3%      |
| Mar-25 | 77.2                | -1.3%      |
| Apr-25 | 74.0                | Value Lost |

### GPT4o

| 时间     | 环比变化            |
|--------|-----------------|
| Jan-24 | -1.0%           |
| Feb-24 | 0.2%            |
| Mar-24 | -1.2%           |
| Apr-24 | -0.8%           |
| May-24 | -2.6%           |
| Jun-24 | -1.2%           |
| Jul-24 | -1.7%           |
| Aug-24 | -2.0%           |
| Sep-24 | Structure Error |
| Oct-24 | 0.7%            |
| Nov-24 | -0.5%           |
| Dec-24 | -0.5%           |
| Jan-25 | -0.4%           |
| Jan-25 | -0.2%           |
| Feb-25 | -0.3%           |
| Mar-25 | -1.3%           |
| Apr-25 | -               |

Figure S42. Compare with others in Chart Recognition.

## References

- [1] Shuai Bai, Yuxuan Cai, Ruizhe Chen, Keqin Chen, Xionghui Chen, Zesen Cheng, Lianghao Deng, Wei Ding, Chang Gao, Chunjiang Ge, et al. Qwen3-vl technical report. *arXiv preprint arXiv:2511.21631*, 2025. 4
- [2] Shuai Bai, Keqin Chen, Xuejing Liu, Jialin Wang, Wenbin Ge, Sibao Song, Kai Dang, Peng Wang, Shijie Wang, Jun Tang, et al. Qwen2.5-vl technical report. *arXiv preprint arXiv:2502.13923*, 2025. 6
- [3] Baidu-ERNIE-Team. Ernie 4.5 technical report, 2025. 1, 2, 4
- [4] Leilani Battle, Peitong Duan, Zachery Miranda, Dana Mukusheva, Remco Chang, and Michael Stonebraker. Beagle: Automated extraction and interpretation of visualizations from the web. In *Proceedings of the 2018 CHI conference on human factors in computing systems*, pages 1–8, 2018. 3
- [5] Qian Chen, Xianyin Zhang, Lifan Guo, Feng Chen, and Chi Zhang. Dianjin-ocr-r1: Enhancing ocr capabilities via a reasoning-and-tool interleaved vision-language model. *arXiv preprint arXiv:2508.13238*, 2025. 1
- [6] Cheng Cui, Ting Sun, Manhui Lin, Tingquan Gao, Yubo Zhang, Jiakuan Liu, Xueqing Wang, Zelun Zhang, Changda Zhou, Hongen Liu, et al. Paddleocr 3.0 technical report. *arXiv preprint arXiv:2507.05595*, 2025. 1, 2, 3
- [7] Kenny Davila, Bhargava Urala Kota, Srirangaraj Setlur, Venu Govindaraju, Christopher Tensmeyer, Sumit Shekhar, and Ritwick Chaudhry. Icdar 2019 competition on harvesting raw tables from infographics (chart-infographics). In *2019 International Conference on Document Analysis and Recognition (ICDAR)*, pages 1594–1599. IEEE, 2019. 3
- [8] Tao Ge, Xin Chan, Xiaoyang Wang, Dian Yu, Haitao Mi, and Dong Yu. Scaling synthetic data creation with 1,000,000,000 personas. *arXiv preprint arXiv:2406.20094*, 2024. 4
- [9] Philippe Gervais, Anastasiia Fadeeva, and Andrii Maksai. Mathwriting: A dataset for handwritten mathematical expression recognition. In *Proceedings of the 31st ACM SIGKDD Conference on Knowledge Discovery and Data Mining V. 2*, pages 5459–5469, 2025. 3
- [10] Kushal Kaffle, Brian Price, Scott Cohen, and Christopher Kanan. Dvqa: Understanding data visualizations via question answering. In *Proceedings of the IEEE conference on computer vision and pattern recognition*, pages 5648–5656, 2018. 3
- [11] Shankar Kantharaj, Rixie Tiffany Ko Leong, Xiang Lin, Ahmed Masry, Megh Thakkar, Enamul Hoque, and Shafiq Joty. Chart-to-text: A large-scale benchmark for chart summarization. *arXiv preprint arXiv:2203.06486*, 2022. 3
- [12] Zhang Li, Yuliang Liu, Qiang Liu, Zhiyin Ma, Ziyang Zhang, Shuo Zhang, Zidun Guo, Jiarui Zhang, Xinyu Wang, and Xiang Bai. Monkeyocr: Document parsing with a structure-recognition-relation triplet paradigm. *arXiv preprint arXiv:2506.05218*, 2025. 5, 6
- [13] Lukas Blecher. pix2tex - latex ocr. <https://github.com/lukas-blecher/LaTeX-OCR>, 2022. Accessed: 2025-06-23. 3
- [14] Junyu Luo, Zekun Li, Jinpeng Wang, and Chin-Yew Lin. Chartocr: Data extraction from charts images via a deep hybrid framework. In *Proceedings of the IEEE/CVF winter conference on applications of computer vision*, pages 1917–1925, 2021. 3
- [15] Maksym Lysak, Ahmed Nassar, Nikolaos Livathinos, Christoph Auer, and Peter Staar. Optimized table tokenization for table structure recognition. In *International Conference on Document Analysis and Recognition*, pages 37–50. Springer, 2023. 1
- [16] Mahshad Mahdavi, Richard Zanibbi, Harold Mouchere, Christian Viard-Gaudin, and Utpal Garain. Icdar 2019 crohme+ tfd: Competition on recognition of handwritten mathematical expressions and typeset formula detection. In *2019 International Conference on Document Analysis and Recognition (ICDAR)*, pages 1533–1538. IEEE, 2019. 3
- [17] Ahmed Masry, Do Xuan Long, Jia Qing Tan, Shafiq Joty, and Enamul Hoque. Chartqa: A benchmark for question answering about charts with visual and logical reasoning. *arXiv preprint arXiv:2203.10244*, 2022. 3
- [18] Ahmed Masry, Parsa Kavehzadeh, Xuan Long Do, Enamul Hoque, and Shafiq Joty. Unichart: A universal vision-language pretrained model for chart comprehension and reasoning. *arXiv preprint arXiv:2305.14761*, 2023. 3
- [19] Nitesh Methani, Pritha Ganguly, Mitesh M Khapra, and Pratyush Kumar. Plotqa: Reasoning over scientific plots. In *Proceedings of the IEEE/CVF winter conference on applications of computer vision*, pages 1527–1536, 2020. 3
- [20] Harold Mouchere, Christian Viard-Gaudin, Richard Zanibbi, and Utpal Garain. Icfhr 2014 competition on recognition of on-line handwritten mathematical expressions (crohme 2014). In *2014 14th international conference on frontiers in handwriting recognition*, pages 791–796. IEEE, 2014. 3
- [21] Harold Mouchère, Christian Viard-Gaudin, Richard Zanibbi, and Utpal Garain. Icfhr2016 crohme: Competition on recognition of online handwritten mathematical expressions. In *2016 15th International Conference on Frontiers in Handwriting Recognition (ICFHR)*, pages 607–612. IEEE, 2016. 3
- [22] Junbo Niu, Zheng Liu, Zhuangcheng Gu, Bin Wang, Linke Ouyang, Zhiyuan Zhao, Tao Chu, Tianyao He, Fan Wu, Qintong Zhang, et al. Mineru2.5: A decoupled vision-language model for efficient high-resolution document parsing. *arXiv preprint arXiv:2509.22186*, 2025. 5, 6
- [23] rednote-hilab. dots.ocr: Multilingual document layout parsing in a single vision-language model, 2025. 5
- [24] Ting Sun, Cheng Cui, Yuning Du, and Yi Liu. Pp-doclout: A unified document layout detection model to accelerate large-scale data construction. *arXiv preprint arXiv:2503.17213*, 2025. 4
- [25] Benny J Tang, Angie Boggust, and Arvind Satyanarayan. Vistext: A benchmark for semantically rich chart captioning. *arXiv preprint arXiv:2307.05356*, 2023. 3

- [26] Bin Wang, Zhuangcheng Gu, Guang Liang, Chao Xu, Bo Zhang, Botian Shi, and Conghui He. Unimernet: A universal network for real-world mathematical expression recognition. *arXiv preprint arXiv:2404.15254*, 2024. [3](#)
- [27] Ye Yuan, Xiao Liu, Wondimu Dikubab, Hui Liu, Zhilong Ji, Zhongqin Wu, and Xiang Bai. Syntax-aware network for handwritten mathematical expression recognition. In *Proceedings of the IEEE/CVF conference on computer vision and pattern recognition*, pages 4553–4562, 2022. [3](#)
- [28] Jiaxin Zhang, Wentao Yang, Songxuan Lai, Zecheng Xie, and Lianwen Jin. Dockylin: A large multimodal model for visual document understanding with efficient visual slimming. In *Proceedings of the AAAI Conference on Artificial Intelligence*, pages 9923–9932, 2025. [4](#)
